# Supplementary material
Source: PubMed Central journal article supplement (PMC3566646)

**Supporting Information**  
for  
**General Methodology for the  
Preparation of 2,5-Disubstituted-1,3-  
Oxazoles**

David R. Williams\*, and Liangfeng Fu

*Department of Chemistry, Indiana University,  
800 E. Kirkwood Ave., Bloomington, IN 47405-7102*

[williamd@indiana.edu](mailto:williamd@indiana.edu)

|                                                                  | Page |
|------------------------------------------------------------------|------|
| 1) General Information                                           | S-2  |
| 2) Experimental Procedures                                       | S-4  |
| 3) $^1\text{H}$ and $^{13}\text{C}$ NMR of synthesized Compounds | S-17 |

## General Information

Proton nuclear magnetic resonance ( $^1\text{H}$  NMR) spectra were measured on a Vairan INOVA-400 (400 MHz) or Gem-300 (300 MHz). Carbon nuclear magnetic resonance ( $^{13}\text{C}$  NMR) spectra were measured on a Vairan INOVA-500 (500 MHz), Varian INOVA-400 (400 MHz), or Varian VXR-400 (400 MHz).  $^1\text{H}$  NMR and  $^{13}\text{C}$  NMR spectra were acquired as solutions in  $\text{CDCl}_3$  and are reported in parts per million (ppm) downfield ( $\delta$ ) from tetramethylsilane using residual chloroform ( $\text{CHCl}_3$ ) as an internal standard set to  $\delta$  7.27 and  $\delta$  77.00, respectively. Proton NMR data are reported in the form:  $\delta$  (multiplicity, coupling constants, number of protons). Mass spectral data (MS and HRMS) were recorded on a Kratos MS-80 RFA mass spectrometer by use of chemical ionization (CI) with methane or electron impact (EI).

Analytical thin-layer chromatography (TLC) was performed using glass-backed 0.25 mm thickness silica gel 60 ( $\text{F}_{254}$ ) plates (EM Science) which were visualized under UV light and/or staining with ethanolic *p*-anisaldehyde. Flash chromatography was performed using Merck silica gel 60 (Kieselgel 60) (E. M. Science; 230-400 mesh ASTM) or similar products from Whatman Scientific or Sorbent Technologies and pressure was obtained using an airline bleed.

All reagents were used immediately before dried under vacuum, using molecular sieves, or distilled unless noted otherwise. Oxazole was used as received from Sigma Aldrich. All solvents were reagent grade and used as received unless noted otherwise. Bulk grade hexanes and ethyl acetate (EtOAc) for chromatography were distilled before use. Diethyl ether ( $\text{Et}_2\text{O}$ ) and tetrahydrofuran (THF) were

distilled under nitrogen from sodium/benzophenone ketyl immediately before use.

Diisopropylamine was distilled from  $\text{CaH}_2$  under dry air immediately before use.

Unless otherwise noted, all reactions were conducted in flame or oven-dried glassware under an atmosphere of nitrogen. All non-volatile samples were pumped to a constant weight under high vacuum (0.1-0.2 mmHg) at ambient temperature following removal of solvent by rotary evaporation.

## Experimental Procedures

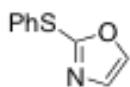

**2-(Phenylthio)oxazole.** To a stirred solution of oxazole (0.80 g, 11.58 mmol, 1.0 equiv) in THF (120 mL) was added slowly dropwise *n*-BuLi (5.65 mL, 13.90 mmol, 1.2 equiv) at -78 °C and it was stirred at -78 °C for 1 h. A solution of phenyl disulfide (3.54 g, 16.21 mmol, 1.4 equiv) in anhydrous THF (50 mL) was added slowly dropwise via syringe. The resulting mixture was allowed to stir at -78 °C for 1 h, warm to room temperature slowly, and stir at room temperature for 48 h. After the completion of the reaction, it was quenched with saturated aqueous NH<sub>4</sub>Cl (30 mL) and extracted with Et<sub>2</sub>O (3 x 20 mL). The separated organic extracts were washed with saturated aqueous NaHCO<sub>3</sub> (30 mL), brine (30 mL) and dried over Na<sub>2</sub>SO<sub>4</sub>. Removal of solvent and flash column chromatography over silica gel using hexanes:EtOAc (10:1 & 4:1) to give 2-(phenylthio)oxazole (1.87 g, 10.56 mmol, 91%) as yellowish oil; <sup>1</sup>H NMR (400 MHz, CDCl<sub>3</sub>) δ 7.68 (s, 1H), 7.56-7.61 (m, 2H), 7.38-7.43 (m, 3H), 7.14 (s, 1H); <sup>13</sup>C NMR (400 MHz, CDCl<sub>3</sub>): δ 159.0, 141.1, 133.4, 129.7, 129.3, 129.2, 129.1.

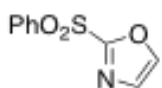

**2-(Phenylsulfonyl)oxazole (1).** Ammonium Molybdate (2.60 g, 2.02 mmol, 2.2 equiv) in a reaction flask was added 30% hydrogen peroxide (10.30 mL) at 0 °C, and it was further stirred at 0 °C for 15 min. The resulting bright yellow solution was added dropwise to a solution of 2-(phenylthio)oxazole (0.16 g, 0.92 mmol, 1.0 equiv) in ethanol (15 mL) at 0 °C. The reaction was allowed to warm to room temperature overnight. It was then

partitioned between H<sub>2</sub>O and Et<sub>2</sub>O. The aqueous phase was extracted with Et<sub>2</sub>O (3 x 30 mL), the combined organic extracts were washed with brine (20 mL), and dried over Na<sub>2</sub>SO<sub>4</sub>. Removal of solvent and flash column chromatography over silica gel using hexanes:EtOAc (3:1) to give 2-(phenylsulfonyl)oxazole (**1**) (0.19 g, 0.91 mmol, 99%) as a white solid; <sup>1</sup>H NMR (400 MHz, CDCl<sub>3</sub>): δ 7.73-7.86 (m, 2H), 7.51 (s, 1H), 7.37-7.46 (m, 1H), 7.27-7.36 (m, 2H), 6.99 (s, 1H); <sup>13</sup>C NMR (400 MHz, CDCl<sub>3</sub>): δ 158.8, 142.6, 137.9, 135.3, 129.9, 129.5, 129.0; HRMS-Cl (calcd. for C<sub>9</sub>H<sub>8</sub>O<sub>3</sub>NS [M+H]<sup>+</sup>) 210.0219, found 210.0212.

**Representative procedure for alkylation of 2-(phenylsulfonyl)oxazole:**

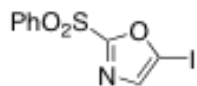

**5-Iodo-2-(phenylsulfonyl)oxazole (6).** To a stirred solution of (*i*-Pr)<sub>2</sub>NH (0.40 mL, 2.8 mmol, 1.4 equiv) in THF (50 mL) was slowly added *n*-BuLi (2.46 M in hexanes, 0.90 mL, 2.2 mmol, 1.1 equiv) dropwise at 0 °C, and it was further stirred at 0 °C for 0.5 h. It was then cooled to -78 °C and a solution of 2-(phenylsulfonyl)oxazole (**1**) (0.42 g, 2.0 mmol, 1.0 equiv) in THF (10 mL) was added dropwise. The resulting mixture was stirred at -78 °C for 1 h and a solution of *N*-iodosuccinic imide (0.50 g, 2.2 mmol, 1.1 equiv) in THF (10 mL) was added slowly. Kept at -78 °C for 0.5 h, it was then allowed to warm to room temperature slowly, and quenched with saturated NH<sub>4</sub>Cl (20 mL). The aqueous layer was extracted with Et<sub>2</sub>O (3 x 20 mL), the combined organic extracts were washed with brine (30 mL), and dried over Na<sub>2</sub>SO<sub>4</sub>. Removal of solvent and flash column chromatography over silica gel using hexanes:EtOAc (4:1) to give **6** (0.58 g,

1.7 mmol, 87%) as a yellowish solid;  $^1\text{H}$  NMR (400 MHz,  $\text{CDCl}_3$ ):  $\delta$  8.24-8.28 (m, 2H), 7.86-7.94 (m, 1H), 7.74-7.83 (m, 2H), 7.49 (s, 1H);  $^{13}\text{C}$  NMR (400 MHz,  $\text{CDCl}_3$ ):  $\delta$  163.2, 138.0, 137.8, 135.7, 130.2, 129.4, 93.8; HRMS-Cl (calcd. for  $\text{C}_9\text{H}_7\text{O}_3\text{NIS}$   $[\text{M}+\text{H}]^+$ ) 335.9186, found 335.9193.

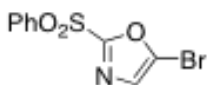

**5-Bromo-2-(phenylsulfonyl)oxazole (7).** General procedure

using 2-(phenylsulfonyl)oxazole (**1**) (1.0 equiv), *n*-BuLi (1.1 equiv), (*i*-Pr) $_2$ NH (1.4 equiv), *N*-bromosuccinic imide (1.1 equiv); yield (81%);  $^1\text{H}$  NMR (400 MHz,  $\text{CDCl}_3$ ):  $\delta$  8.11 (m, 2H), 7.70-7.79 (m, 1H), 7.56-7.68 (m, 2H), 7.19 (s, 1H);  $^{13}\text{C}$  NMR (400 MHz,  $\text{CDCl}_3$ ):  $\delta$  160.1, 140.9, 137.8, 135.7, 130.2, 130.0, 129.4, 127.1; HRMS-Cl (calcd. for  $\text{C}_9\text{H}_7\text{O}_3\text{NBrS}$   $[\text{M}+\text{H}]^+$ ) 287.9325, found 287.9324.

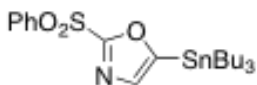

**2-(Phenylsulfonyl)-5-(tributylstannyl)oxazole (8).**

General procedure using 2-(phenylsulfonyl)oxazole (**1**) (1.0 equiv), *n*-BuLi (1.1 equiv), (*i*-Pr) $_2$ NH (1.4 equiv), tributyltin chloride (1.1 equiv); yield (86%);  $^1\text{H}$  NMR (400 MHz,  $\text{CDCl}_3$ ):  $\delta$  8.10 (d,  $J = 7.3$  Hz, 2H), 7.66-7.69 (m, 1H), 7.56-7.61 (m, 2H), 7.25 (s, 1H), 1.47-1.55 (m, 6H), 1.24-1.34 (m, 6H), 1.12-1.16 (t,  $J = 8.0$  Hz, 6H), 0.87 (t,  $J = 7.2$  Hz, 3H);  $^{13}\text{C}$  NMR (400 MHz,  $\text{CDCl}_3$ ):  $\delta$  162.9, 162.8, 139.1, 138.7, 134.7, 129.6, 128.9, 28.9, 27.2, 13.8, 10.8; HRMS-Cl (calcd. for  $\text{C}_{21}\text{H}_{34}\text{O}_3\text{NSSn}$   $[\text{M}+\text{H}]^+$ ) 500.1276, found 500.1254.

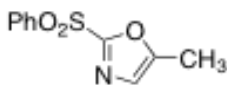

**5-Methyl-2-(phenylsulfonyl)oxazole (9).** General procedure using 2-(phenylsulfonyl)oxazole (**1**) (1.0 equiv), *n*-BuLi (1.1 equiv), (*i*-Pr)<sub>2</sub>NH (1.4 equiv), iodomethane (1.1 equiv); yield (91%); <sup>1</sup>H NMR (400 MHz, CDCl<sub>3</sub>): δ 8.10 (m, 2H), 7.67-7.73 (m, 1H), 7.56-7.62 (m, 2H), 6.93 (s, 1H), 2.38 (s, 3H); <sup>13</sup>C NMR (400 MHz, CDCl<sub>3</sub>): δ 157.3, 153.8, 138.3, 135.0, 129.7, 128.9, 125.7, 11.4; HRMS-Cl (calcd. for C<sub>10</sub>H<sub>10</sub>O<sub>3</sub>NS [M+H]<sup>+</sup>) 224.0376, found 224.0375.

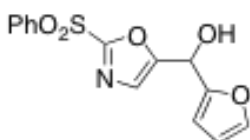

**Furan-2-yl(2-(phenylsulfonyl)oxazol-5-yl)methanol (10).**

General procedure using 2-(phenylsulfonyl)oxazole (**1**) (1.0 equiv), *n*-BuLi (1.1 equiv), (*i*-Pr)<sub>2</sub>NH (1.4 equiv), furo-2-aldehyde (1.1 equiv); yield (72%); <sup>1</sup>H NMR (400 MHz, CDCl<sub>3</sub>): δ 8.10 (d, *J* = 8.1 Hz, 2H), 7.70-7.75 (m, 1H), 7.58-7.64 (m, 2H), 7.44 (s, 1H), 7.18 (s, 1H), 6.36-6.40 (m, 2H), 5.92 (s, 1H), 2.77 (br s, 1H); <sup>13</sup>C NMR (400 MHz, CDCl<sub>3</sub>): δ 158.5, 154.6, 150.8, 143.6, 137.9, 135.2, 129.8, 129.1, 126.9, 110.9, 109.2, 62.5; HRMS-Cl (calcd. for C<sub>14</sub>H<sub>12</sub>O<sub>5</sub>NS [M+H]<sup>+</sup>) 306.0431, found 306.0439.

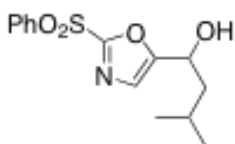

**3-Methyl-1-(2-(phenylsulfonyl)oxazol-5-yl)butan-1-ol**

**(11).** General procedure using 2-(phenylsulfonyl)oxazole (**1**)

(1.0 equiv), *n*-BuLi (1.1 equiv), (*i*-Pr)<sub>2</sub>NH (1.4 equiv), isovaleraldehyde (1.1 equiv); yield (75%); <sup>1</sup>H NMR (400 MHz, CDCl<sub>3</sub>): δ 8.07-8.11 (m, 2H), 7.69-7.74 (m, 1H), 7.58-7.63 (m, 2H), 7.12 (d, *J* = 0.8 Hz, 1H), 4.82-4.90 (m, 1H), 2.39 (d, *J* = 5.5 Hz, 1H), 1.70-1.84 (m, 2H), 1.58-1.67 (m, 1H), 0.94 (t, *J* = 6.5 Hz, 6H); <sup>13</sup>C NMR (400 MHz, CDCl<sub>3</sub>): δ

158.5, 157.7, 137.8, 134.9, 129.6, 128.8, 124.9, 64.3, 44.0, 24.3, 23.0, 21.7; HRMS-Cl (calcd. for  $C_{14}H_{18}O_4NS$   $[M+H]^+$ ) 296.0951, found 296.0943.

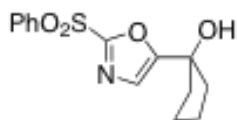

**1-(2-(Phenylsulfonyl)oxazol-5-yl)cyclopentanol (12).**

General procedure using 2-(phenylsulfonyl)oxazole (**1**) (1.0 equiv), *n*-BuLi (1.1 equiv), (*i*-Pr)<sub>2</sub>NH (1.4 equiv), cyclopentanone (1.1 equiv); yield (87%); <sup>1</sup>H NMR (400 MHz, CDCl<sub>3</sub>): δ 8.08 (d, *J* = 7.7 Hz, 2H), 7.67-7.74 (m, 1H), 7.56-7.63 (m, 2H), 7.11 (s, 1H), 2.28 (br s, 1H), 1.70-2.02 (m, 8H); <sup>13</sup>C NMR (400 MHz, CDCl<sub>3</sub>): δ 160.7, 157.7, 138.1, 135.1, 129.8, 128.9, 124.2, 78.5, 77.6, 77.2, 76.9, 40.2, 23.7; HRMS-Cl (calcd. for  $C_{14}H_{16}O_4NS$   $[M+H]^+$ ) 294.0795, found 294.0785.

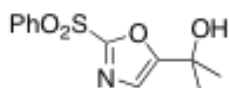

**2-(2-(Phenylsulfonyl)oxazol-5-yl)propan-2-ol (13).** General procedure using 2-(phenylsulfonyl)oxazole (**1**) (1.0 equiv), *n*-

BuLi (1.1 equiv), (*i*-Pr)<sub>2</sub>NH (1.4 equiv), acetone (1.1 equiv); yield (81%); <sup>1</sup>H NMR (400 MHz, CDCl<sub>3</sub>): δ 8.07 (d, *J* = 7.6 Hz, 2H), 7.65-7.73 (m, 1H), 7.53-7.64 (m, 2H), 7.08 (s, 1H), 2.59 (br s, 1H), 1.59 (s, 6H); <sup>13</sup>C NMR (400 MHz, CDCl<sub>3</sub>): δ 161.9, 157.9, 138.3, 135.4, 130.0, 129.2, 123.9, 68.5, 29.0; HRMS-Cl (calcd. for  $C_{12}H_{14}O_4NS$   $[M+H]^+$ ) 268.0638, found 268.0634.

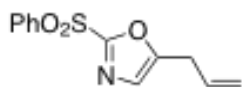

**5-Allyl-2-(phenylsulfonyl)oxazole (14).** To a stirred

solution of (*i*-Pr)<sub>2</sub>NH (0.06 mL, 0.38 mmol, 1.5 equiv) in THF (10 mL) was slowly added *n*-BuLi (2.46 M in hexanes, 0.12 mL, 0.30 mmol, 1.2 equiv) dropwise at 0 °C and it was stirred at 0 °C for further 0.5 h. It was then cooled



to -78 °C and a solution of 2-(phenylsulfonyl)oxazole (**1**) (53.0 mg, 0.25 mmol, 1.0 equiv) in THF (5 mL) was slowly added dropwise. It was stirred at -78 °C for 1 h and a solution of ZnBr<sub>2</sub> (45.0 mg, 0.20 mmol, 0.8 equiv) in THF (5 mL) was slowly added. After staying at -78 °C for 0.5 h, it was allowed to warm to room temperature and stirred at room temperature for 1 h. A solution of Pd(PPh<sub>3</sub>)<sub>4</sub> (28.9 mg, 0.025 mmol, 10% equiv) and allyl bromide (60.5 mg, 0.50 mmol, 2.0 equiv) in THF (5 mL) was slowly added and it was heated to 60 °C. After the completion of the reaction, it was cooled to room temperature and quenched with saturated aqueous NH<sub>4</sub>Cl (20 mL). The separated aqueous layer was extracted with Et<sub>2</sub>O (2 x 20 mL), the combined organic extracts were washed with saturated aqueous NaHCO<sub>3</sub> (20 mL), brine (20 mL), and dried over Na<sub>2</sub>SO<sub>4</sub>. Removal of solvent and flash column chromatography over silica gel using hexanes:EtOAc (5:1) to give **14** (56.0 mg, 0.23 mmol, 90%) as yellow oil; <sup>1</sup>H NMR (400 MHz, CDCl<sub>3</sub>): δ 8.10 (m, 2H), 7.57-7.75 (m, 3H), 6.96 (s, 1H), 5.80-5.90 (m, 1H), 5.20 (m, 2H), 3.47 (dd, *J*<sub>1</sub> = 6.6 Hz, *J*<sub>2</sub> = 1.1 Hz, 2H); <sup>13</sup>C NMR (400 MHz, CDCl<sub>3</sub>): δ 157.7, 155.5, 138.3, 135.0, 130.7, 129.7, 129.0, 125.6, 119.5, 30.3; HRMS-CI (calcd. for C<sub>12</sub>H<sub>12</sub>O<sub>3</sub>NS [M+H]<sup>+</sup>) 250.0532, found 250.0535.

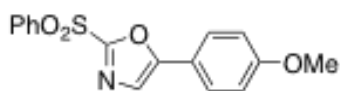

**5-(4-Methoxyphenyl)-2-(phenylsulfonyl)oxazole**

**(15).** To a stirred solution of 5-iodo-2-phenylsulfonyloxazole (**6**) (52.1 mg, 0.16 mmol, 1.0 equiv), palladium tetrakis(triphenylphosphine) (18.5 mg, 0.016 mmol, 0.1 equiv), phenyl boronic acid (39.0 mg, 0.32 mmol, 2.0 equiv) in THF (2 mL) and toluene (2 mL) was added aqueous Na<sub>2</sub>CO<sub>3</sub> (1 mL, 2.0 M), and the resulting mixture was degassed by blowing

in with nitrogen for 5 min. The reaction mixture was then sealed and heated to 70 °C for 18 h. It was cooled to rt, diluted with ether (50 mL), washed with saturated aqueous NaHCO<sub>3</sub> (10 mL), brine (10 mL), and dried over Na<sub>2</sub>SO<sub>4</sub>. Removal of solvent and flash column chromatography over silica gel with hexanes:EtOAc (4:1) to give 5-phenyl-2-phenylsulfonyloxazole (**15**) (41.7 mg, 0.14 mmol, 94%); <sup>1</sup>H NMR (400 MHz, CDCl<sub>3</sub>): δ 8.12-8.16 (m, 2H), 7.65-7.75 (m, 1H), 7.58-7.65 (m, 4H), 7.35 (s, 1H), 6.76 (d, *J* = 8.8 Hz, 2H), 3.86 (s, 3H); <sup>13</sup>C NMR (400 MHz, CDCl<sub>3</sub>): δ 171.1, 161.5, 157.1, 155.6, 138.7, 135.2, 130.0, 129.2, 127.2, 122.6, 119.2, 115.0, 55.9; HRMS-Cl (calcd. for C<sub>16</sub>H<sub>14</sub>O<sub>4</sub>NS [M+H]<sup>+</sup>) 316.0638, found 316.0639.

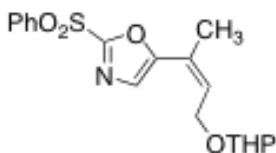

**(Z)-2-(Phenylsulfonyl)-5-(4-(tetrahydro-2H-pyran-2-yl)oxy)but-2-en-2-yl)oxazole (17).** To a stirred solution of 5-tributylstannyl-2-phenylsulfonyloxazole (**8**) (40.0 mg, 0.08 mmol, 1.0 equiv) in anhydrous DMSO (4.0 mL) was added anhydrous LiCl (21.0 mg, 0.48 mmol, 6.0 equiv), CuCl (40.0 mg, 0.40 mmol, 5.0 equiv), Pd(PPh<sub>3</sub>)<sub>4</sub> (9.3 mg, 10% equiv), and iodide **16** (28.2 mg, 0.10 mmol, 1.2 equiv). It was degassed by blowing in with nitrogen for 5 min, the reaction mixture was then sealed and heated to 60 °C for 4 h. After the completion of the reaction, it was cooled to room temperature, diluted with Et<sub>2</sub>O (50 mL), and washed with a mixture of brine (20 mL) and saturated aqueous NH<sub>4</sub>Cl (10 mL). The aqueous layer was further extracted with Et<sub>2</sub>O (2 x 20 mL), and the combined organic extracts were washed with brine (2 x 20 mL), dried over Na<sub>2</sub>SO<sub>4</sub>. Removal of solvent and flash column chromatography over silica gel with hexanes:EtOAc (4:1) to give **17** (26.1 mg, 0.072 mmol, 90%) as yellowish oil;

$^1\text{H}$  NMR (400 MHz,  $\text{CDCl}_3$ ):  $\delta$  8.08-8.15 (m, 2H), 7.57-7.75 (m, 3H), 7.16 (s, 1H), 5.90 (m, 1H), 4.65 (m, 1H), 4.26 (m, 2H), 3.87 (m, 1H), 3.52 (m, 1H), 2.06 (d,  $J = 1.5$  Hz, 3H), 1.70-1.90 (m, 2H), 1.50-1.68 (m, 4H);  $^{13}\text{C}$  NMR (400 MHz,  $\text{CDCl}_3$ ):  $\delta$  157.5, 154.5, 138.2, 135.1, 131.8, 129.8, 129.0, 126.8, 122.6, 98.9, 77.5, 77.2, 76.9, 64.6, 62.7, 30.8, 25.6, 20.7, 19.7; HRMS-Cl (calcd. for  $\text{C}_{18}\text{H}_{22}\text{O}_5\text{NS}$   $[\text{M}+\text{H}]^+$ ) 364.1213, found 364.1211.

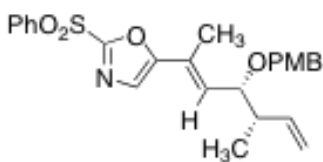

**5-((4*R*,5*S*,*E*)-4-(4-Methoxybenzyloxy)-5-methylhepta-2,6-dien-2-yl)-2-(phenylsulfonyl)oxazole**

**(18).** The same procedure as described for compound

**17** using 5-tributylstannyl-2-phenylsulfonyloxazole (**8**) (1.0 equiv), LiCl (6.0 equiv), CuCl (5.0 equiv),  $\text{Pd}(\text{PPh}_3)_4$  (0.1 equiv), and 1-(((3*S*,4*R*,*E*)-6-iodo-3-methylhepta-1,5-dien-4-yloxy)methyl)-4-methoxybenzene (1.1 equiv); yield (92%);  $^1\text{H}$  NMR (400 MHz,  $\text{CDCl}_3$ ):  $\delta$  8.13 (m, 2H), 7.58-7.76 (m, 3H), 7.23 (d,  $J = 8.6$  Hz, 2H), 7.10 (s, 1H), 6.87 (d,  $J = 8.8$  Hz, 2H), 6.15 (dd,  $J_1 = 9.4$  Hz,  $J_2 = 1.2$  Hz, 1H), 5.71-5.85 (m, 1H), 5.94-5.07 (m, 2H), 4.25-4.55 (dd,  $J_1 = 93.6$  Hz,  $J_2 = 11.7$  Hz, 2H), 3.98 (dd,  $J_1 = 9.5$  Hz,  $J_2 = 6.8$  Hz, 1H), 3.81 (s, 3H), 2.44-2.54 (m, 1H), 1.89 (d,  $J = 1.1$  Hz, 3H), 1.09 (d,  $J = 6.8$  Hz, 3H);  $^{13}\text{C}$  NMR (400 MHz,  $\text{CDCl}_3$ ):  $\delta$  159.4, 157.4, 156.1, 139.7, 138.3, 135.0, 131.8, 130.6, 129.8, 129.4, 129.1, 124.5, 124.2, 115.4, 114.0, 77.8, 70.4, 55.5, 42.8, 15.8, 14.0; HRMS-Cl (calcd. for  $\text{C}_{25}\text{H}_{28}\text{O}_5\text{NS}$   $[\text{M}+\text{H}]^+$ ) 454.1683, found, 454.1684.

**Representative Procedure for the displacement of sulfone:**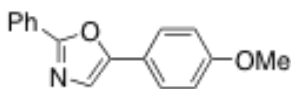

**5-(4-Methoxyphenyl)-2-phenyloxazole (19).** To a stirred solution of 5-(4-Methoxyphenyl)-2-(phenylsulfonyl)oxazole (**15**) (16.6 mg, 0.053 mmol, 1.0 equiv) in THF (2 mL) was slowly added PhLi (1.8 M in butyl ether, 0.04 mL, 0.063 mmol, 1.2 equiv) dropwise. And it was allowed to warm to room temperature and quenched with H<sub>2</sub>O (1 mL). The separated aqueous layer was extracted with Et<sub>2</sub>O (2 x 5 mL), the combined organic extracts were washed with brine (2 mL), and dried over Na<sub>2</sub>SO<sub>4</sub>. Removal of solvent and flash column chromatography over silica gel using hexanes:EtOAc (8:1) to give **19** (11.8 mg, 0.047 mmol, 90%) as yellowish oil; <sup>1</sup>H NMR (400 MHz, CDCl<sub>3</sub>): δ 8.09-8.14 (m, 2H), 7.67 (d, *J* = 8.9 Hz, 2H), 7.45-7.52 (m, 3H), 7.34 (s, 1H), 6.99 (d, *J* = 8.9 Hz, 2H), 3.87 (s, 3H); <sup>13</sup>C NMR (400 MHz, CDCl<sub>3</sub>): δ 160.8, 160.1, 151.6, 130.4, 129.9, 129.0, 127.8, 126.4, 126.0, 122.2, 121.1, 115.6, 114.6, 55.6; HRMS-Cl (calcd. for C<sub>16</sub>H<sub>14</sub>O<sub>2</sub>N [M+H]<sup>+</sup>) 252.1019, found, 252.1022.

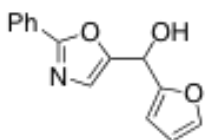

**Furan-2-yl(2-phenyloxazol-5-yl)methanol (20).** General procedure using sulfone (1.0 equiv) and phenyl lithium (2.2 equiv); yield (85%); <sup>1</sup>H NMR (400 MHz, CDCl<sub>3</sub>): δ 8.01-8.09 (m, 2H), 7.44-7.50 (m, 3H), 7.13 (s, 1H), 6.42 (s, 2H), 5.98 (d, *J* = 5.1 Hz, 1H), 2.64 (d, *J* = 5.7 Hz, 1H); <sup>13</sup>C NMR (400 MHz, CDCl<sub>3</sub>): δ 162.3, 152.3, 150.5, 143.2, 130.8, 129.0, 127.5, 126.7, 126.4, 110.8, 108.5, 62.8; HRMS-Cl (calcd. for C<sub>14</sub>H<sub>12</sub>O<sub>3</sub>N [M+H]<sup>+</sup>) 242.0812, found, 242.0800.

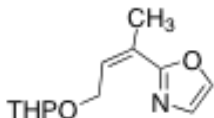

**(Z)-2-(4-(Tetrahydro-2H-pyran-2-yloxy)but-2-en-2-**

**yl)oxazole (21).** General procedure using sulfone (1.0 equiv)

and the corresponding alkenyl lithium (generated by treating the corresponding alkenyl iodide (1.5 equiv) with *t*-BuLi (3.0 equiv) at -78 °C); yield (78%); <sup>1</sup>H NMR (400 MHz, CDCl<sub>3</sub>): δ 7.65 (s, 1H), 7.19 (s, 1H), 6.01-6.07 (m, 1H), 4.57-4.82 (m, 3H), 3.86-3.95 (m, 1H), 3.50-3.59 (m, 1H), 2.18 (d, *J* = 1.5 Hz, 3H), 1.49-1.94 (m, 6H); <sup>13</sup>C NMR (400 MHz, CDCl<sub>3</sub>): δ 162.4, 138.3, 134.1, 128.2, 122.7, 98.9, 66.0, 62.6, 31.0, 25.7, 20.8, 19.8; HRMS-Cl (calcd. for C<sub>12</sub>H<sub>18</sub>O<sub>3</sub>N [M+H]<sup>+</sup>) 224.1281, found, 224.1282.

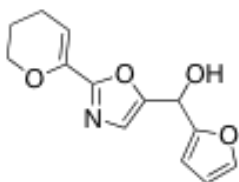

**(2-(3,4-Dihydro-2H-pyran-6-yl)oxazol-5-yl)(furan-2-yl)-**  
**methanol (22).** General procedure using sulfone (1.0 equiv)

and the corresponding alkenyl lithium (generated by treating the corresponding alkenyl iodide (3.0 equiv) with *t*-BuLi (3.0 equiv) at -50 °C); yield (71%); <sup>1</sup>H NMR (400 MHz, CDCl<sub>3</sub>): δ 7.46 (m, 1H), 7.03 (s, 1H), 6.35-6.42 (m, 2H), 5.85-5.95 (m, 2H), 4.21 (t, *J* = 5.3 Hz, 2H), 2.44 (d, *J* = 6.6 Hz, 1H), 2.20-2.29 (m, 2H), 1.90-1.99 (m, 2H); <sup>13</sup>C NMR (500 MHz, CDCl<sub>3</sub>): δ 158.3, 152.0, 143.0, 142.3, 125.7, 110.6, 110.0, 108.3, 105.0, 66.8, 62.4, 21.9, 20.3; HRMS-Cl (calcd. for C<sub>13</sub>H<sub>14</sub>O<sub>4</sub>N [M+H]<sup>+</sup>) 248.2546, found, 248.2541.

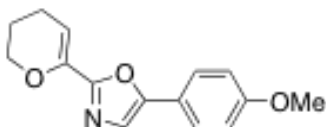

**2-(3,4-dihydro-2H-pyran-6-yl)-5-(4-methoxy-**  
**phenyl)oxazole (23).** General procedure using

sulfone (1.0 equiv) and the corresponding alkenyl lithium (generated by treating the corresponding alkenyl iodide (1.5 equiv) with *t*-BuLi (1.5 equiv) at -50 °C); yield

(83%);  $^1\text{H}$  NMR (400 MHz,  $\text{CDCl}_3$ ):  $\delta$  7.59 (d,  $J = 9.0$  Hz, 2H), 7.23 (s, 1H), 6.95 (d,  $J = 9.0$  Hz, 2H), 5.90 (t,  $J = 4.3$  Hz, 1H), 4.24 (t,  $J = 5.1$  Hz, 2H), 3.85 (s, 3H), 2.25-2.32 (m, 2H), 1.92-2.00 (m, 2H);  $^{13}\text{C}$  NMR (500 MHz,  $\text{CDCl}_3$ ):  $\delta$  159.8, 157.0, 142.5, 125.8, 121.4, 114.3, 104.0, 66.8, 55.4, 22.0, 20.4; HRMS-Cl (calcd. for  $\text{C}_{15}\text{H}_{16}\text{O}_3\text{N}$   $[\text{M}+\text{H}]^+$ ) 258.2924, found, 258.2921.

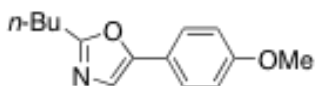

**2-Butyl-5-(4-methoxyphenyl)oxazole (24).** General procedure using sulfone (1.0 equiv) and *n*-BuLi (1.2 equiv); yield (69%);  $^1\text{H}$  NMR (400 MHz,  $\text{CDCl}_3$ ):  $\delta$  7.55 (d,  $J = 9.0$  Hz, 2H), 7.09 (s, 1H), 6.94 (d,  $J = 9.0$  Hz, 2H), 3.85 (s, 3H), 2.82 (t,  $J = 7.6$  Hz, 2H), 1.76-1.86 (m, 2H), 1.41-1.51 (m, 2H), 0.97 (t,  $J = 7.2$  Hz, 3H);  $^{13}\text{C}$  NMR (500 MHz,  $\text{CDCl}_3$ ):  $\delta$  159.5, 150.8, 125.5, 121.3, 120.2, 114.3, 55.4, 29.2, 28.0, 22.3, 13.7; HRMS-Cl (calcd. for  $\text{C}_{14}\text{H}_{18}\text{O}_2\text{N}$   $[\text{M}+\text{H}]^+$ ) 232.1332, found, 232.1325.

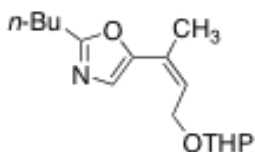

**(Z)-2-Butyl-5-(4-(tetrahydro-2H-pyran-2-yloxy)but-2-en-2-yl)oxazole (25).** General procedure using sulfone (1.0 equiv) and *n*-BuLi (1.2 equiv); yield (76%);  $^1\text{H}$  NMR (400 MHz,  $\text{CDCl}_3$ ):  $\delta$  6.89 (s, 1H), 5.65 (m, 1H), 4.44 (m, 1H), 4.05-4.17 (m, 1H), 3.70-3.91 (m, 2H), 3.35-3.45 (m, 1H), 2.75 (t,  $J = 7.6$  Hz, 2H), 1.99 (s, 3H), 1.38-1.99 (m, 10H), 0.98 (t,  $J = 7.2$  Hz, 3H);  $^{13}\text{C}$  NMR (500 MHz,  $\text{CDCl}_3$ ):  $\delta$  149.3, 127.8, 124.7, 123.9, 122.7, 98.5, 65.2, 62.4, 30.7, 29.4, 28.1, 25.4, 22.0, 20.9, 19.6, 13.8; HRMS-Cl (calcd. for  $\text{C}_{16}\text{H}_{26}\text{O}_3\text{N}$   $[\text{M}+\text{H}]^+$ ) 280.3825, found, 280.3820.

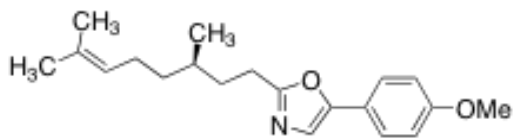

**(R)-2-(3,7-dimethyloct-6-enyl)-5-(4-methoxyphenyl)oxazole (26).** General

procedure using sulfone (1.0 equiv) and the corresponding alkyl lithium (generated by treating the corresponding alkyl iodide (1.5 equiv) with *t*-BuLi (3.0 equiv) at -50 °C); yield (79%); <sup>1</sup>H NMR (400 MHz, CDCl<sub>3</sub>): δ 7.55 (d, *J* = 9.0 Hz, 2H), 7.09 (s, 1H), 6.94 (d, *J* = 9.0 Hz, 2H), 5.02 (m, 1H), 3.85 (s, 3H), 2.65-2.82 (m, 2H), 1.80-2.10 (m, 3H), 1.18-1.72 (m, 10H), 0.96 (d, *J* = 6.7 Hz, 3H); <sup>13</sup>C NMR (500 MHz, CDCl<sub>3</sub>): δ 164.3, 159.5, 150.9, 131.4, 125.7, 124.7, 121.3, 120.4, 114.3, 55.6, 37.0, 34.2, 32.3, 28.9, 26.2, 25.9, 25.6, 19.4, 17.9; HRMS-Cl (calcd. for C<sub>20</sub>H<sub>28</sub>O<sub>2</sub>N [M+H]<sup>+</sup>) 314.2115, found, 314.2124.

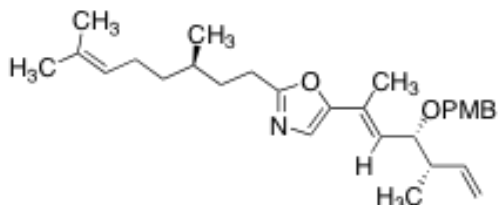

**2-((R)-3,7-dimethyloct-6-enyl)-5-((4R,5S,E)-4-(4-methoxybenzyloxy)-5-methylhepta-2,6-dien-2-yl)oxazole (27).**

General procedure using sulfone (1.0 equiv) and the corresponding alkyl lithium (generated by treating the corresponding alkyl iodide (1.5 equiv) with *t*-BuLi (3.0 equiv) at -50 °C); yield (81%); <sup>1</sup>H NMR (400 MHz, CDCl<sub>3</sub>): δ 7.25 (d, *J* = 8.6 Hz, 2H), 6.88 (d, *J* = 8.6 Hz, 2H), 6.64 (s, 1H), 5.77-5.88 (m, 2H), 4.96-5.14 (m, 3H), 4.40 (dd, *J*<sub>1</sub> = 100.5 Hz, *J*<sub>2</sub> = 16.2 Hz, 2H), 4.36-4.49 (m, 2H), 3.97 (dd, *J*<sub>1</sub> = 9.4 Hz, *J*<sub>2</sub> = 6.6 Hz, 1H), 3.81 (s, 3H), 2.42-2.51 (m, 1H), 1.84-2.10 (m, 3H), 1.82 (s, 3H), 1.24-1.74 (m, 10H), 1.08 (d, *J* = 6.6 Hz, 3H), 0.96 (d, *J*<sub>1</sub> = 6.6 Hz, 3H); <sup>13</sup>C NMR (500 MHz, CDCl<sub>3</sub>): δ 161.6, 159.0, 147.4, 140.1, 131.4, 130.9, 129.2, 128.5, 128.4, 125.3, 124.5, 124.3, 121.7,

114.7, 113.7, 77.6, 70.0, 69.5, 55.3, 42.7, 37.0, 35.6, 29.2, 25.7, 25.4, 19.4, 17.7, 15.6, 13.1; HRMS-Cl (calcd. for C<sub>29</sub>H<sub>42</sub>O<sub>3</sub>N [M+H]<sup>+</sup>) 452.3159, found, 452.3178.

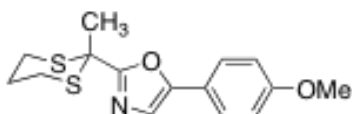

**5-(4-Methoxyphenyl)-2-(2-methyl-1,3-dithian-2-yl)**

**oxazole (28).** General procedure using sulfone (1.0

equiv) and the corresponding alkyl lithium (generated by treating 2-methyl-1,3-dithiane (1.5 equiv) with *n*-BuLi (1.5 equiv) at -20 °C); yield (82%); <sup>1</sup>H NMR (400 MHz, CDCl<sub>3</sub>): δ 7.56 (d, *J* = 9.0 Hz, 2H), 7.15 (s, 1H), 6.96 (d, *J* = 9.0 Hz, 2H), 3.86 (s, 3H), 3.47 (m, 2H), 2.73 (m, 2H), 2.19 (m, 1H), 1.88-2.08 (m, 4H); <sup>13</sup>C NMR (400 MHz, CDCl<sub>3</sub>): δ 164.6, 159.9, 151.0, 125.8, 120.8, 120.1, 114.4, 55.4, 43.9, 28.4, 27.3, 24.4; HRMS-ESI (calcd. for C<sub>15</sub>H<sub>18</sub>O<sub>2</sub>NS<sub>2</sub> [M+H]<sup>+</sup>) 308.0779, found, 308.0782.



STANDARD 1H OBSERVE

Archive directory: /vxr400/vnmr1/vnmrSYS/data  
Sample directory:Pulse Sequence: s2pul  
Solvent: cdcl3  
Temp. 25.0 C / 298.1 K  
Operator: lff  
Mon Feb 9 09:56:29 2009: Experiment started  
File: pu-I-4-1  
1500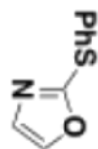PULSE SEQUENCE  
Relax. delay 1.000 sec  
Pulse 45.0 degrees  
Acq. time 2.730 sec  
Width 6000.6 Hz  
16 repetitions  
OBSERVE H1, 400.1083627 MHz  
DATA PROCESSING  
Line broadening 0.3 Hz  
FM size 65536  
Total time 0 min, 59 sec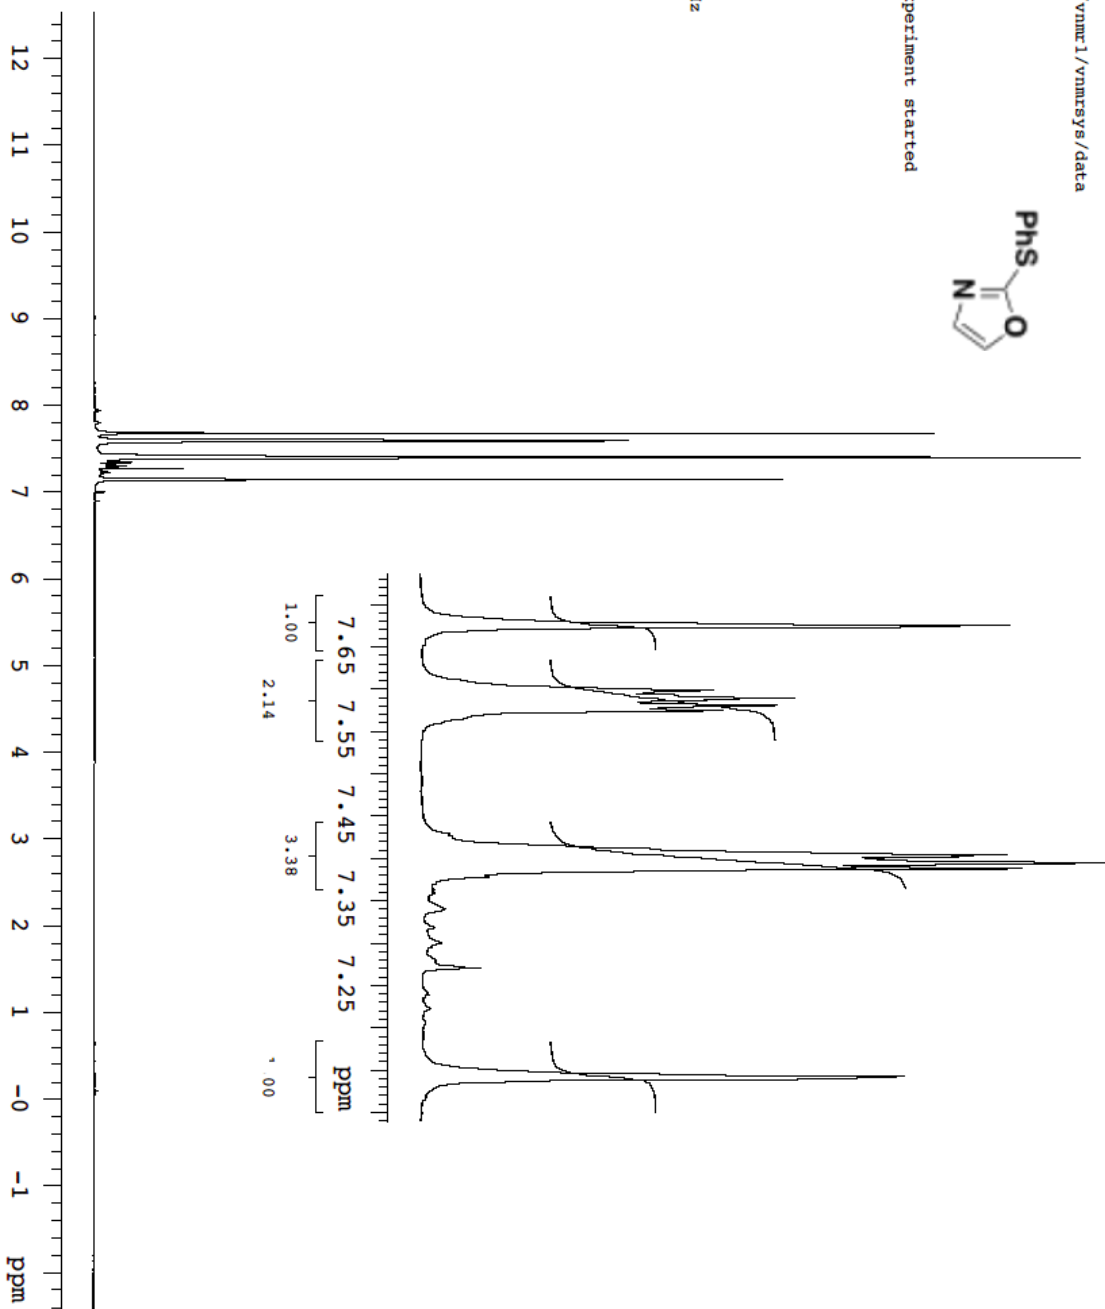

13C OBSERVE

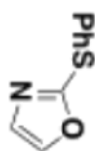Archive directory: /1400/dab/vmkrays/data  
Sample directory:

Pulse Sequence: e2pul

Solvent: cdcl3

Temp: 25.0 C / 298.1 K

Operator: lff

Mon Feb 9 10:00:09 2009: Experiment started

File: FU-1-44-2

1500

PULSE SEQUENCE

Polar. delay 1.500 sec

Pulse 29.7 degrees

Acq. time 0.651 sec

Width 25157.2 Hz

10000 repetitions

OBSERVE c13, 100.6073077 MHz

DECOUPLE H1, 400.1103789 MHz

Power 43 dB

continuously on

NMR-16 modulated

DATA PROCESSING

Line broadening 2.0 Hz

F2 size 65536

Total time 6 hr, 1 sec

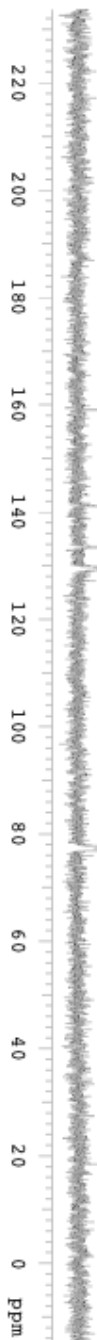

STANDARD 1H OBSERVE

Archive directory: /vvr400/vnmr1/vnmrsys/data  
 Sample directory:

Pulse Sequence: s2pul

Solvent: cdcl3

Temp. 25.0 C / 298.1 K

Operator: lff

Tue Dec 2 17:44:36 2008: Acquisition complete

File: fu-1-2-phenylsulfylloxazole-12022008  
1500

PULSE SEQUENCE

Relax. delay 1.000 sec

Pulse 45.0 degrees

Acq. time 2.730 sec

Width 6000.6 Hz

16 repetitions

OBSERVE H1, 400.1085720 MHz

DATA PROCESSING

Line broadening 0.3 Hz

FT size 65536

Total time 0 min, 59 sec

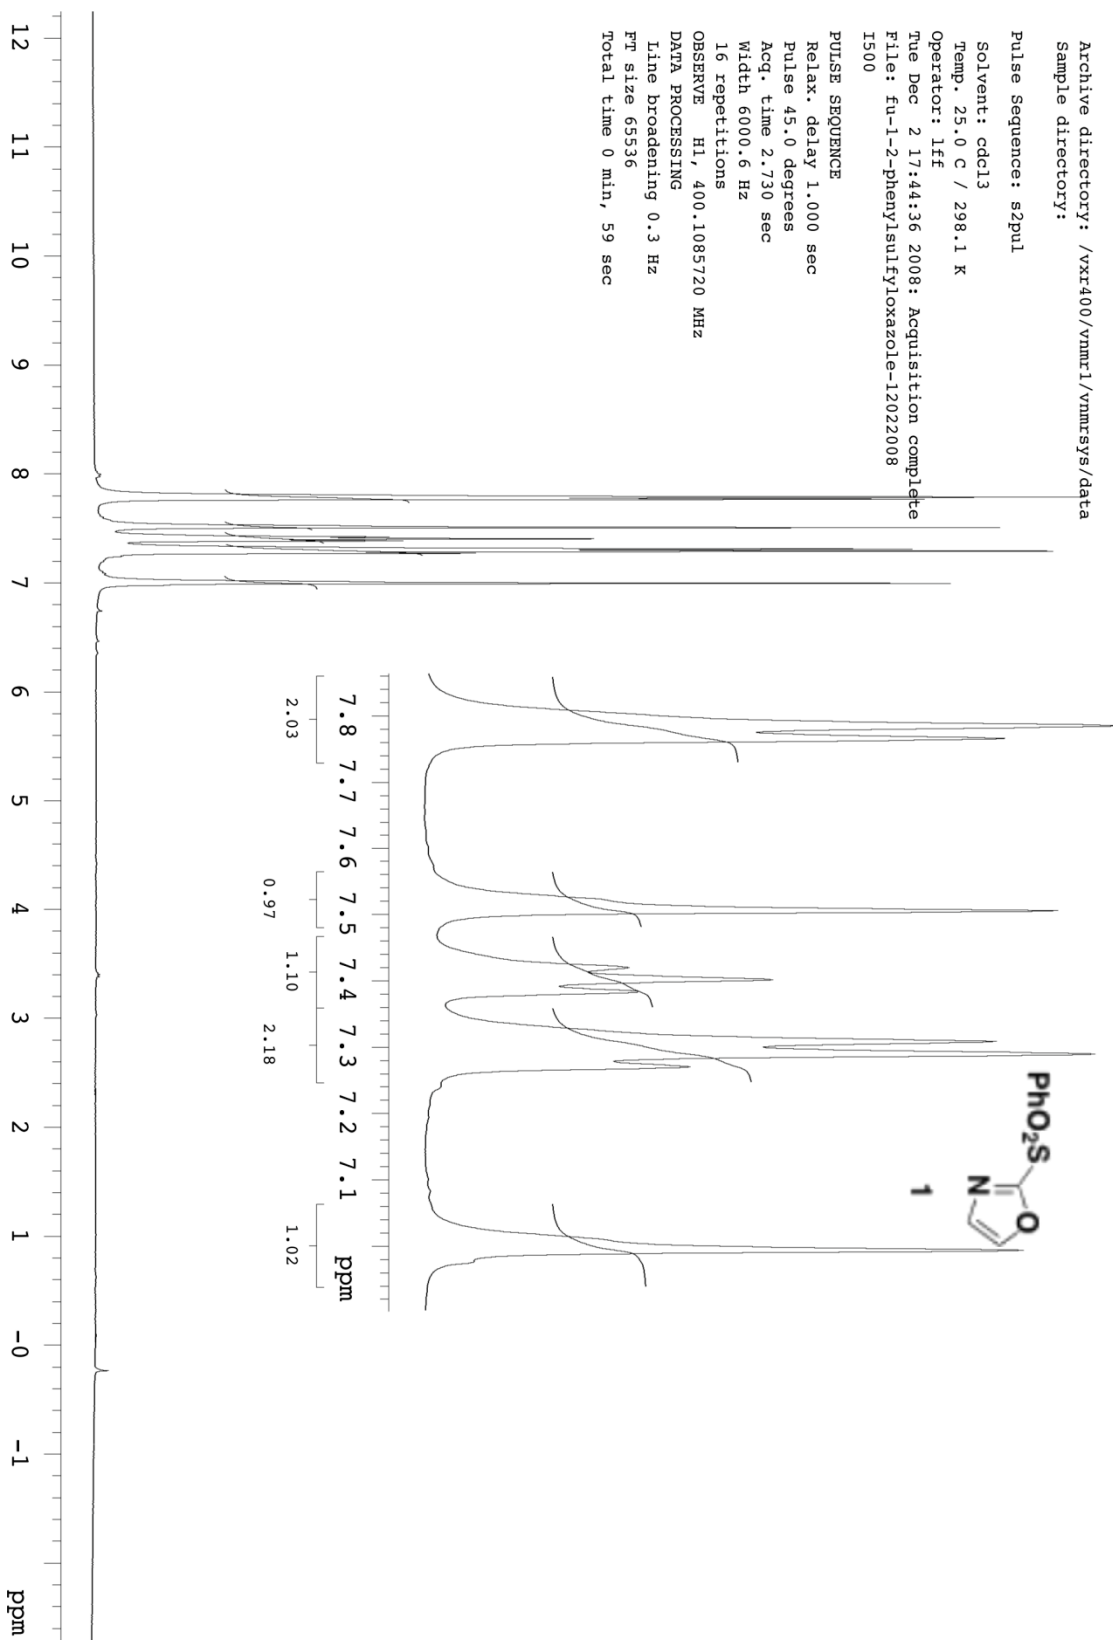

13C OBSERVE

Archive directory: /1400/dab/vnmrsgs/data  
Sample directory:

Pulse Sequence: zgpg30

Solvent: cdcl3  
Temp: 25.0 C / 298.1 K  
Operator: lff  
Tue Dec 2 17:51:57 2008: Acquisition aborted  
File: fu-2-2-phenylsulfloxazole-12022008  
1300

PURGE SEQUENCE

Pulak. delay 1.500 sec  
Pulse 29.7 degrees  
Acq. time 0.651 sec  
Width 25157.2 Hz  
80 repetitions  
OBSERVE c13, 100.607306 MHz  
DECOUPLE H1, 400.1104701 MHz  
Power 43 dB  
continuously on  
MAGTE-16 modulated  
DATA PROCESSING  
Line broadening 2.0 Hz  
PR size 65536  
Total time 9 min, 12 sec

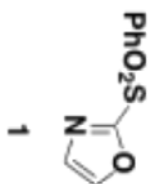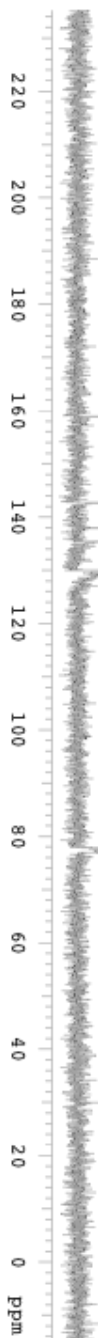

STANDARD 1H OBSERVE

Pulse Sequence: szpnl

Solvent: cdcl3

Temp. 25.0 C / 298.1 K

Operator: iff

Thu Dec 4 14:06:34 2008: Acquisition complete

File: fu-1-2-phenylsulfonyl-5-iodoxazole-12042008

GEM300

PULSE SEQUENCE

Relax. delay 1.000 sec

Pulse 45.0 degrees

Acq. time 2.731 sec

Width 4500.0 Hz

16 repetitions

OBSERVE H1, 300.0673537 MHz

DATA PROCESSING

Line broadening 0.5 Hz

Ft size 65536

Total time 0 min, 59 sec

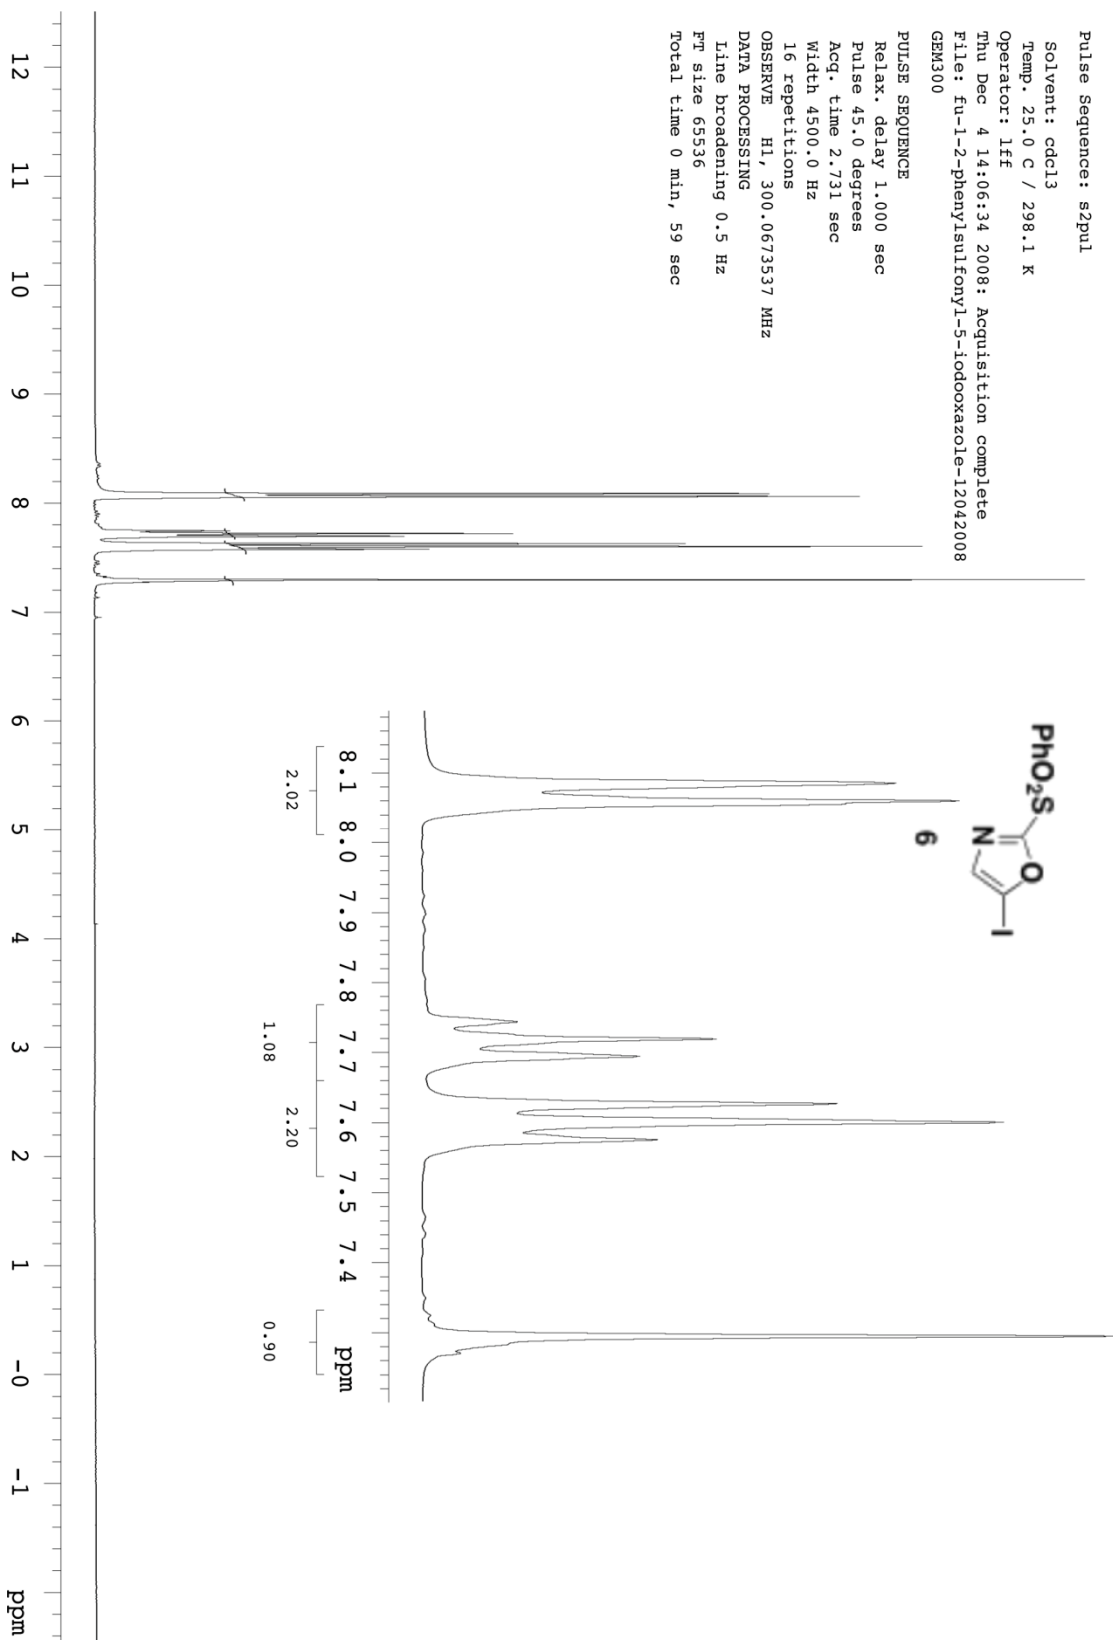

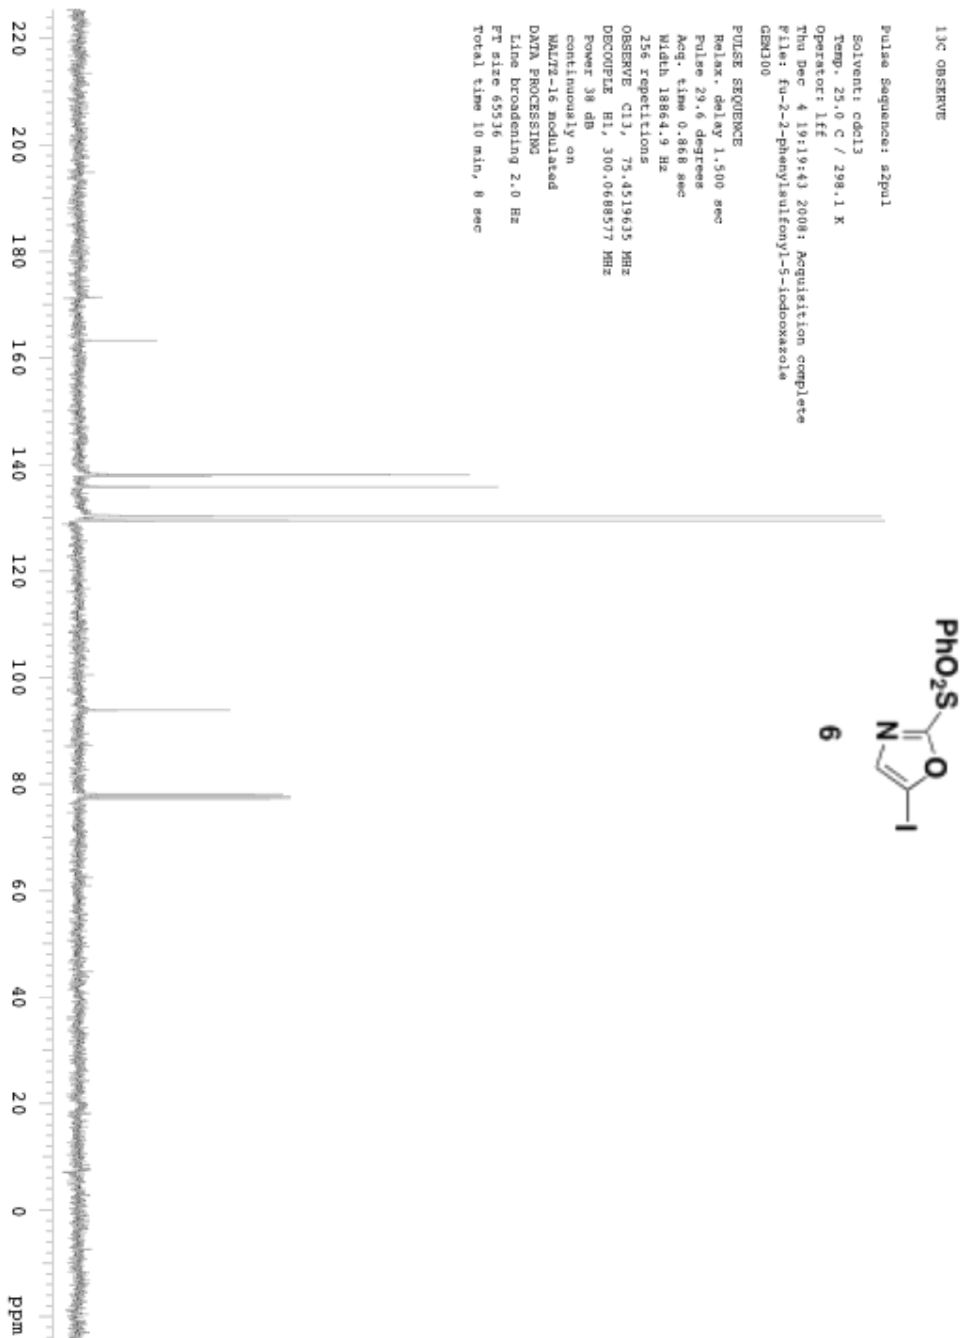

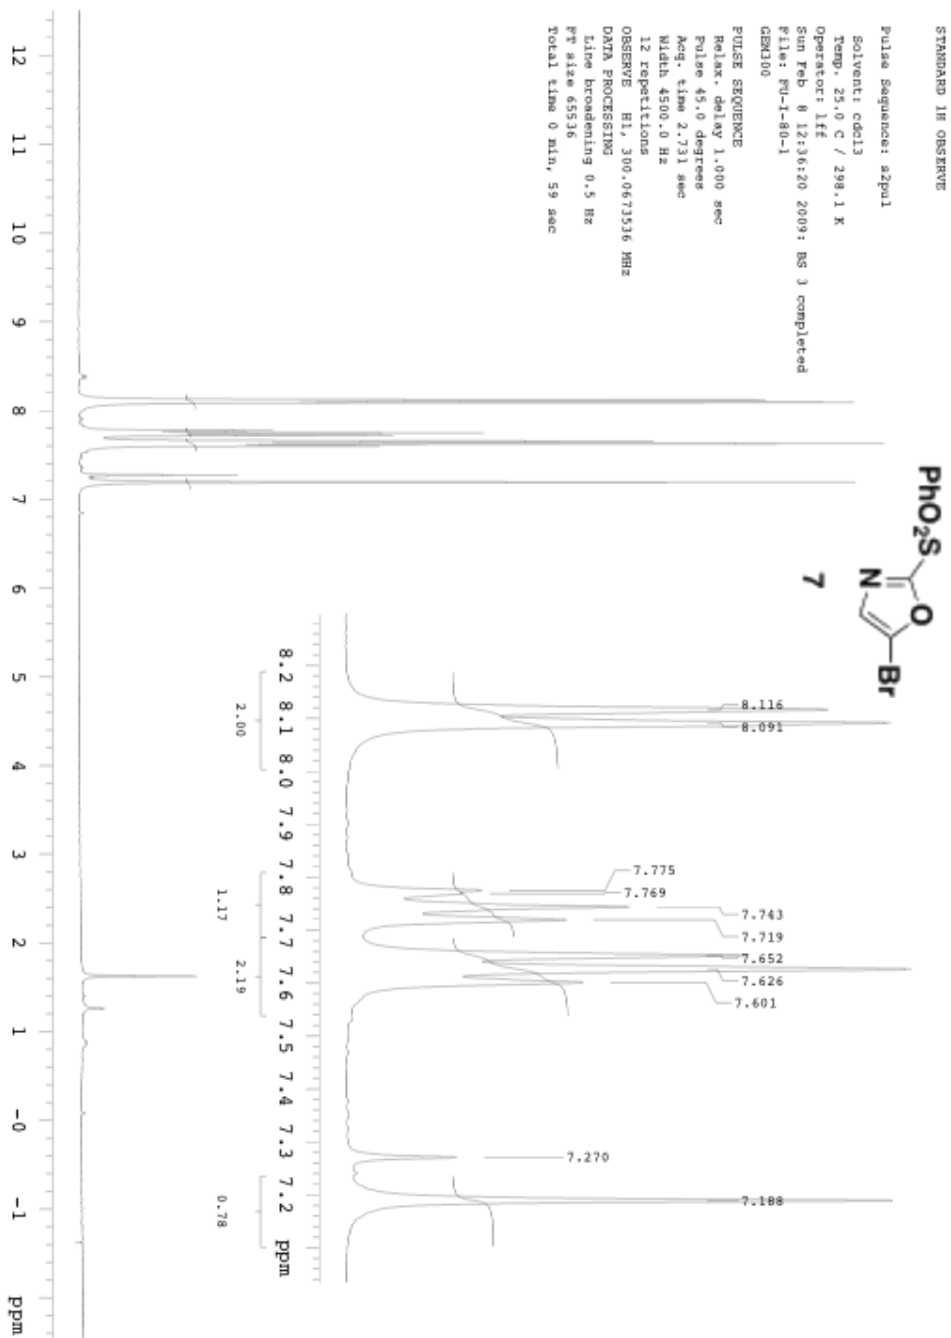

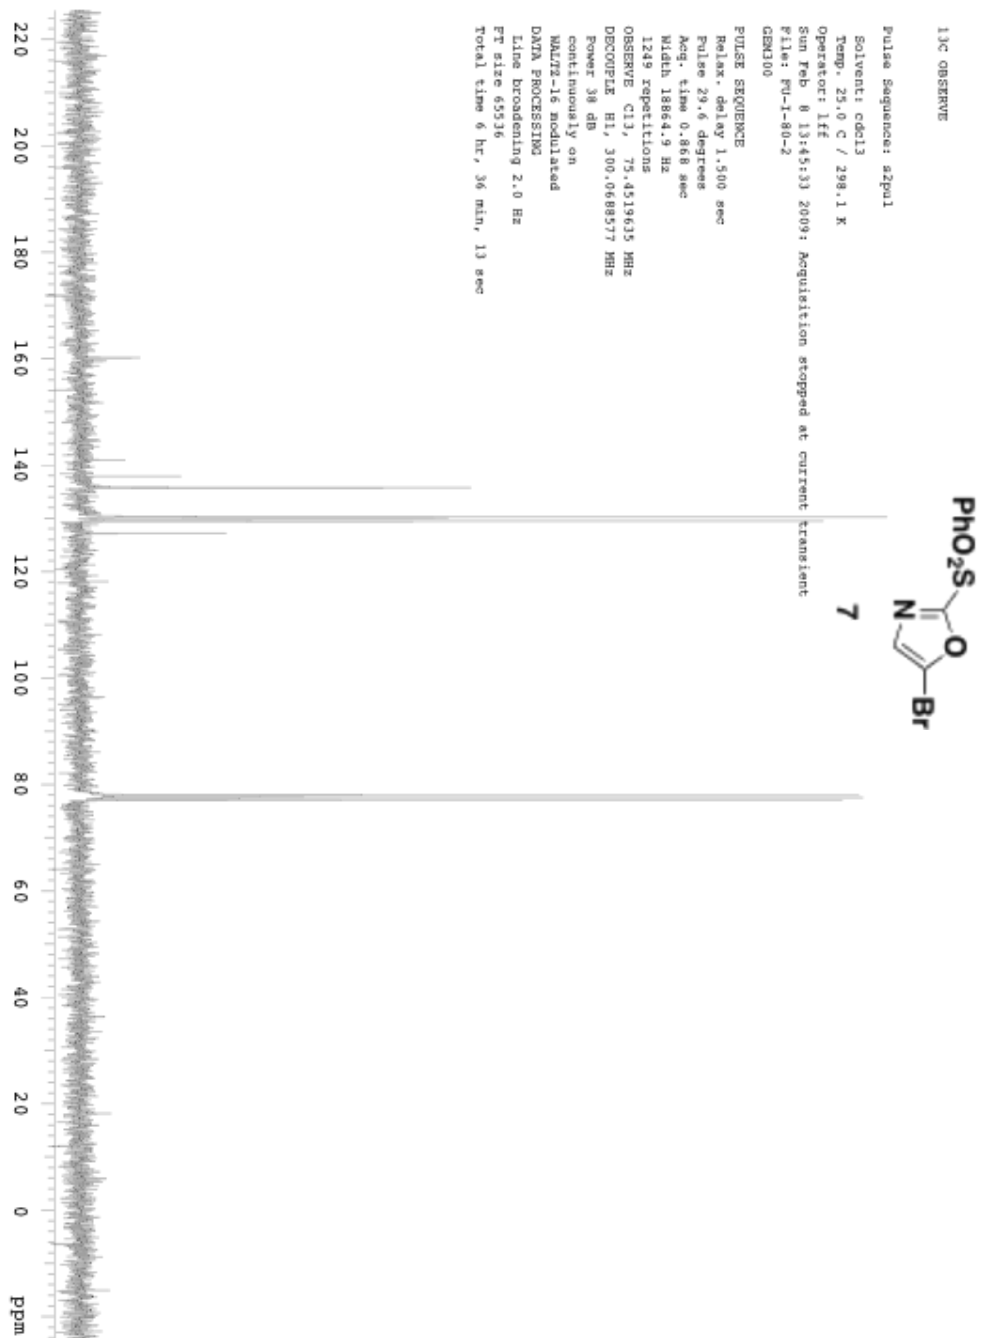



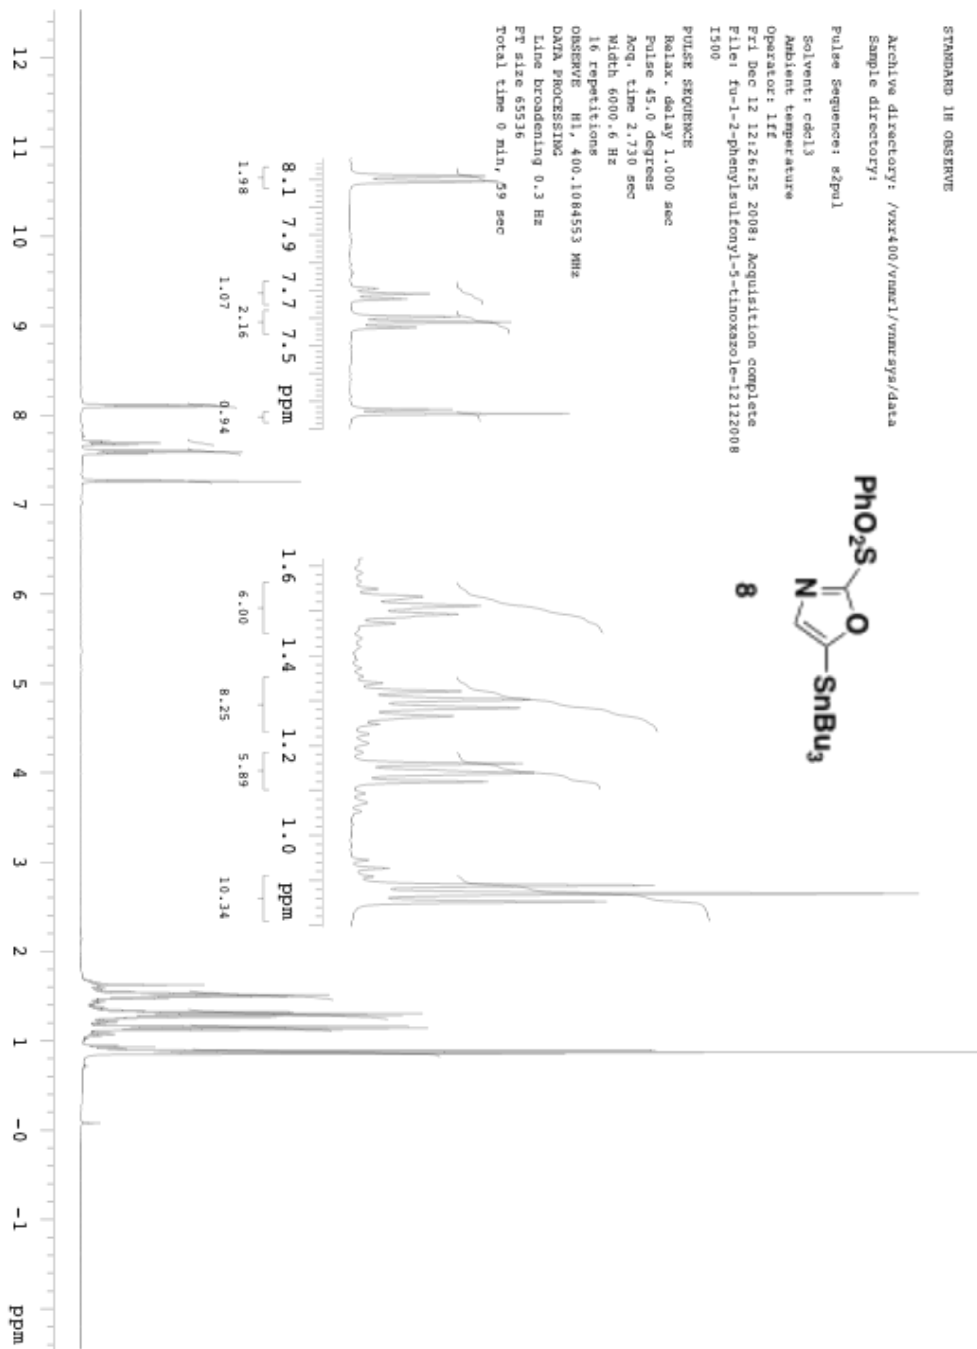

13C OBSERVE

Archive directory: /1400/dob/vmrays/data  
Sample directory:

Pulse Sequence: e2pul

Solvent: cdcl3

Temp: 25.0 C / 298.1 K

Operator: lff

Mon Feb 9 14:18:16 2009; Acquisition stopped at current transient.

File: Fu-1-63-1

1500

PULSE SEQUENCE

Relax. delay 1.500 sec

Pulse 29.7 degrees

Acq. time 0.651 sec

Width 2317.2 Hz

373 repetitions

OBSERVE c13, 100.6073077 MHz

DECOUPLE H1, 400.1103789 MHz

Power 43 dB

continuously on

WALTZ-16 modulated

DATA PROCESSING

Line broadening 2.0 Hz

PT size 65536

Total time 6 hr, 1 sec

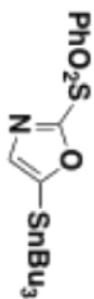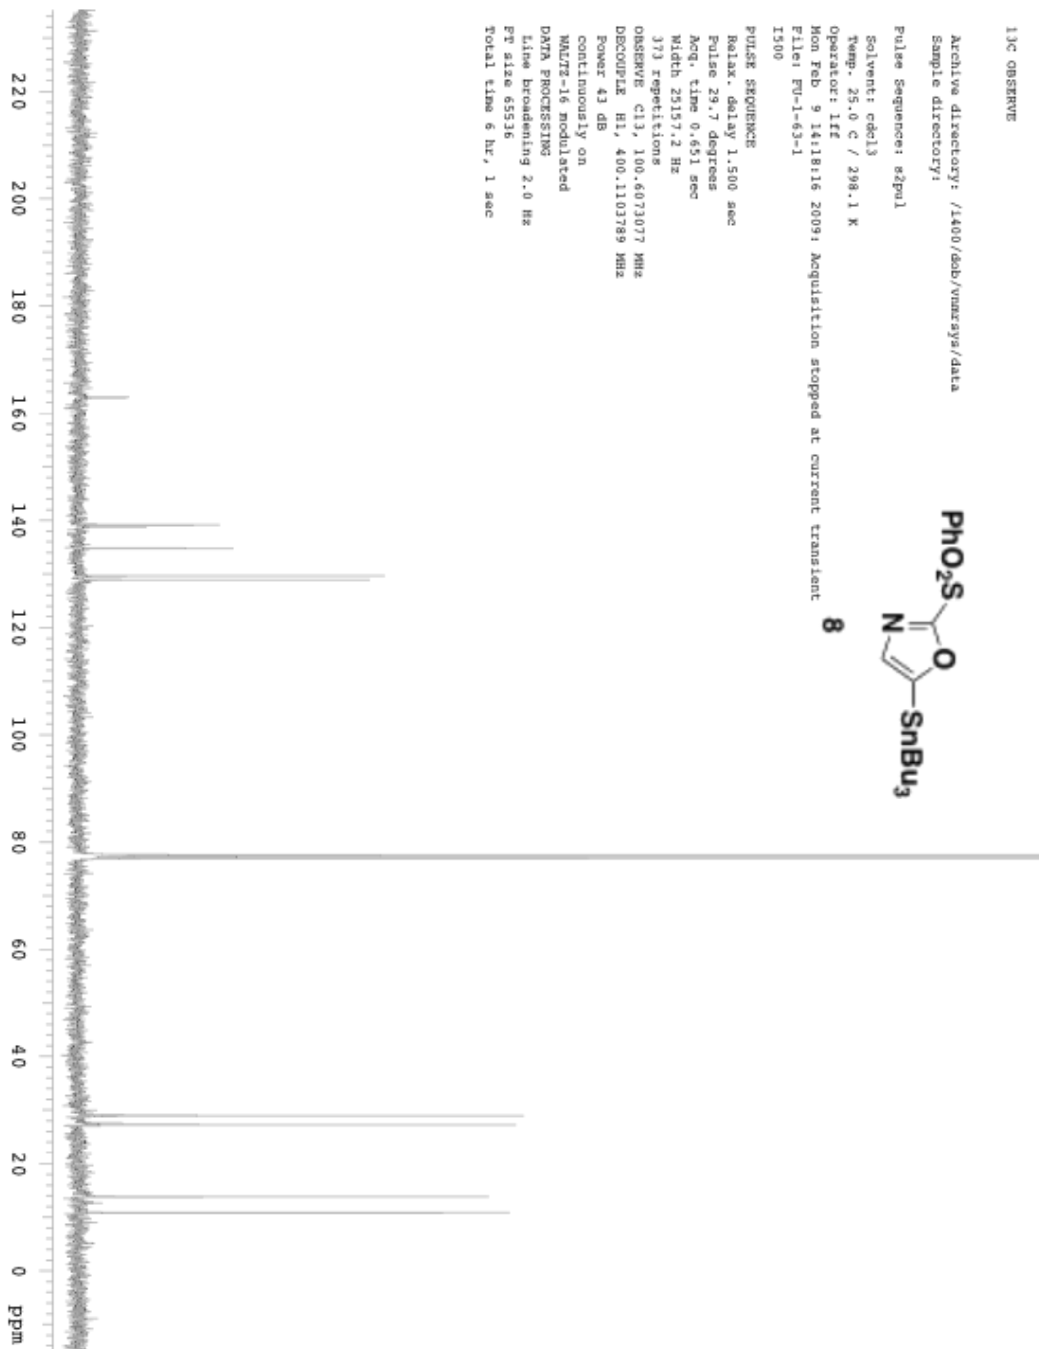

STANDARD 1H OBSERVE

Archive directory: /vxi400/vnmr1/vnmr.sys/data  
 Sample directory:

Pulse Sequence: sZpu1

Solvent: cdcl3

Temp. 25.0 C / 298.1 K

Operator: lff

Mon Feb 9 14:58:00 2009: Acquisition complete

File: fu-I-103-1  
1500

PULSE SEQUENCE

Relax. delay 1.000 sec

Pulse 45.0 degrees

Acq. time 2.730 sec

Width 6000.6 Hz

16 repetitions

OBSERVE H1, 400.1083627 MHz

DATA PROCESSING

Line broadening 0.3 Hz

FT size 65536

Total time 0 min, 59 sec

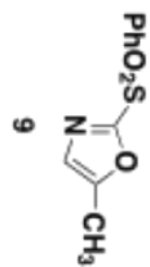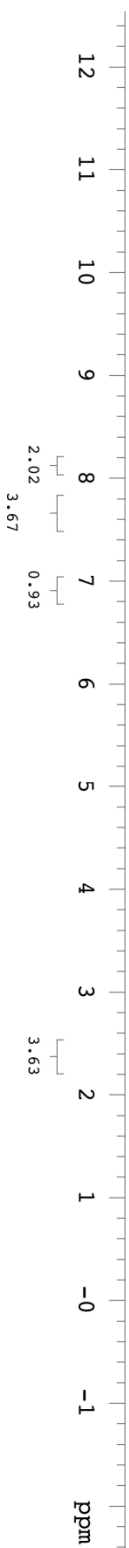

13C OBSERVE

Archive directory: /i400/dob/vnmr/ys/data  
Sample directory:

Pulse Sequence: s2pul  
Solvent: cdcl3  
Temp. 25.0 C / 298.1 K  
Operator: lff  
Mon Feb 9 14:53:02 2009: Acquisition stopped at current transient  
File: FU-I-103-2  
1500

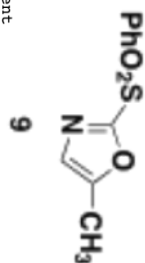

PULSE SEQUENCE  
Relax. delay 1.500 sec  
Pulse 29.7 degrees  
Acq. time 0.651 sec  
Width 25157.2 Hz  
909 repetitions  
OBSERVE C13, 100.6073077 MHz  
DECOUPLE H1, 400.1103789 MHz  
Power 43 dB  
continuously on  
WALTZ-16 modulated  
DATA PROCESSING  
Line broadening 2.0 Hz  
FT size 65536  
Total time 6 hr, 1 sec

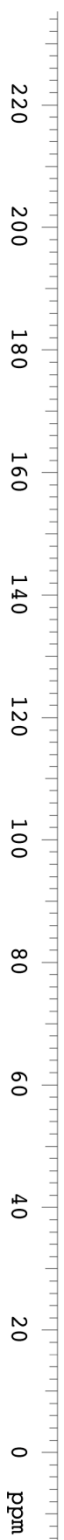

STANDARD 1H OBSERVE

Archive directory: /vxx400/vnmr1/vnmr.sys/data  
 Sample directory:

Pulse Sequence: szpud

File: FU-1-98-1

Date: Feb 9 2009  
 1500

PULSE SEQUENCE: standard  
 OBSERVE H1

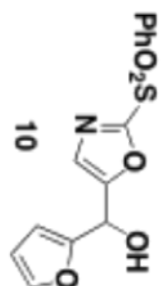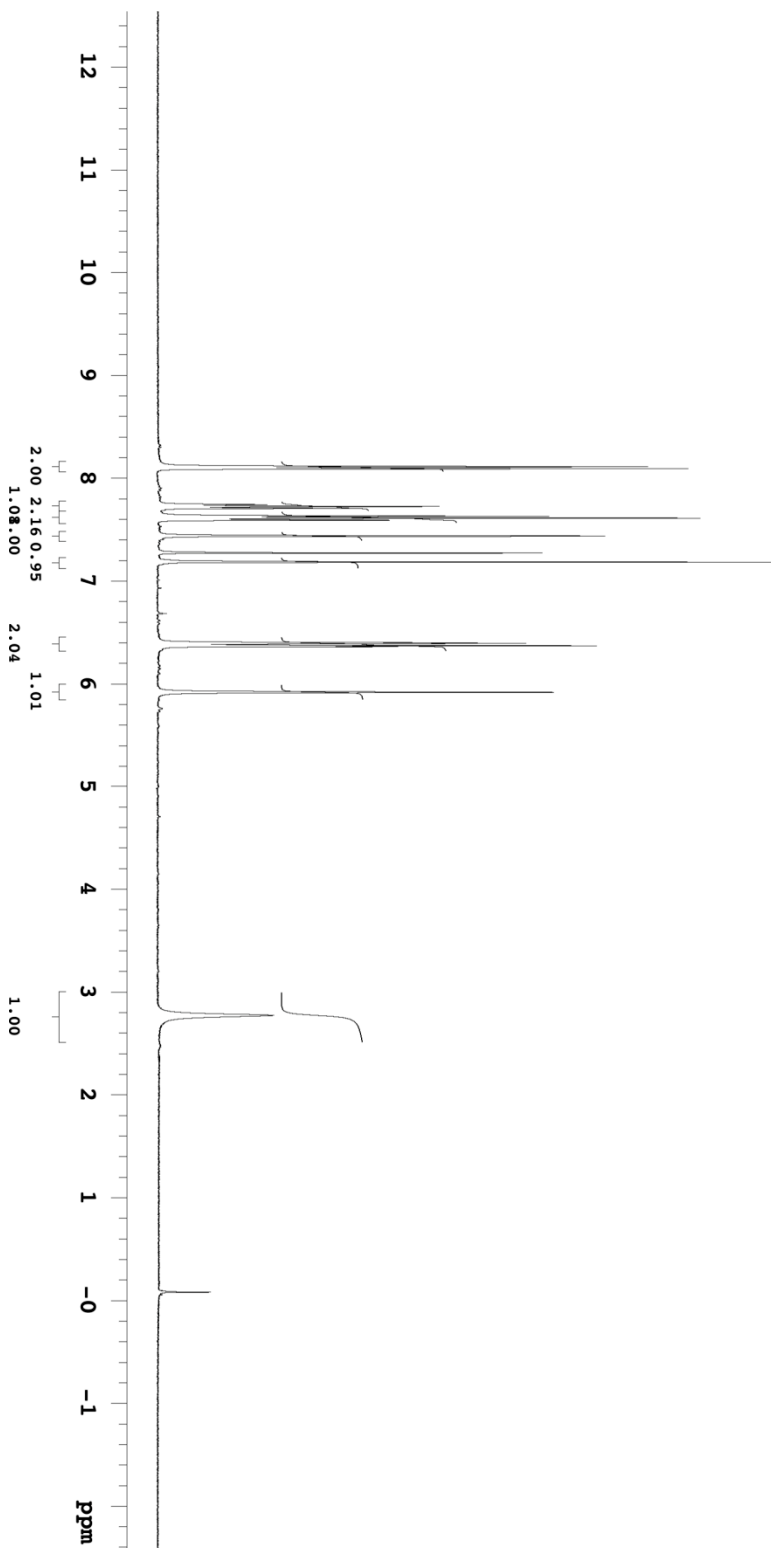

13C OBSERVE

Archive directory: /1400/dab/vmwrays/data

Sample directory:

Pulse Sequence: s2pul

Solvent: cdcl3

Temp: 25.0 C / 298.1 K

Operator: lff

Mon Feb 9 10:18:47 2009: Experiment started

File: FU-I-98-2

1509

PULSE SEQUENCE

Pulprg: delay 1.500 sec

Pulse 29.7 degrees

Acq. time 0.651 sec

Width 25197.2 Hz

10000 repetitions

OBSERVE CH, 100.6073077 MHz

DECOUPLE H1, 400.1103789 MHz

Power 43 dB

continuously on

MULTI-16 modulated

DATA PROCESSING

Line broadening 2.0 Hz

Fw size 65536

Total time 6 hr, 1 sec

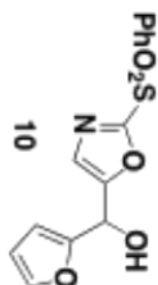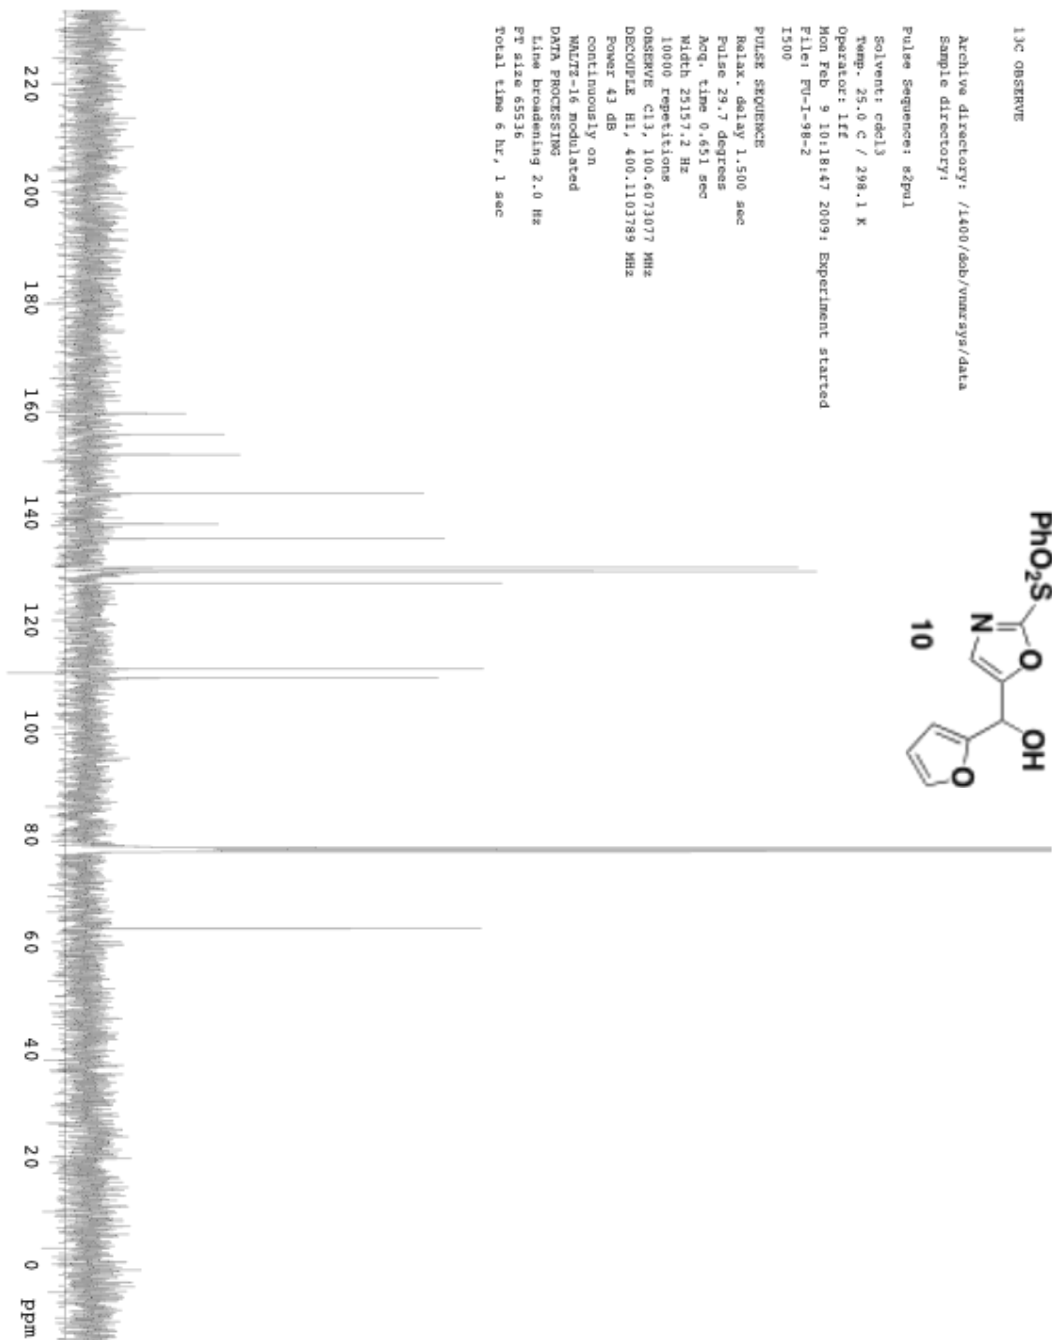

## STANDARD PROTON PARAMETERS

Acquire directory:

Sample directory:

Pulse Sequence: szpul

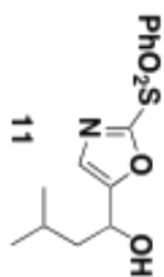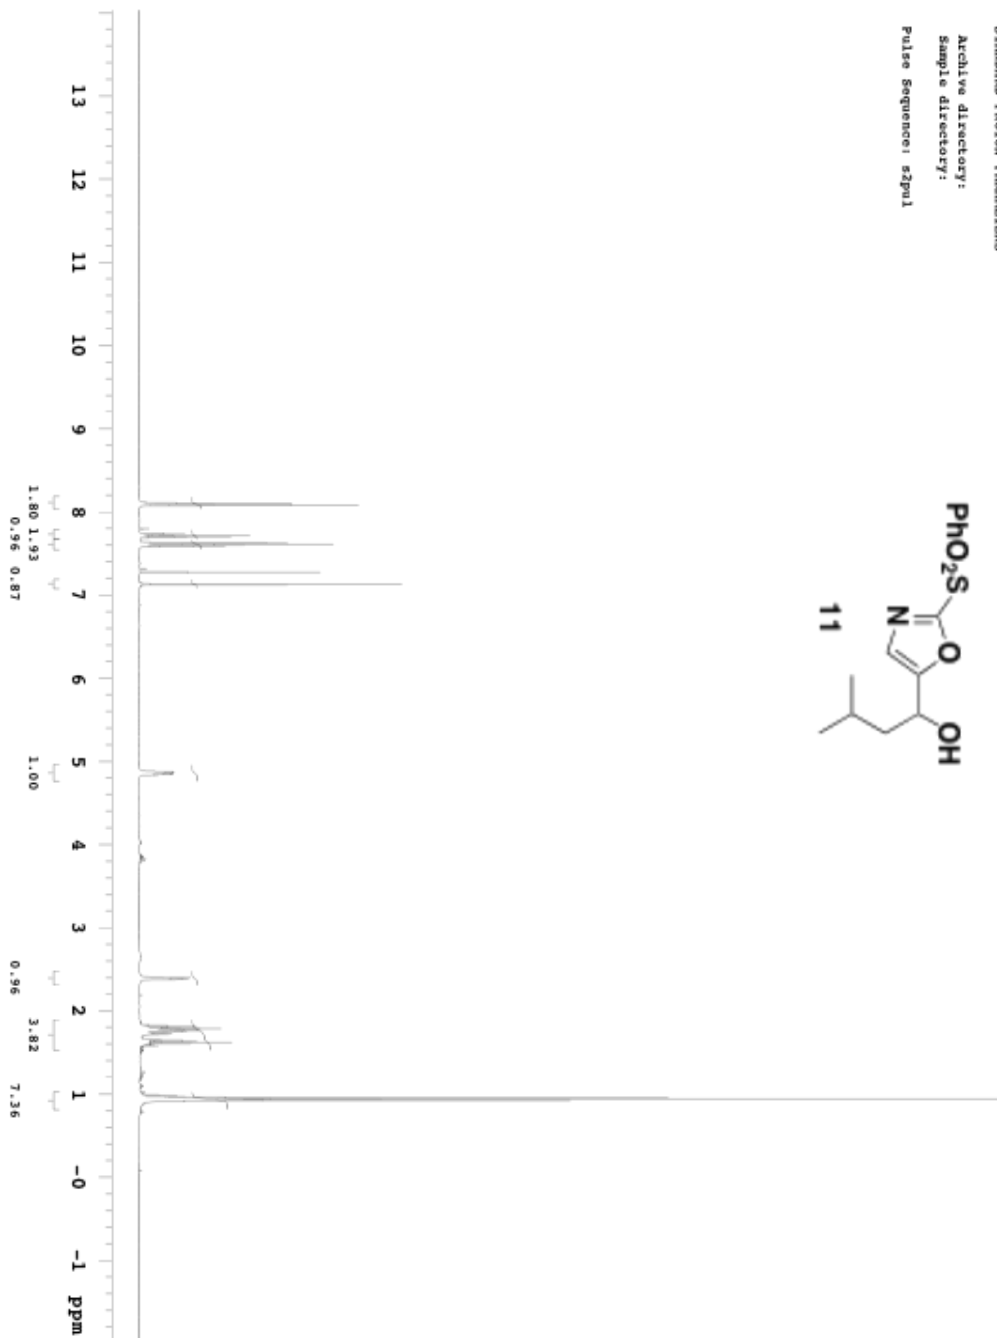

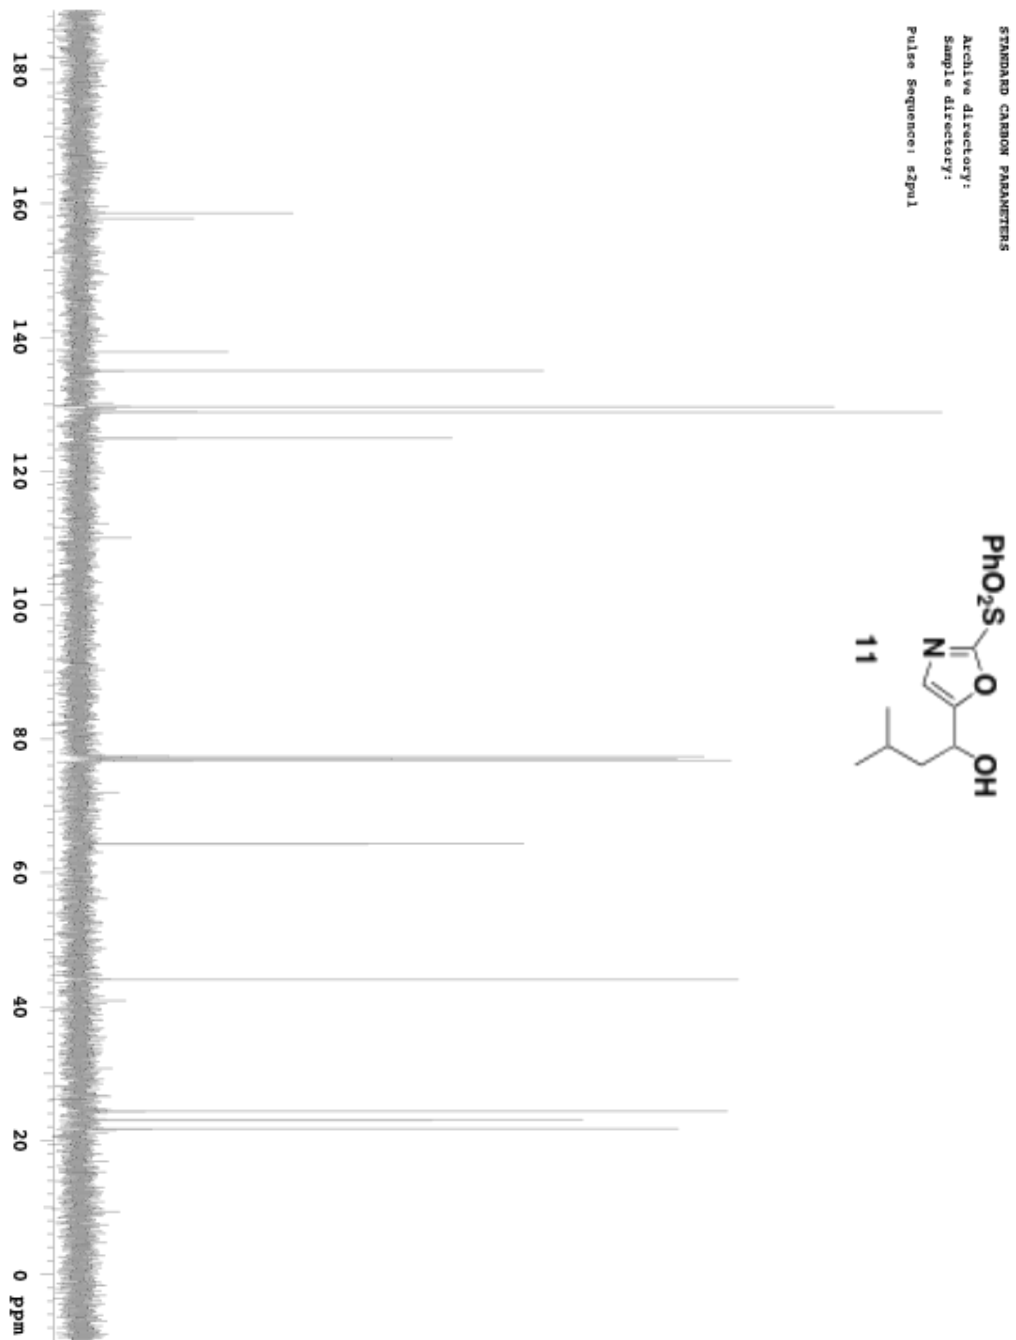



STANDARD IN OBSERVE

Archive directory: /vxx100/vnmr1/vnmr2ps/data  
Sample directory:

Pulse Sequence: s2pul1

Solvent: cdcl3

Temp: 25.0 C / 298.1 K

Operator: lff

Tue Feb 10 15:47:55 2009; Acquisition complete

File: FU-I-160-1

1509

PULSER SEQUENCE

Pulstx. delay 1.000 sec

Pulse 45.0 degrees

Acq. time 2.730 sec

Width 6000.6 Hz

16 repetitions

OBSERVE H1, 400.1083627 MHz

DATA PROCESSING

Line broadening 0.3 Hz

F2 size 65536

Total time 0 min, 59 sec

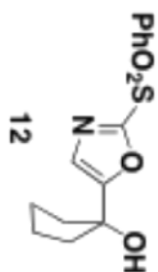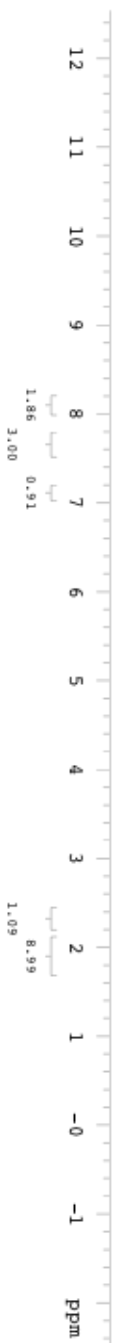

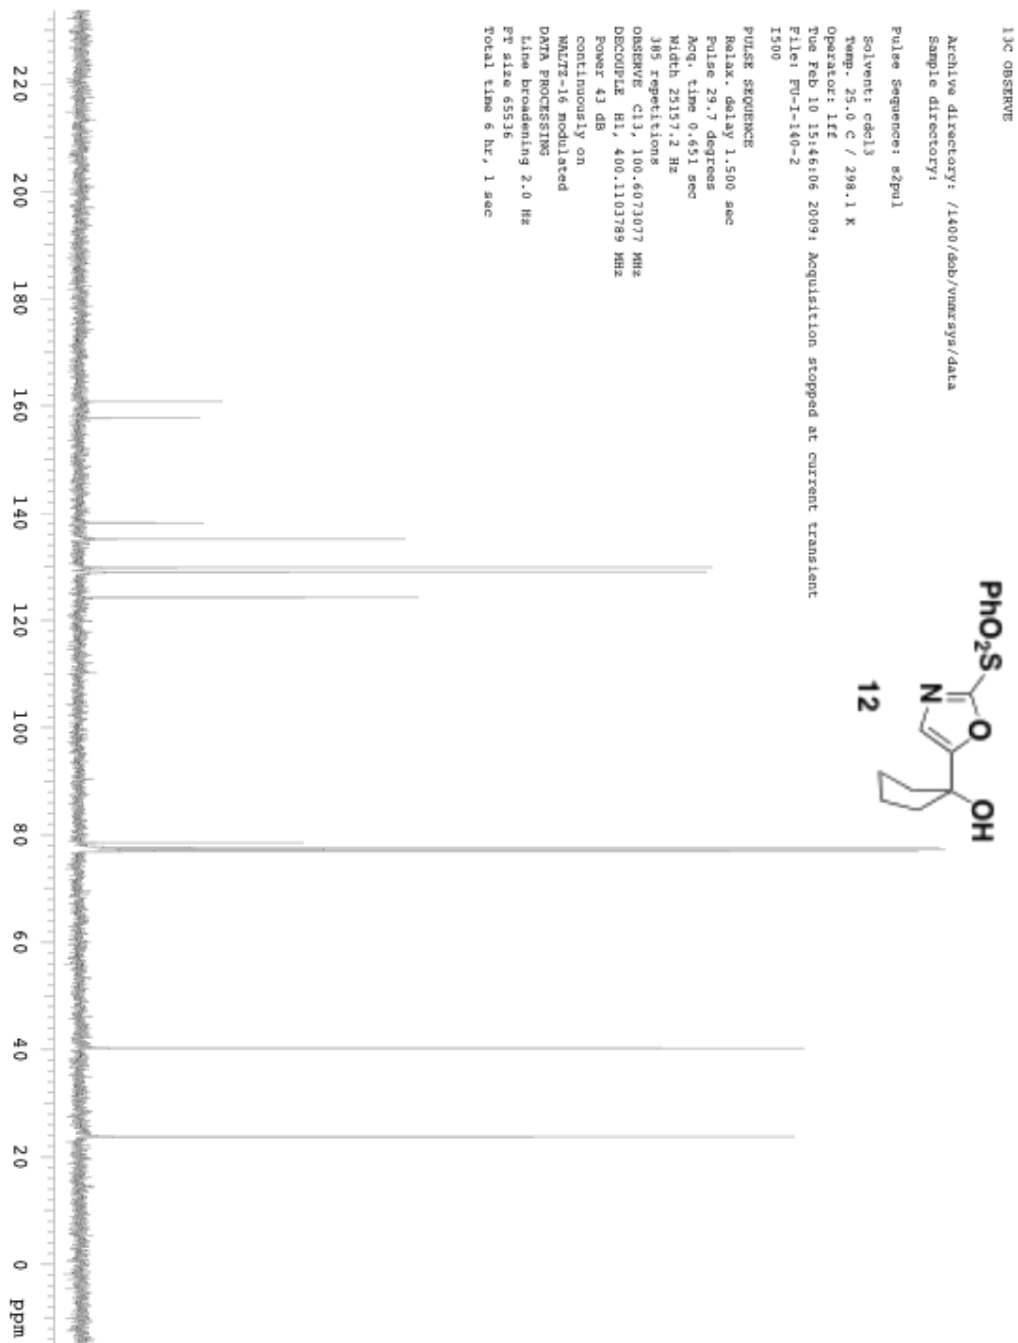

STANDARD IR OBSERVE

Pulse Sequence: zgpg1

Solvent: cdcl3

Temp: 25.0 C / 298.1 K

Operator: lff

Sat Jan 31 13:10:07 2009: Acquisition complete

File: fu-1-2-phenylsulfanyl-5-acetylloxazole

CEN300

PULSE SEQUENCE

Relax. delay 1.000 sec

Pulse 45.0 degrees

Acq. time 2.731 sec

Width 4500.0 Hz

16 repetitions

OBSERVE H1, 300.0672996 MHz

DATA PROCESSING

Line broadening 0.5 Hz

FT size 65536

Total time 0 min, 59 sec

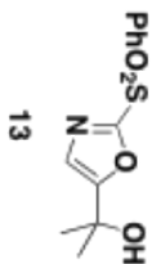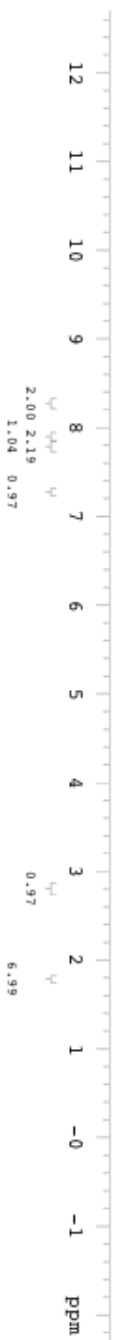

13C OBSERVE

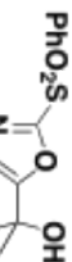

Pulse Sequence: zgpg30  
 Solvent: cdcl3  
 Temp: 25.0 C / 298.1 K  
 Operator: LF  
 Sat Jan 31 13:07:51 2009: Acquisition stopped at current transient  
 File: fu-2-2-phenylsulfanyl-5-acetylthiazole  
 CEN300

PULSE SEQUENCE  
 Relax. delay 1.500 sec  
 Pulse 29.6 degrees  
 Acq. time 0.868 sec  
 Width 18864.9 Hz  
 1403 repetitions  
 OBSERVE C13, 75.4519635 MHz  
 DECOUPLE H1, 300.0688577 MHz  
 Power 38 db  
 continuously on  
 MARE-16 modulated  
 DNA PROCESSING  
 Line broadening 2.0 Hz  
 F2 size 65536  
 Total time 13 hr, 12 min, 26 sec

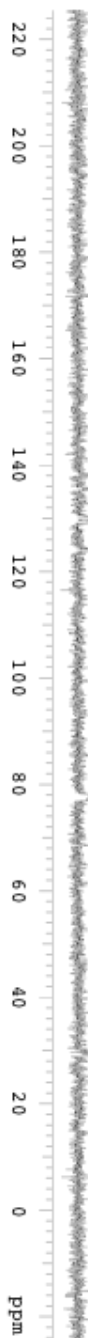

# Supporting Information

STANDARD 1H OBSERVE

Archive directory: /vxx400/vnmr1/vnmrsys/data  
Sample directory:

Pulse Sequence: s2pul

File: FU-I-144-1

Date: Feb 17 2009  
1500

PULSE SEQUENCE: standard  
OBSERVE H1

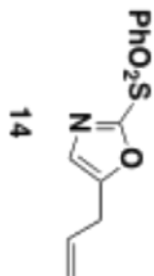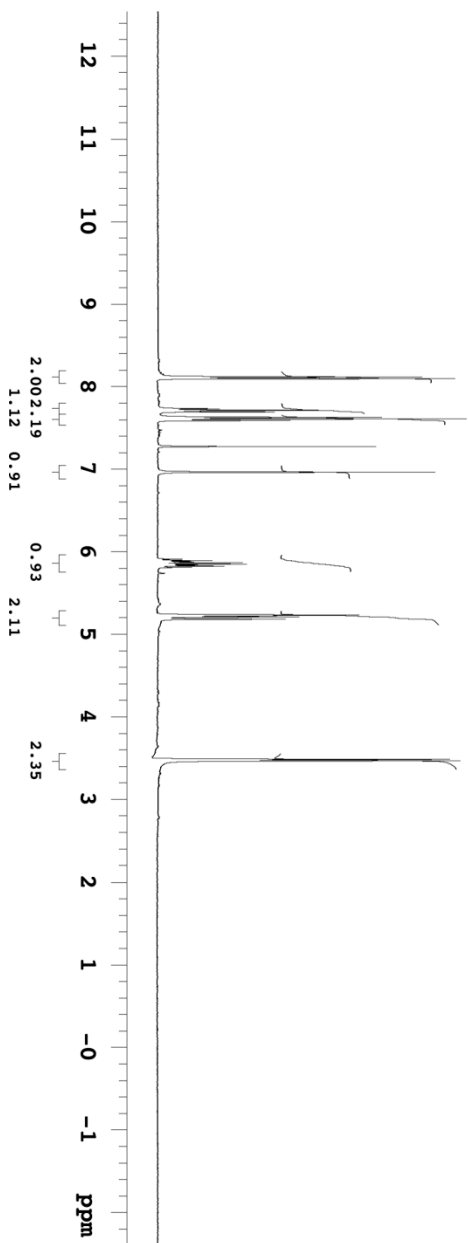

Williams, Fu

13C OBSERVE

Archive directory: /1400/dab/vmwaregs/data  
Sample directory:  
Pulse Sequence: zgpg30  
Solvent: cdcl3  
Temp: 25.0 C / 298.1 K  
Operator: lff  
Sun Feb 15 17:13:58 2009; Acquisition stopped at current transient  
File: FU-1-127-2  
1509

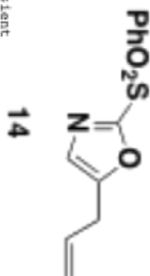

PULSE SEQUENCE  
Polariz. delay 1.500 sec  
Pulse 29.7 degrees  
Acq. time 0.651 sec  
Width 25157.2 Hz  
283 repetitions  
OBSERVE c13, 100.6273077 MHz  
DECOUPLE H1, 400.1103789 MHz  
Power 43 dB  
continuously on  
MULTE-16 modulated  
DATA PROCESSING  
Line broadening 2.0 Hz  
Fw size 65536  
Total time 6 hr, 1 sec

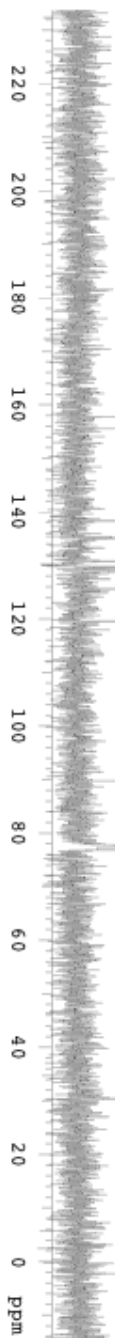

STANDARD 1H OBSERVE

Pulse Sequence: szpul

Solvent: cdcl3

Temp. 25.0 C / 298.1 K

Operator: iff

Mon Dec 8 16:14:11 2008: Acquisition complete

File: fu-1-2-phenylsulfonyl-5-4-methoxyphenylloxazole-12082008

GEM300

PULSE SEQUENCE

Relax. delay 1.000 sec

Pulse 45.0 degrees

Acq. time 2.731 sec

Width 4500.0 Hz

16 repetitions

OBSERVE H1, 300.0673537 MHz

DATA PROCESSING

Line broadening 0.5 Hz

FT size 65536

Total time 0 min, 59 sec

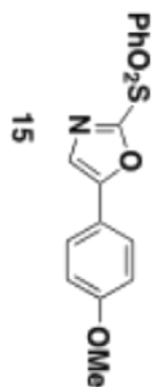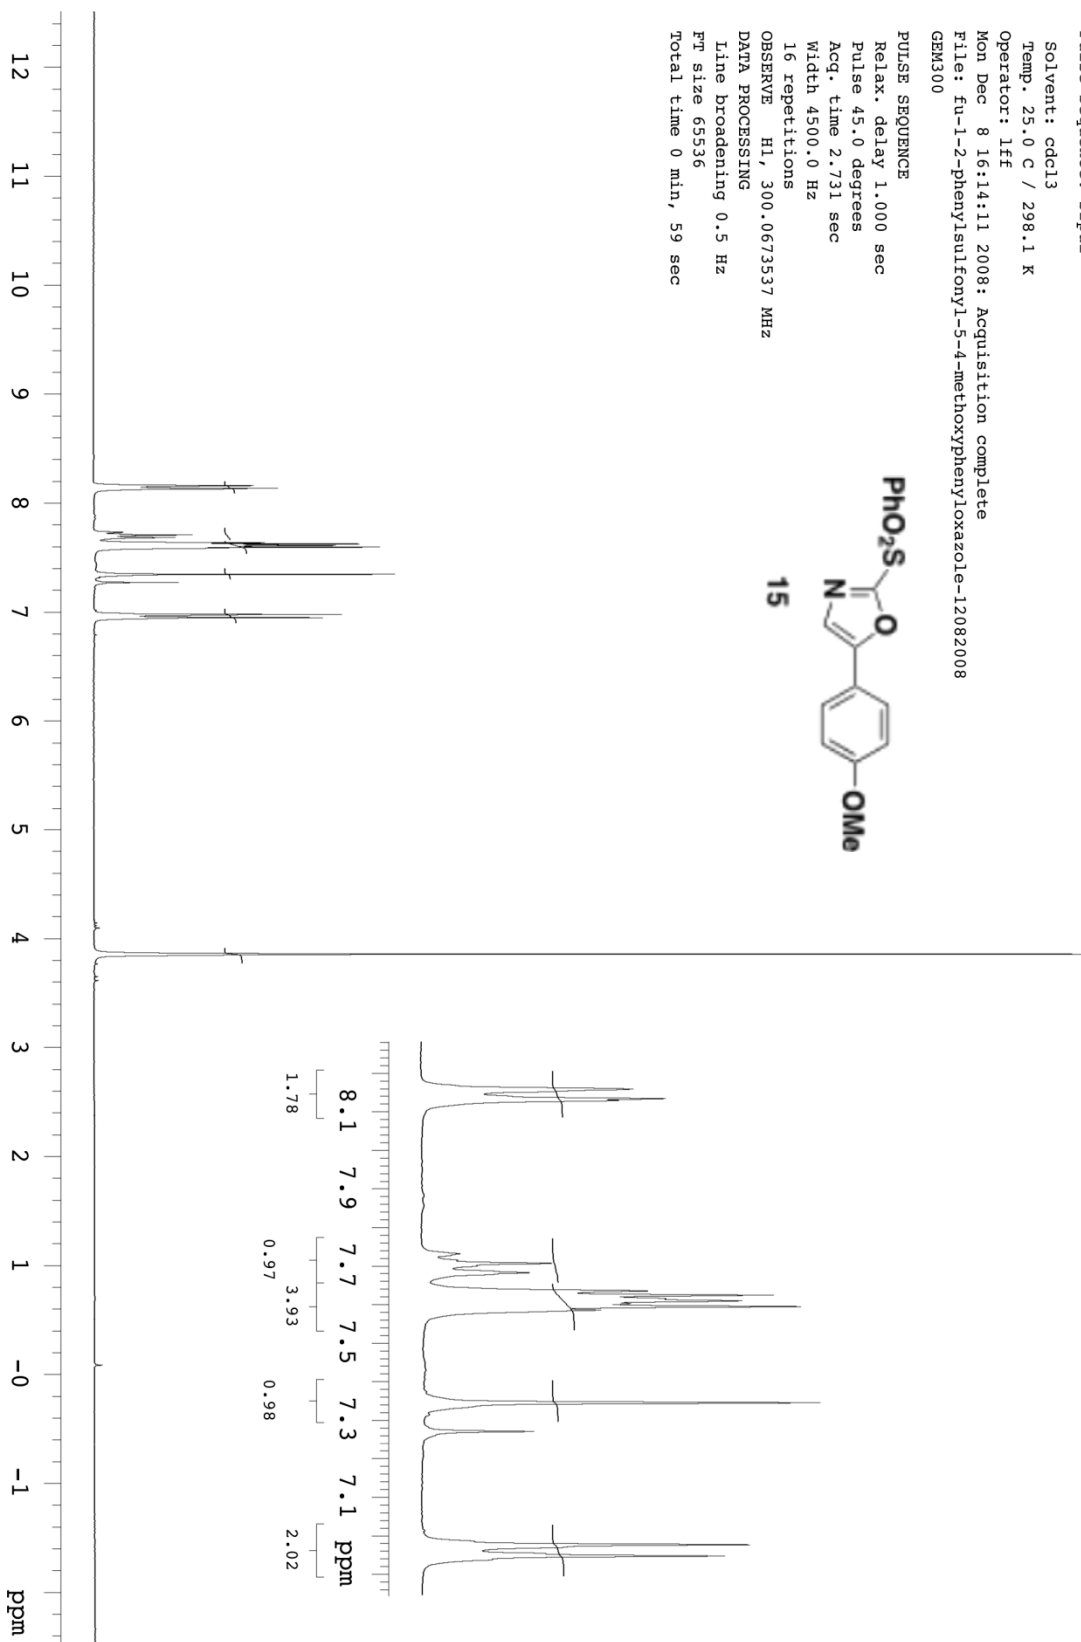

13C OBSERVE

Pulse Sequence: szpul

Solvent: cdcl3

Temp: 25.0 C / 298.1 K

Operator: LFF

Mon Dec 8 17:21:19 2008: Acquisition aborted

File: fu-2-2-phenylsulfonyl-5-(4-methoxyphenyl)oxazole-12082008

GEN300

PULSE SEQUENCE

Relax. delay 1.500 sec

Pulse 29.6 degrees

Acq. time 0.888 sec

Width 18864.9 Hz

1456 repetitions

OBSERVE C13, 75.4519635 MHz

DECOUPLE H1, 300.0688577 MHz

Power 38 dB

continuously on

NMR/2-16 modulated

DATA PROCESSING

Line broadening 2.0 Hz

F2 size 65536

Total time 6 hr, 36 min, 13 sec

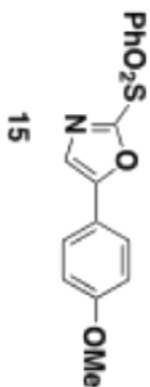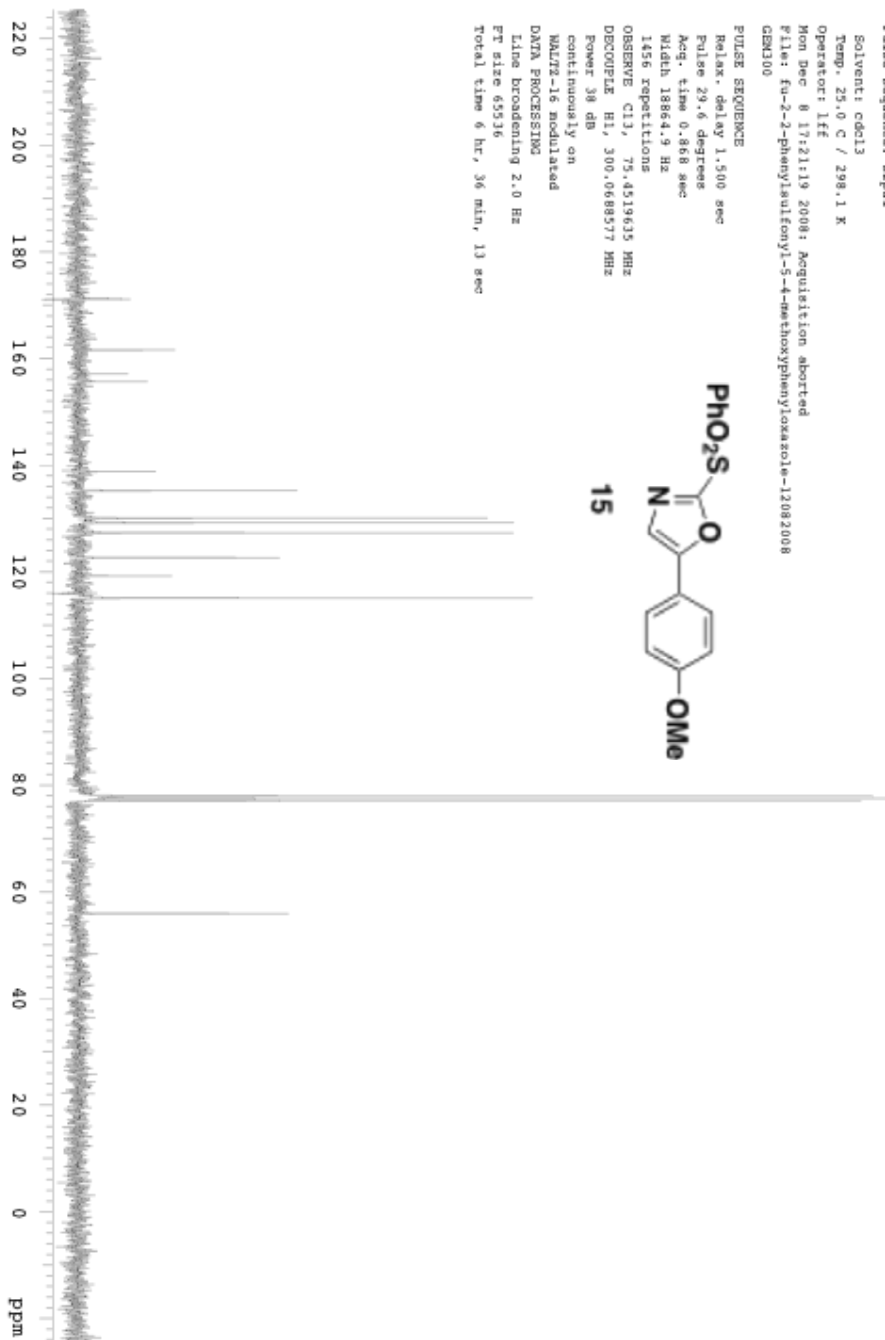



STANDARD 1H OBSERVE

Archive directory: /vwx400/vnmr1/vnmr2ps/data  
 Sample directory:  
 Pulse Sequence: s2pul  
 Solvent: cdcl3  
 Temp: 25.0 C / 298.1 K  
 Operator: LFF  
 Tue Feb 10 14:55:15 2009: Acquisition complete  
 File: FU-1-126-1  
 F509

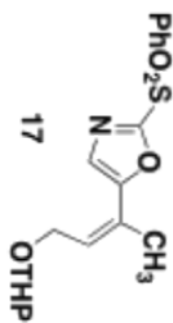

PULSE SEQUENCE  
 Relax. delay 1.000 sec  
 Pulse 45.0 degrees  
 Acq. time 2.730 sec  
 Width 6000.6 Hz  
 16 repetitions  
 OBSERVE H1, 400.1083627 MHz  
 DATA PROCESSING  
 Line broadening 0.3 Hz  
 F2 size 65536  
 Total time 0 min, 59 sec

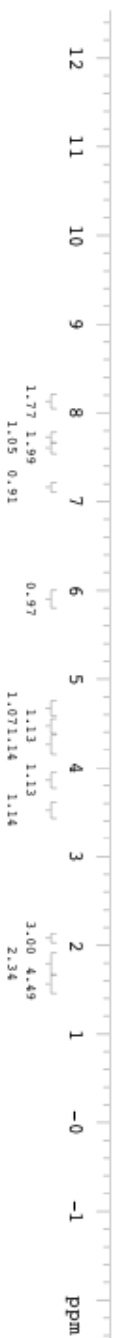

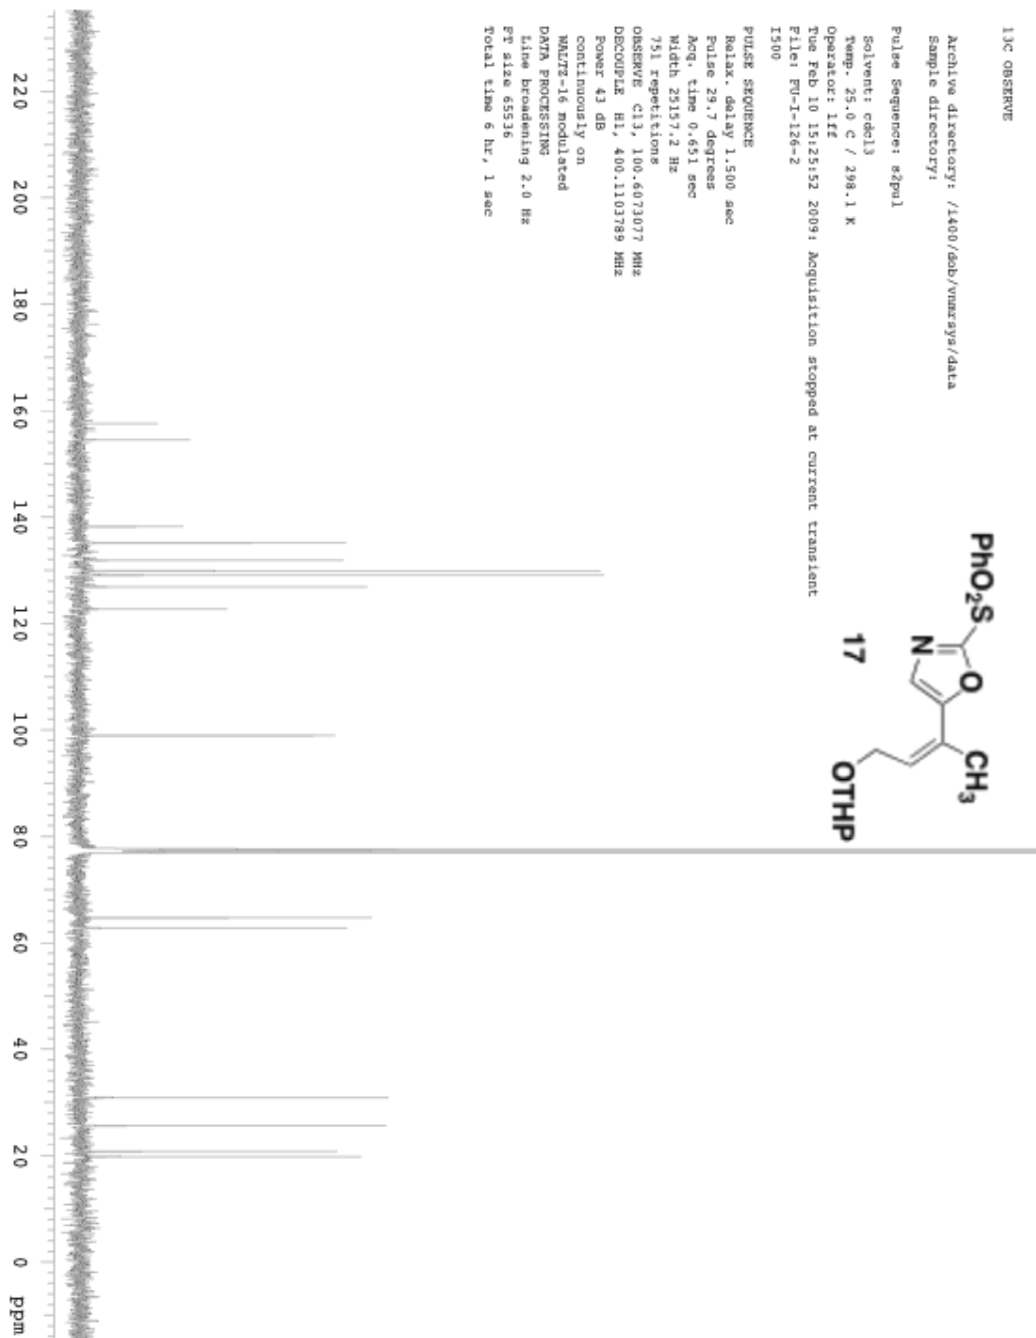

STANDARD 18 OBSERVE

Archive directory: /vxt400/vnmr1/vnmr2ps/data  
 Sample directory:

Pulse Sequence: zgpg30  
 Solvent: cdcl3  
 Temp: 25.0 C / 298.1 K  
 Operator: LFF  
 Sun Feb 15 17:17:38 2009: Acquisition complete  
 File: FU-1-142-1  
 F200

PULSE SEQUENCE  
 Relax. delay 1.000 sec  
 Pulse 45.0 degrees  
 Acq. time 2.730 sec  
 Width 6000.6 Hz  
 16 repetitions  
 OBSERVE H1, 400.108367 MHz  
 DATA PROCESSING  
 Line broadening 0.3 Hz  
 F1 size 65536  
 Total time 0 min, 59 sec

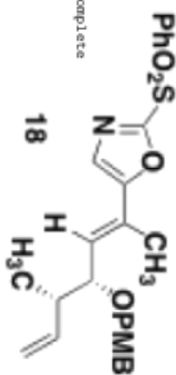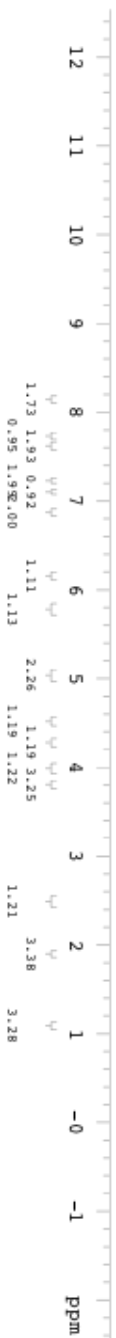

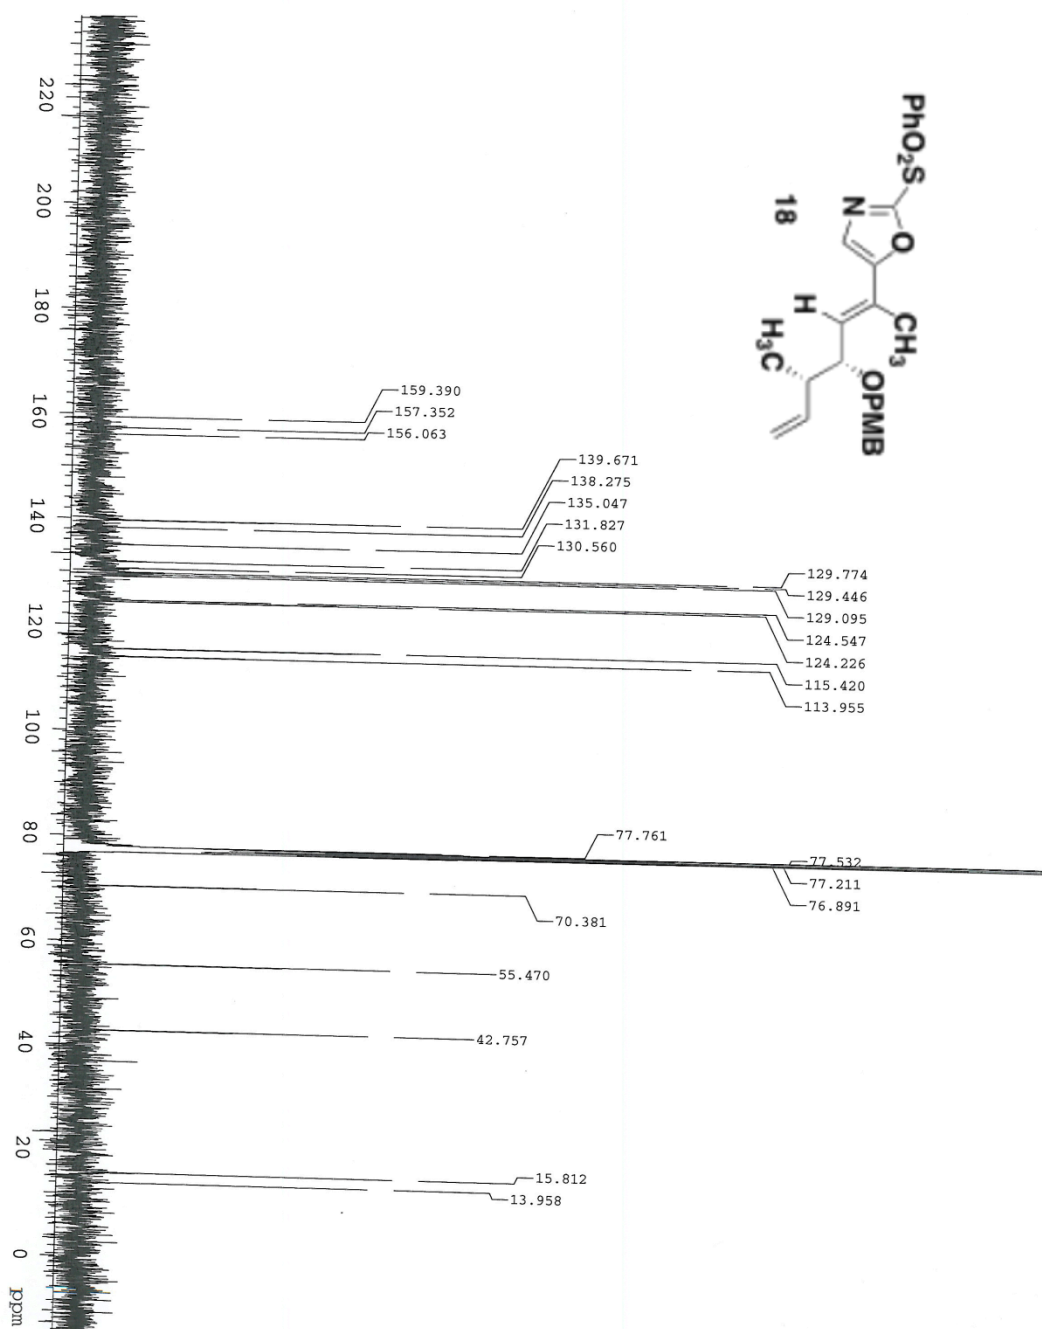

STANDARD 1H OBSERVE

Archive directory: /vxr400/vnmr1/vnmr-sys/data  
 Sample directory:

Pulse Sequence: s2pul  
 Solvent: cdcl3  
 Temp. 25.0 C / 298.1 K  
 Operator: lff  
 Thu Apr 23 18:10:48 2009: Experiment started  
 File: FU-I-159-1  
 1500

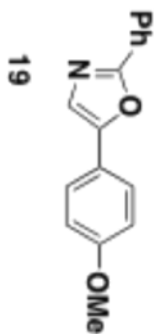

PULSE SEQUENCE  
 Relax. delay 1.000 sec  
 Pulse 45.0 degrees  
 Acq. time 2.730 sec  
 Width 6000.6 Hz  
 16 repetitions  
 OBSERVE H1, 400.1083001 MHz  
 DATA PROCESSING  
 Line broadening 0.3 Hz  
 FM size 65536  
 Total time 0 min, 59 sec

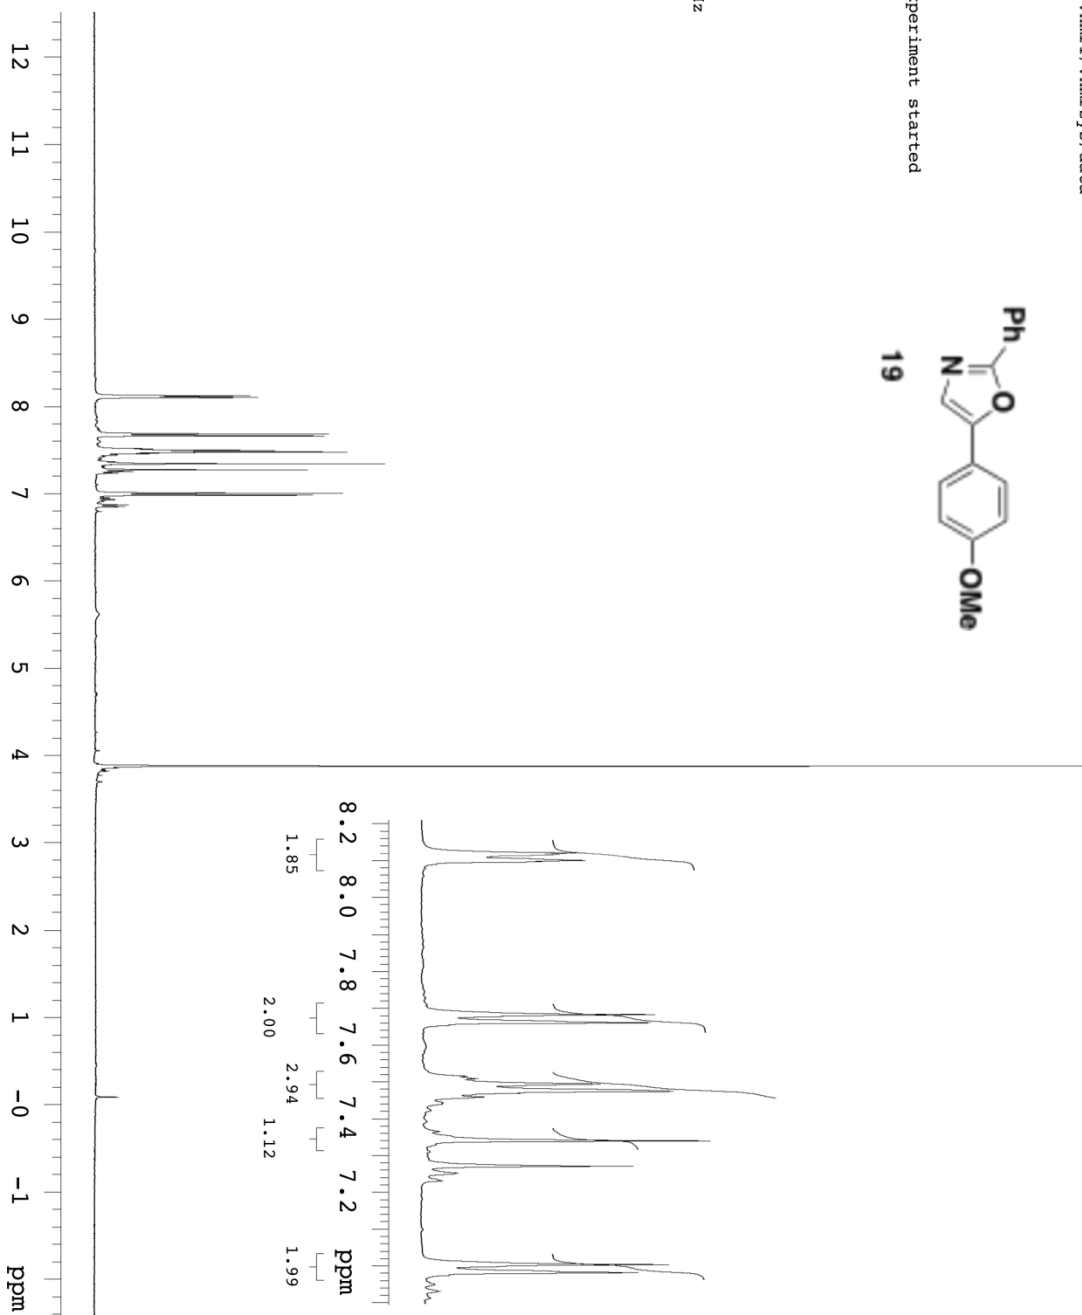

13C OBSERVE

Archive directory: /1400/dab/vmsays/data

Sample directory:

Pulse Sequence: s2pul

Solvent: cdcl3

Temp: 25.0 C / 298.1 K

Operator: lff

Thu Apr 23 18:11:54 2009: Experiment started

File: FU-1-159-2

1509

PULSE SEQUENCE

Polariz. delay 1.500 sec

Pulse 29.7 degrees

Acq. time 0.651 sec

Width 25157.2 Hz

10000 repetitions

OBSERVE c13, 100.627896 MHz

DECOUPLE H1, 400.1103072 MHz

Power 43 dB

continuously on

MULTE-16 modulated

DATA PROCESSING

Line broadening 2.0 Hz

Fw size 65536

Total time 6 hr, 1 sec

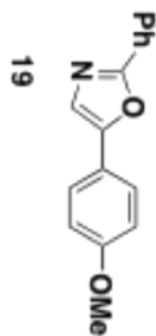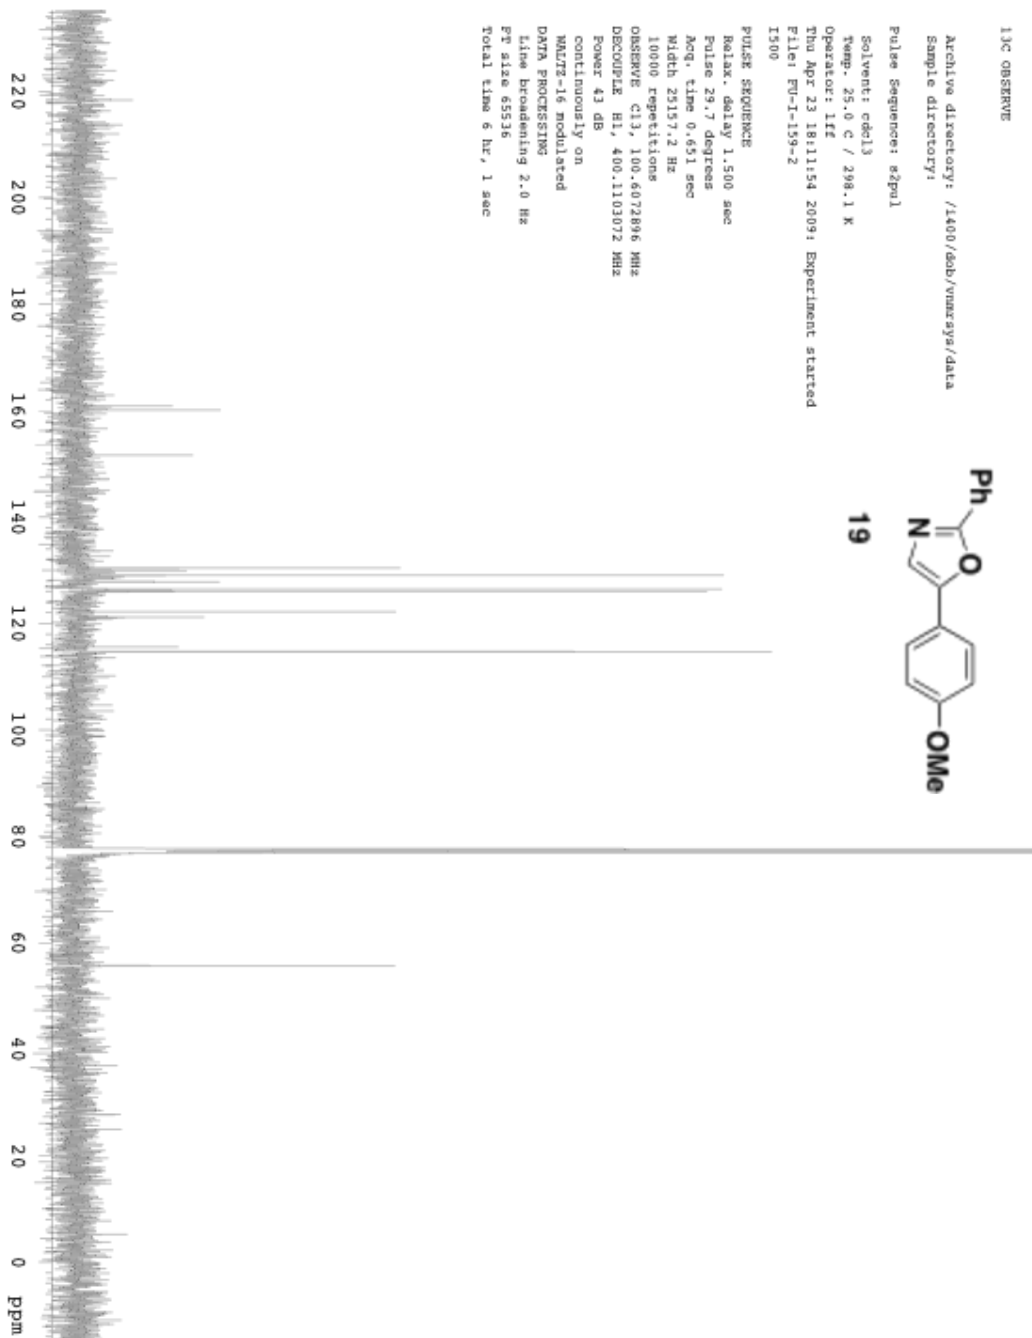

STANDARD 1H OBSERVE

Archive directory: /vxi400/vnmr1/vnmr.sys/data  
 Sample directory:

Pulse Sequence: sZpu1

Solvent: cdcl3

Temp. 25.0 C / 298.1 K

Operator: lff

Sat Apr 25 12:03:50 2009: Acquisition complete

File: fu-I-155-11

F500

PULSE SEQUENCE

Relax. delay 1.000 sec

Pulse 45.0 degrees

Acq. time 2.730 sec

Width 6000.6 Hz

16 repetitions

OBSERVE H1, 400.1083003 MHz

DATA PROCESSING

Line broadening 0.3 Hz

FT size 65536

Total time 0 min, 59 sec

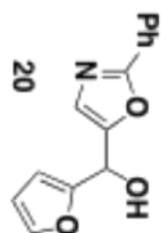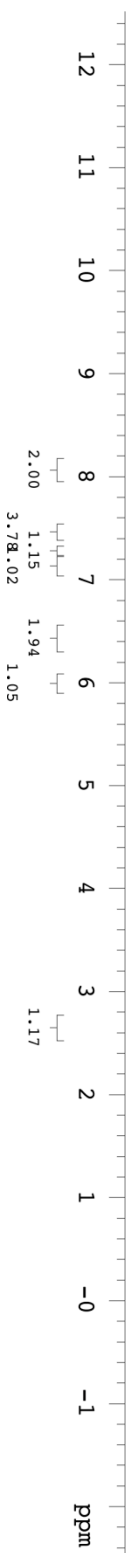

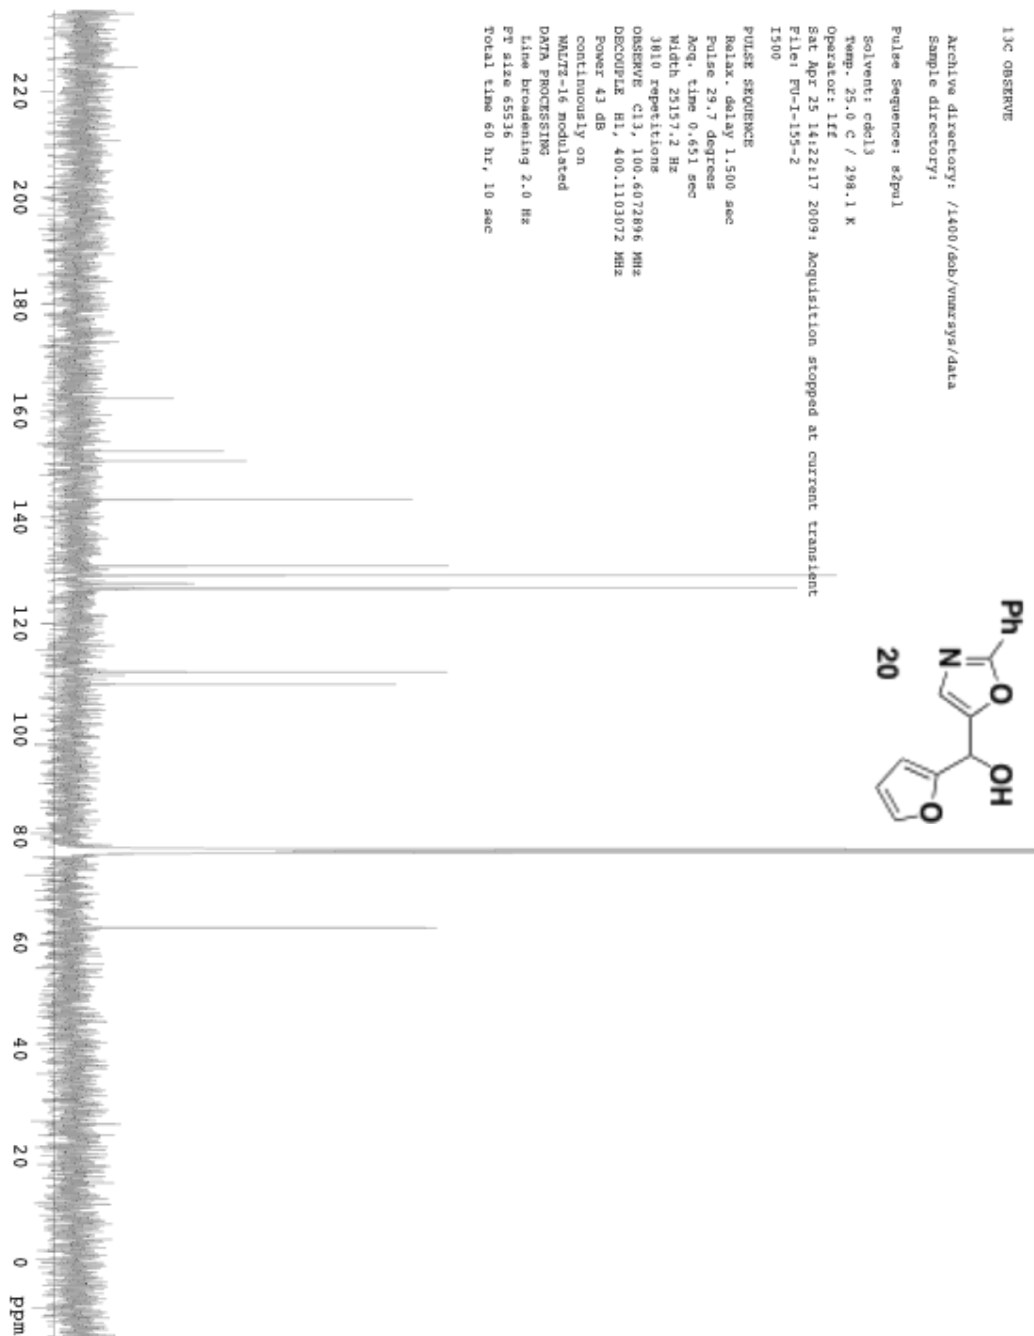



\*\*\*\*\* IN VESSELS

Archive directory: /vrr400/vnmr1/vnmrSYS/data  
Sample directory:

Pulse Sequence: szpul

Solvent: cdcl3

Temp: 25.0 C / 298.1 K

Operator: lff

Thu Apr 23 23:03:19 2009: Experiment started

File: FU-I-195-1  
1500

PULSE SEQUENCE

Relax. delay 1.000 sec

Pulse 45.0 degrees

Acq. time 2.730 sec

Width 6000.6 Hz

16 repetitions

OBSERVE H1, 400.1083003 MHz

DATA PROCESSING

Line broadening 0.3 Hz

FT size 65536

Total time 0 min, 59 sec

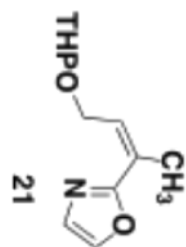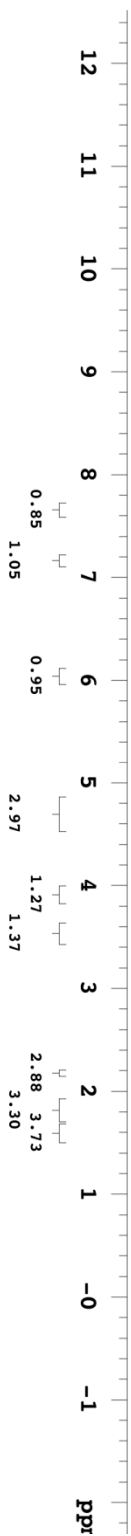

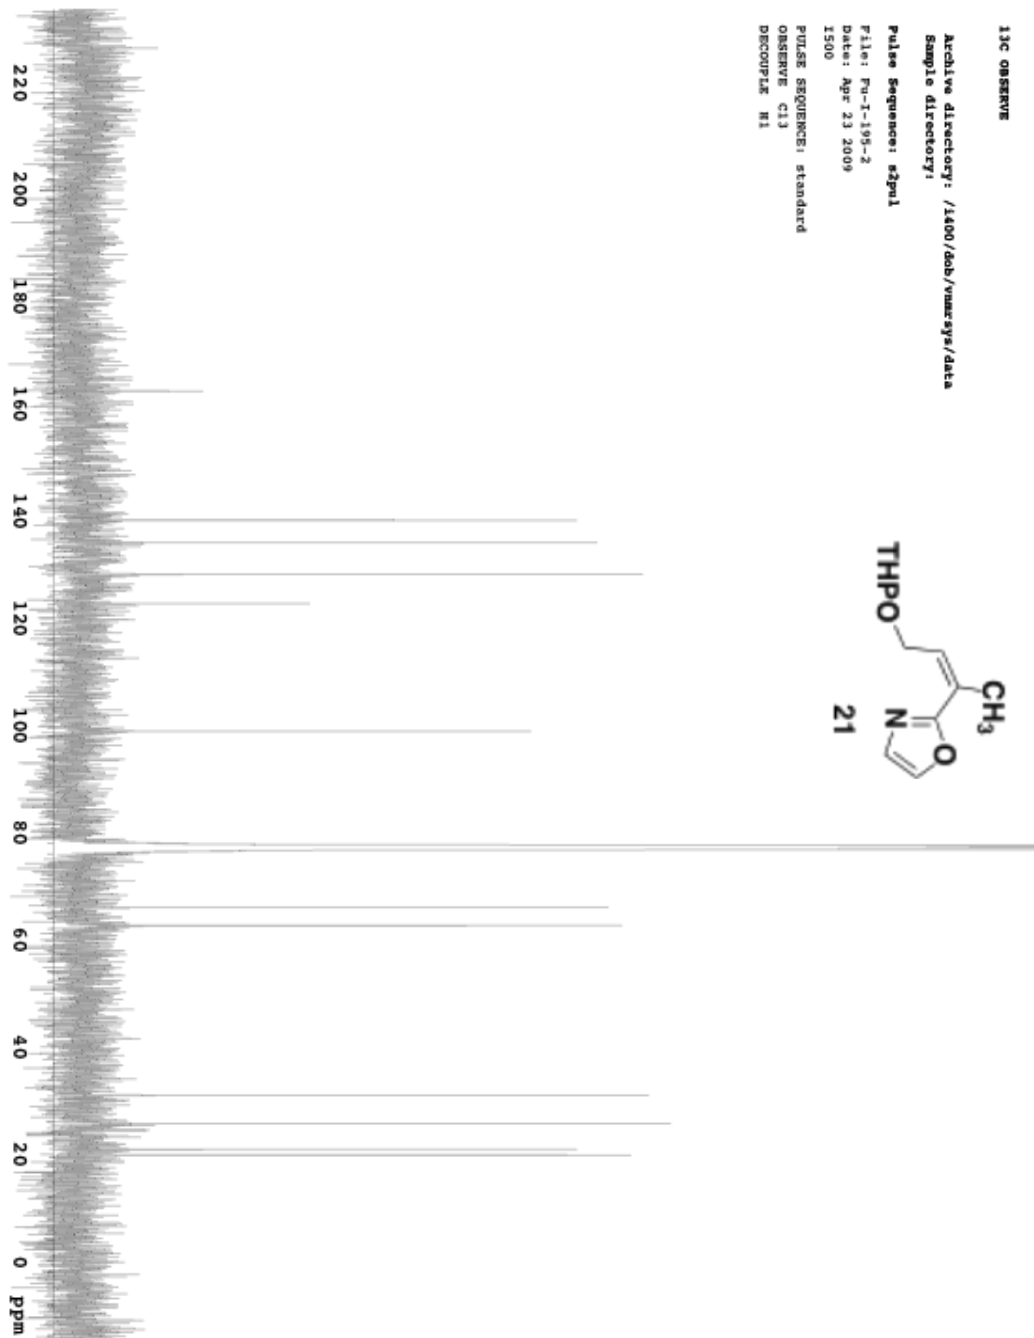

## STANDARD PROTON PARAMETERS

Archive directory:  
Sample directory:

Pulse Sequence: s2pul

File: Fu-1-289-1

Date: Nov 1 2009  
1500PULSE SEQUENCE: standard  
OBSERVE H1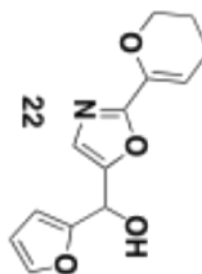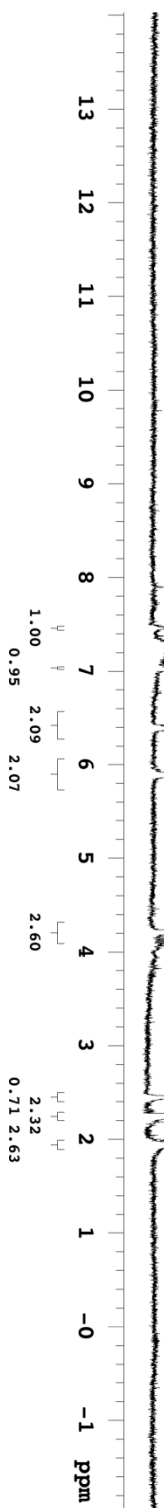

## STANDARD CARBON PARAMETERS

Archive directory:  
Sample directory:

Pulse Sequence: s2pul

User: 1-14-87

File: Fu-1-289-22

Date: Nov 1 2009

1500

PULSE SEQUENCE: standard  
OBSERVE C13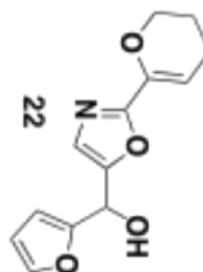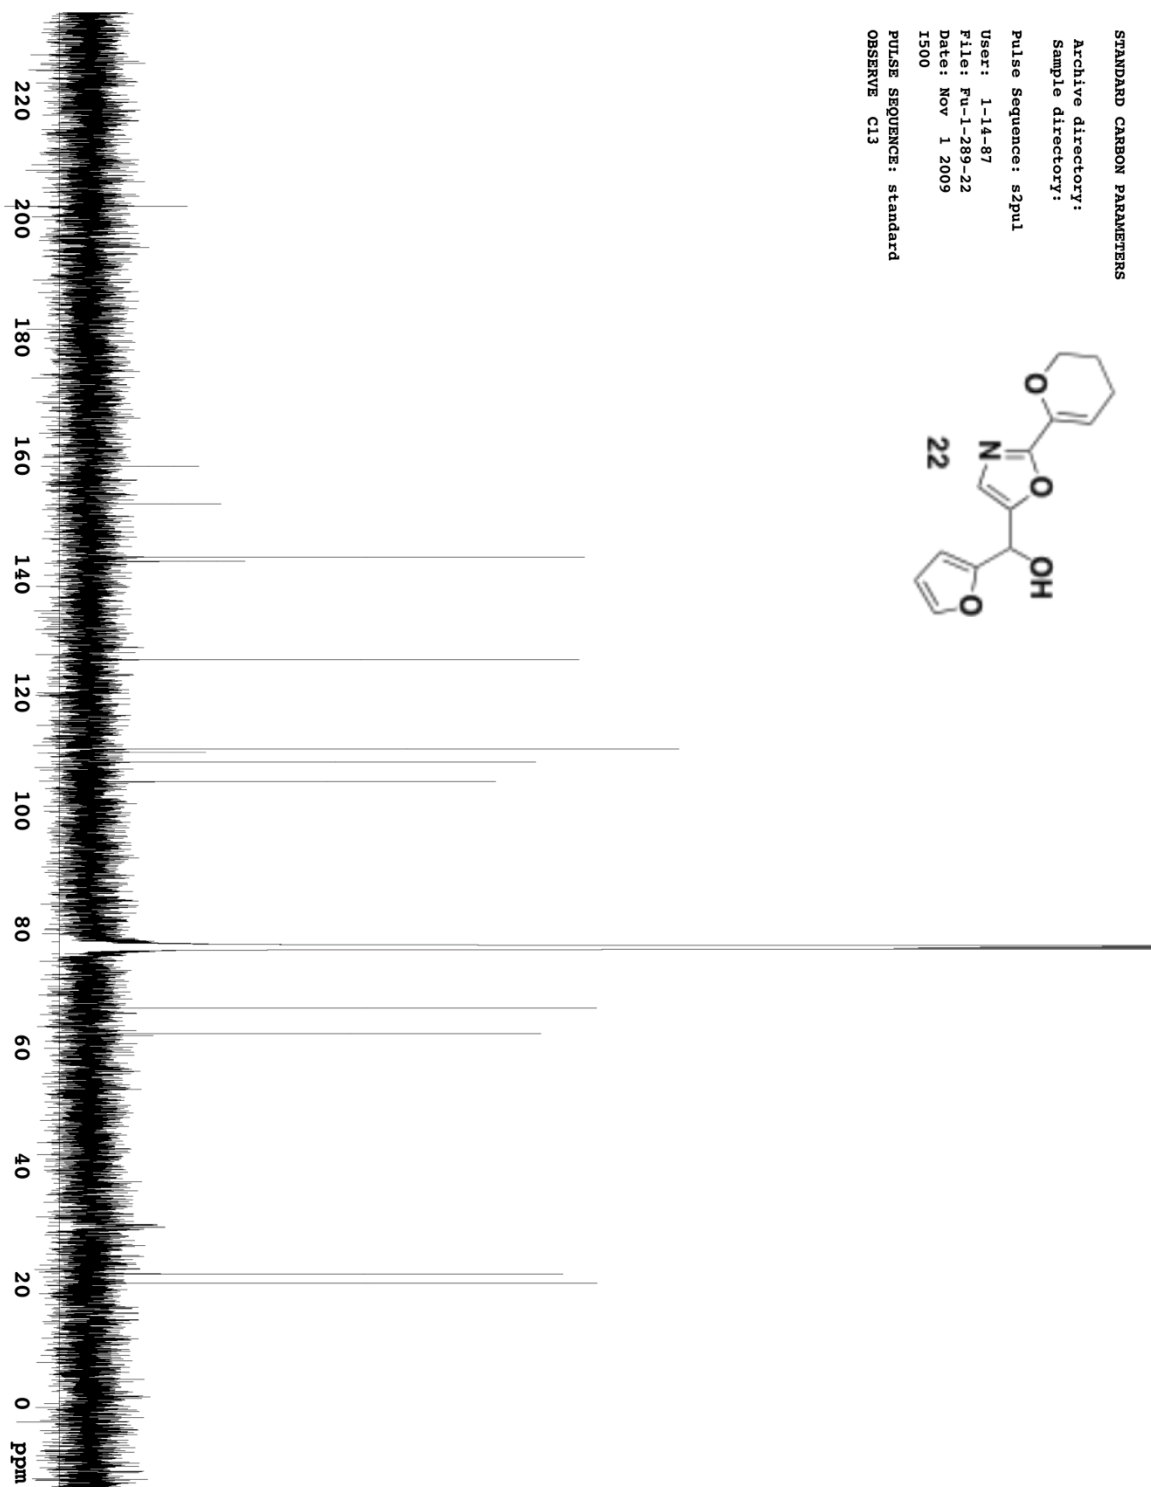

STANDARD PROTON PARAMETERS

Archive directory:  
 Sample directory:  
 Pulse Sequence: szpul  
 File: Fu-1-279-11  
 Date: Oct 19 2009  
 1500  
 PULSE SEQUENCE: standard  
 OBSERVE H1

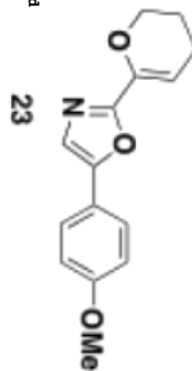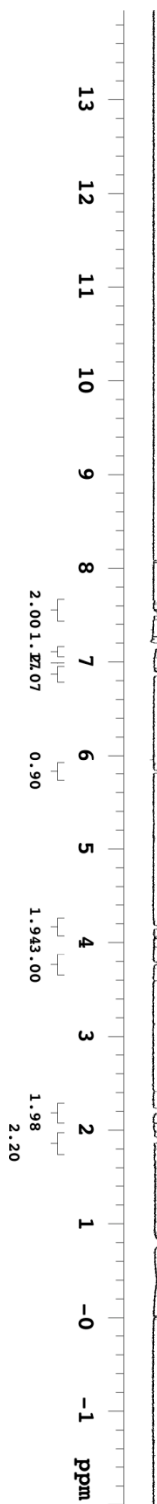

## STANDARD CARBON PARAMETERS

Archive directory:  
Sample directory:

Pulse Sequence: szpul

User: 1-14-87

File: Pu-1-279-22

Date: Oct 18 2009

1500

PULSE SEQUENCE: standard  
OBSERVE C13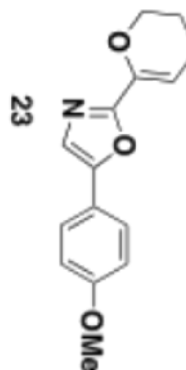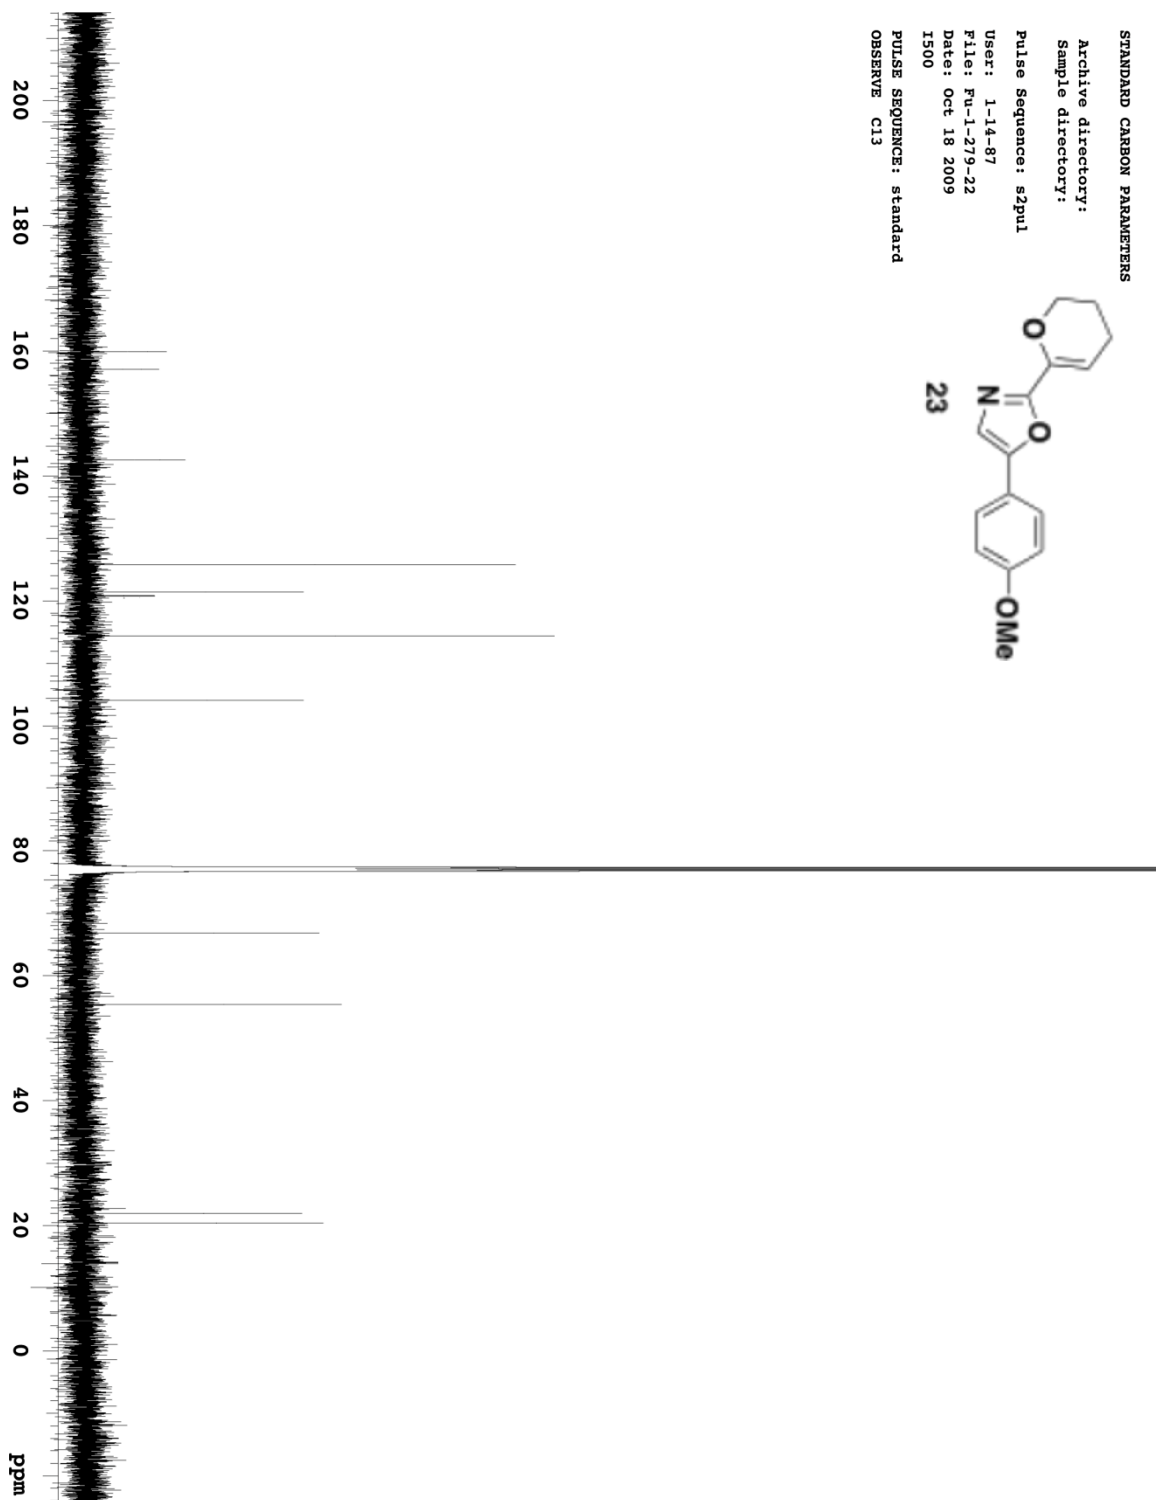

## STANDARD PROTON PARAMETERS

Archive directory:

Sample directory:

Pulse Sequence: szpul

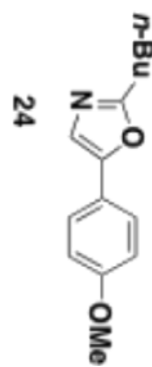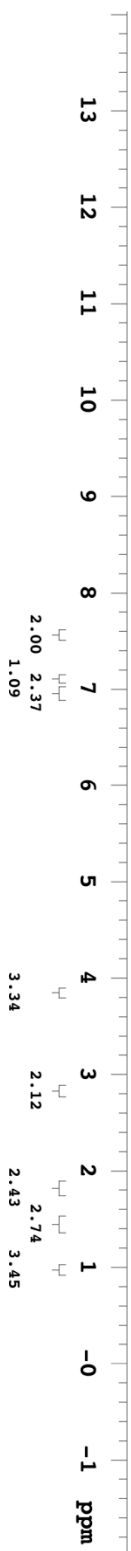

## STANDARD CARBON PARAMETERS

Archive directory:  
Sample directory:

Pulse Sequence: s2pul

User: 1-14-87

File: Pu-1-190-2

Date: Oct 10 2009

1500

PULSE SEQUENCE: standard  
OBSERVE C13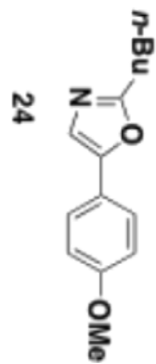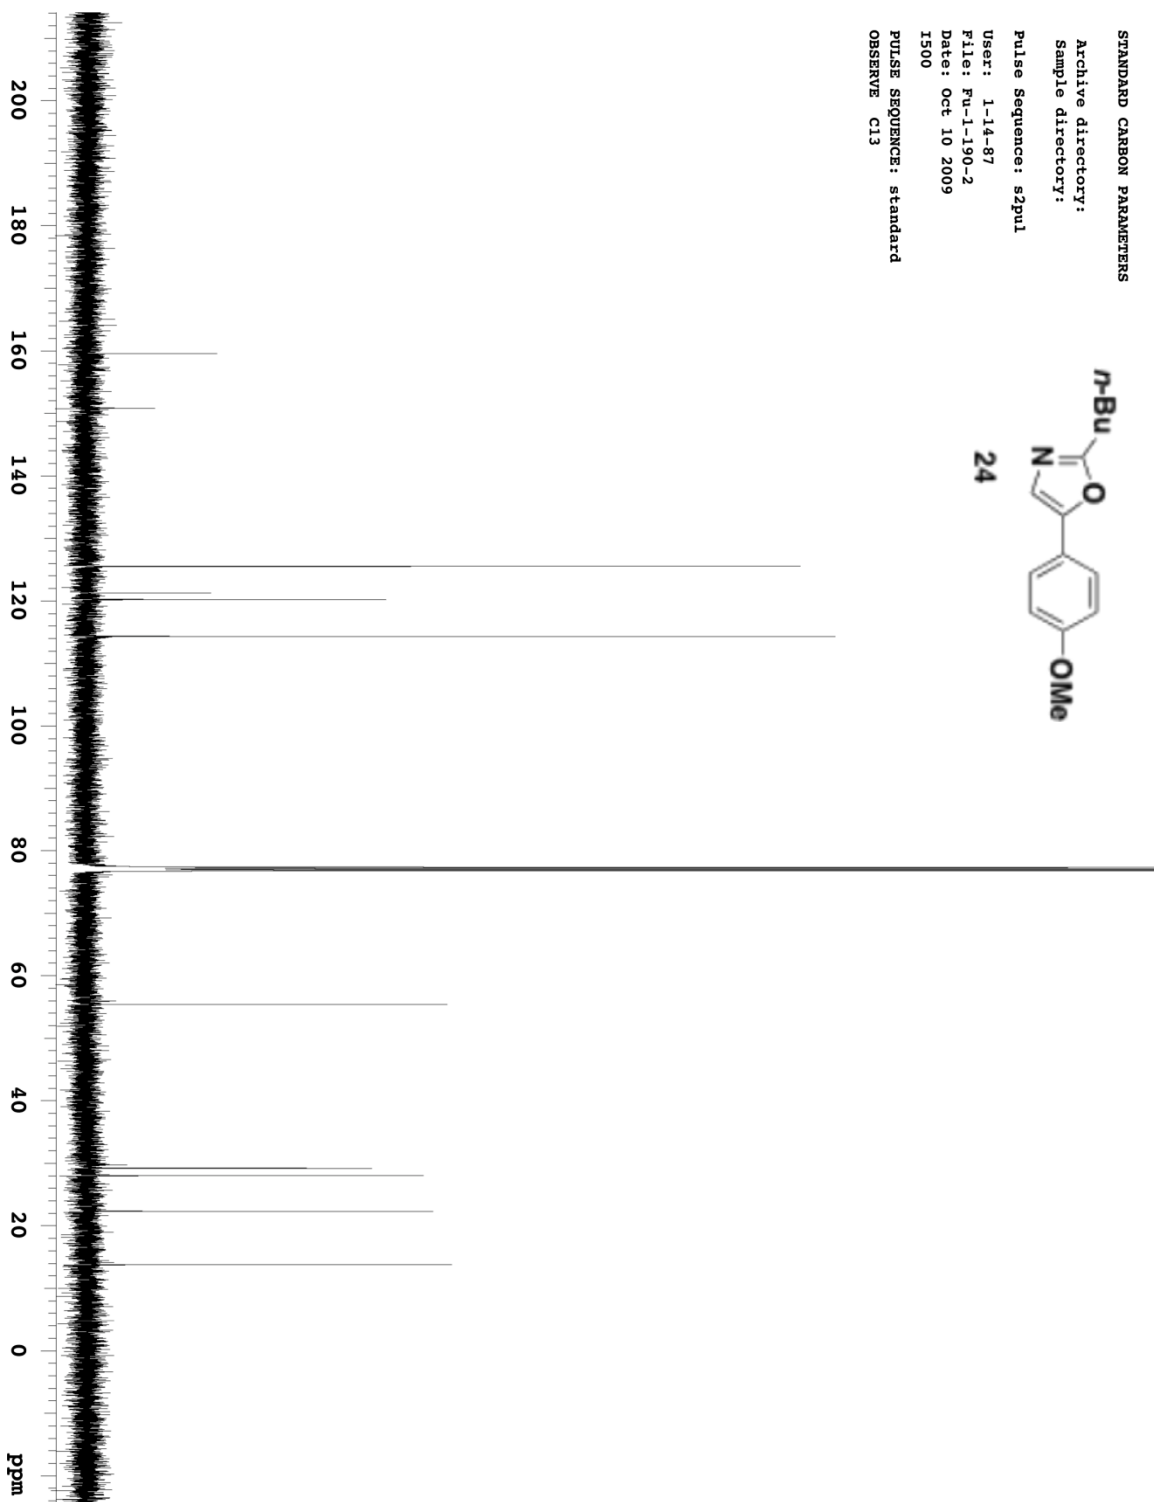



## STANDARD PROTON PARAMETERS

Archive directory:  
Sample directory:

Pulse sequence: szpul

File: Fu-1-196-1

Date: Oct 8 2009  
1500PULSE SEQUENCE: standard  
OBSERVE H1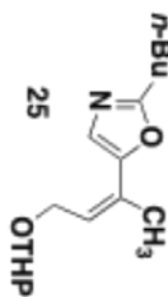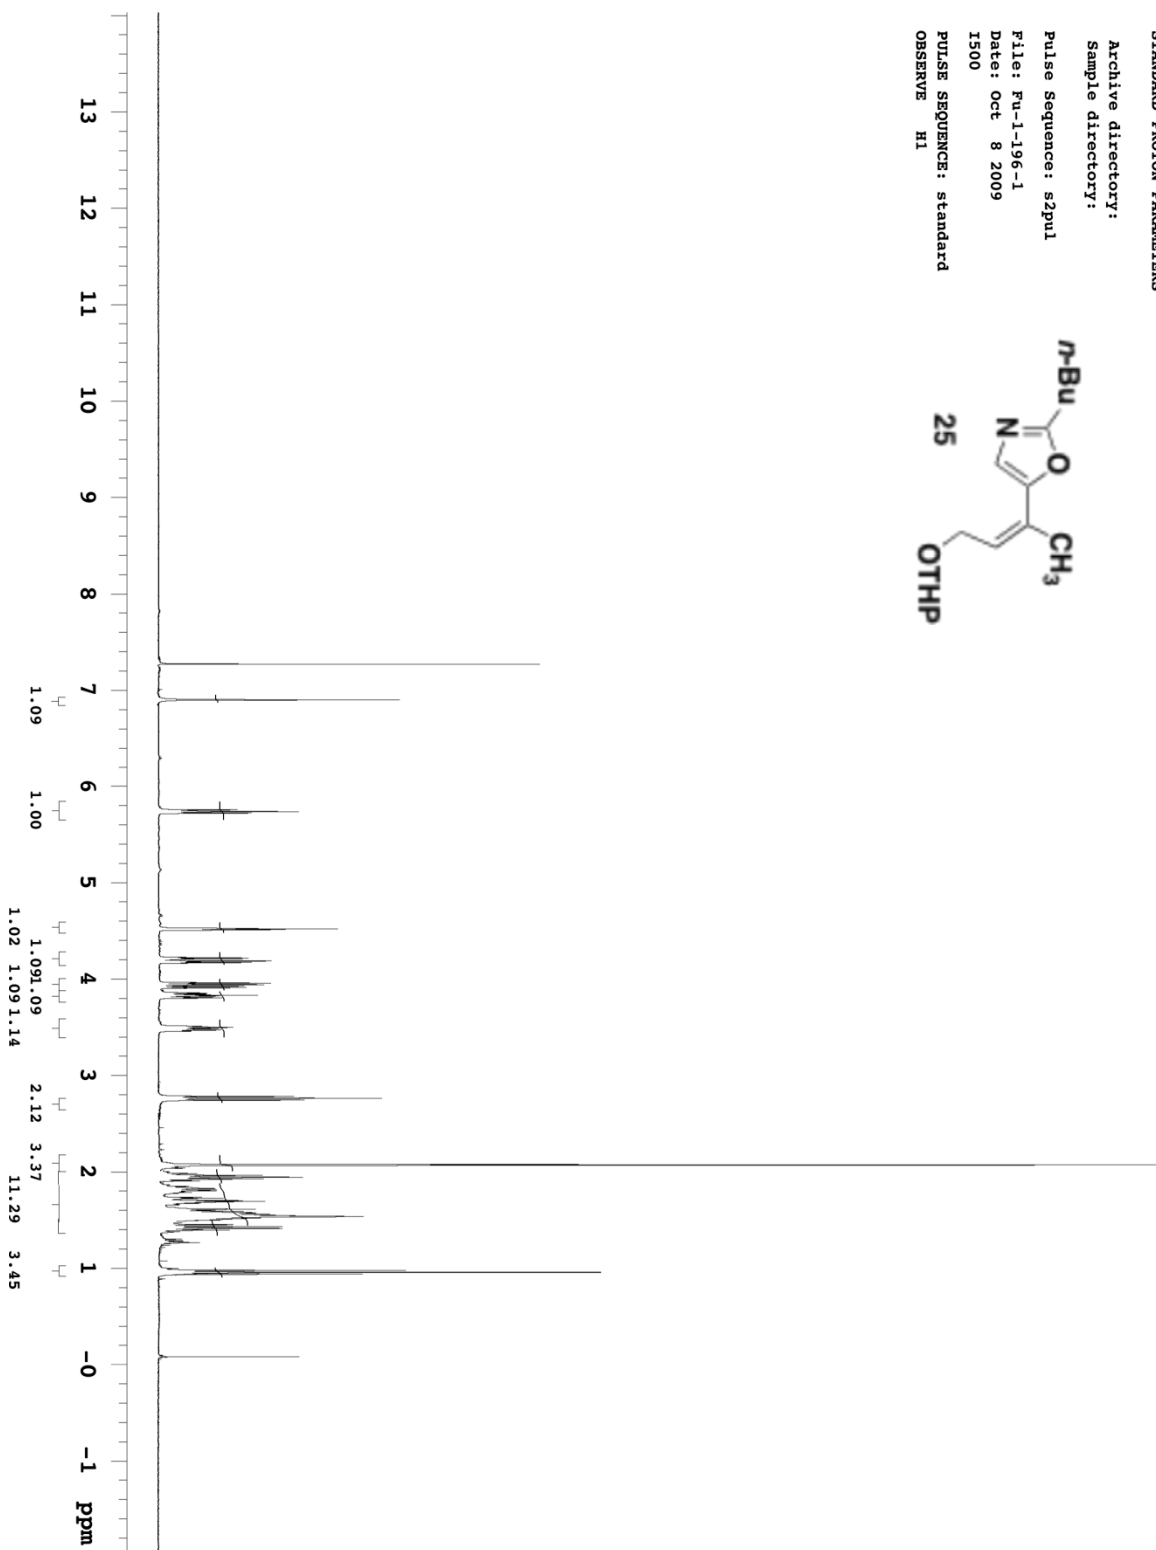

STANDARD CARBON PARAMETERS

Archive directory:  
Sample directory:

Pulse Sequence: s2pul

User: 1-14-87

File: Fu-1-196-2

Date: Oct 8 2009

1500

PULSE SEQUENCE: standard

OBSERVE C13

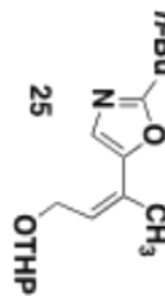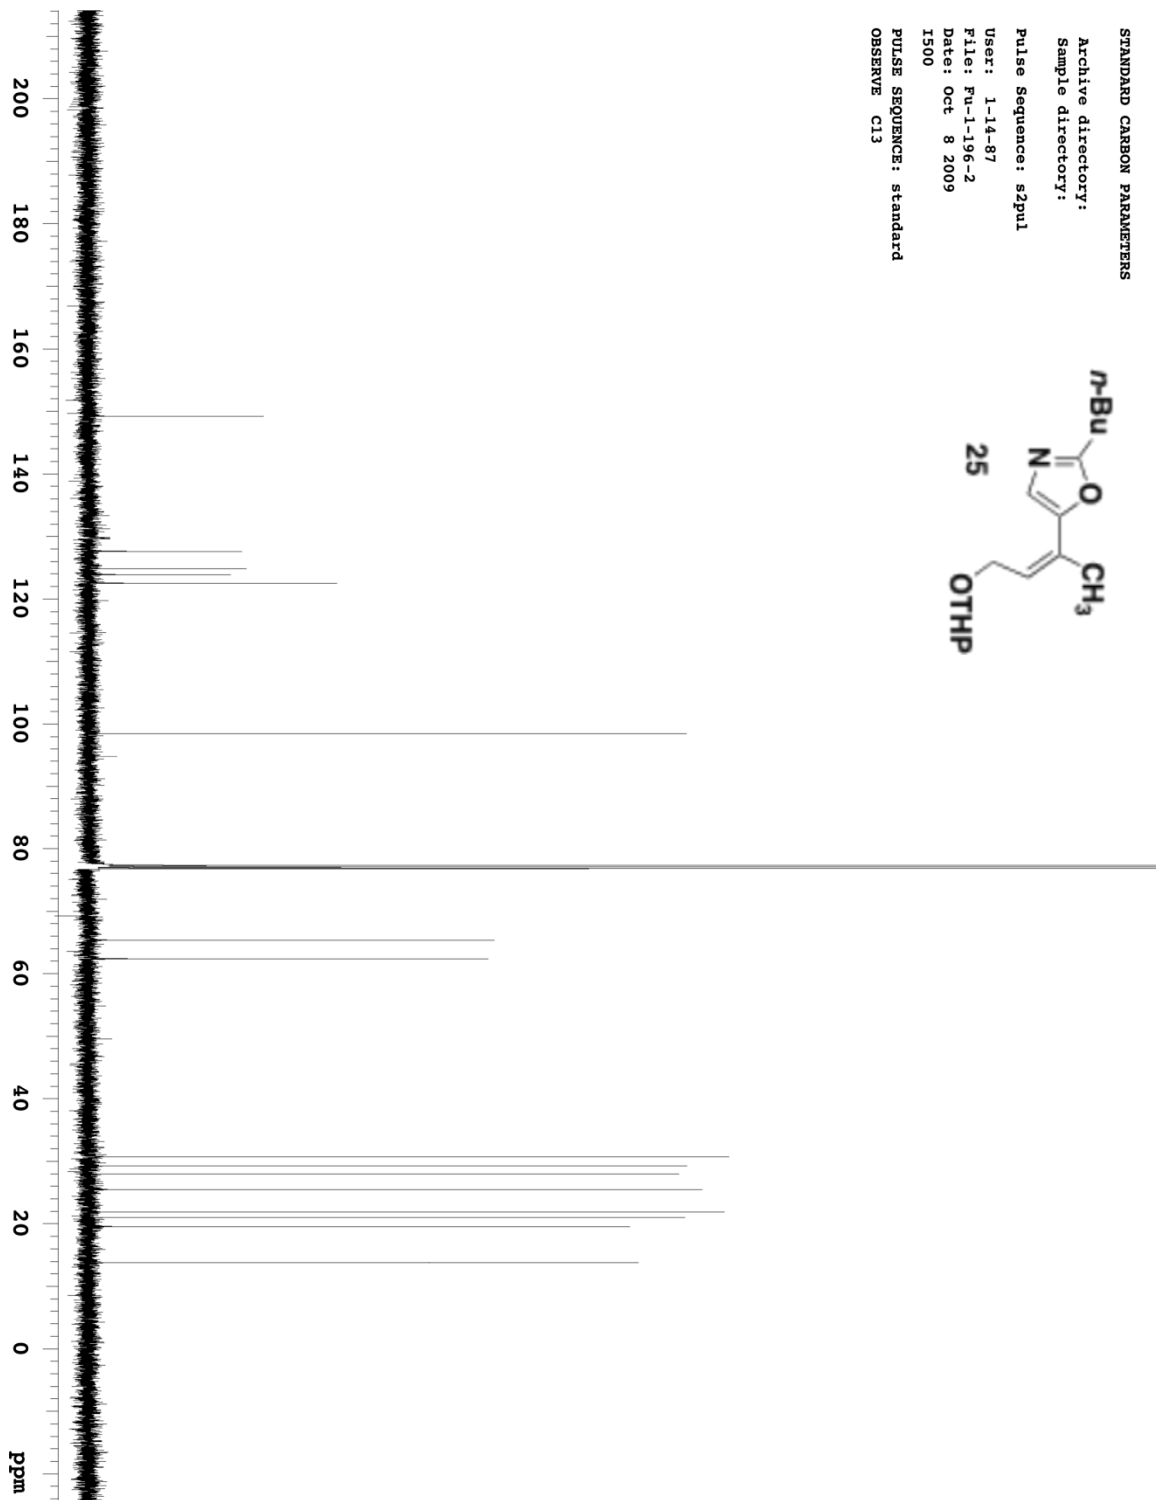

STANDARD 1H OBSERVE

Archive directory: /vxx400/vnmr1/vnmrsgs/data  
 Sample directory:

Pulse Sequence: s2pul1

Solvent: cdcl3

Temp. 25.0 C / 298.1 K

Operator: lff

Wed Apr 29 20:05:46 2009: Acquisition complete

File: FU-1-197-1

1500

PULSE SEQUENCE

Relax. delay 1.000 sec

Pulse 45.0 degrees

Acq. time 2.730 sec

Width 6000.6 Hz

16 repetitions

OBSERVE H1, 400.1083005 MHz

DATA PROCESSING

Line broadening 0.3 Hz

F2 size 65536

Total time 0 min, 59 sec

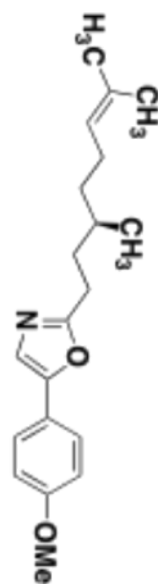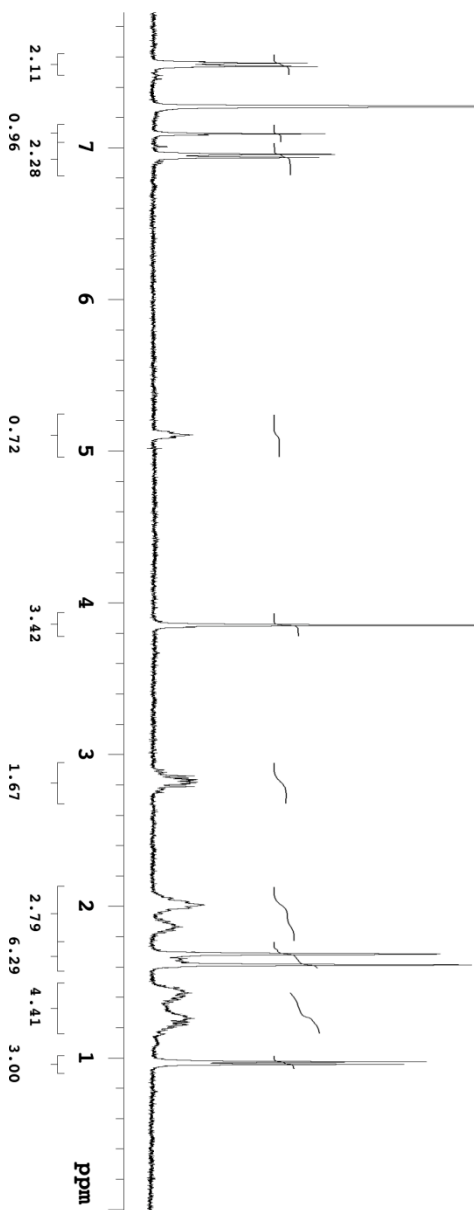

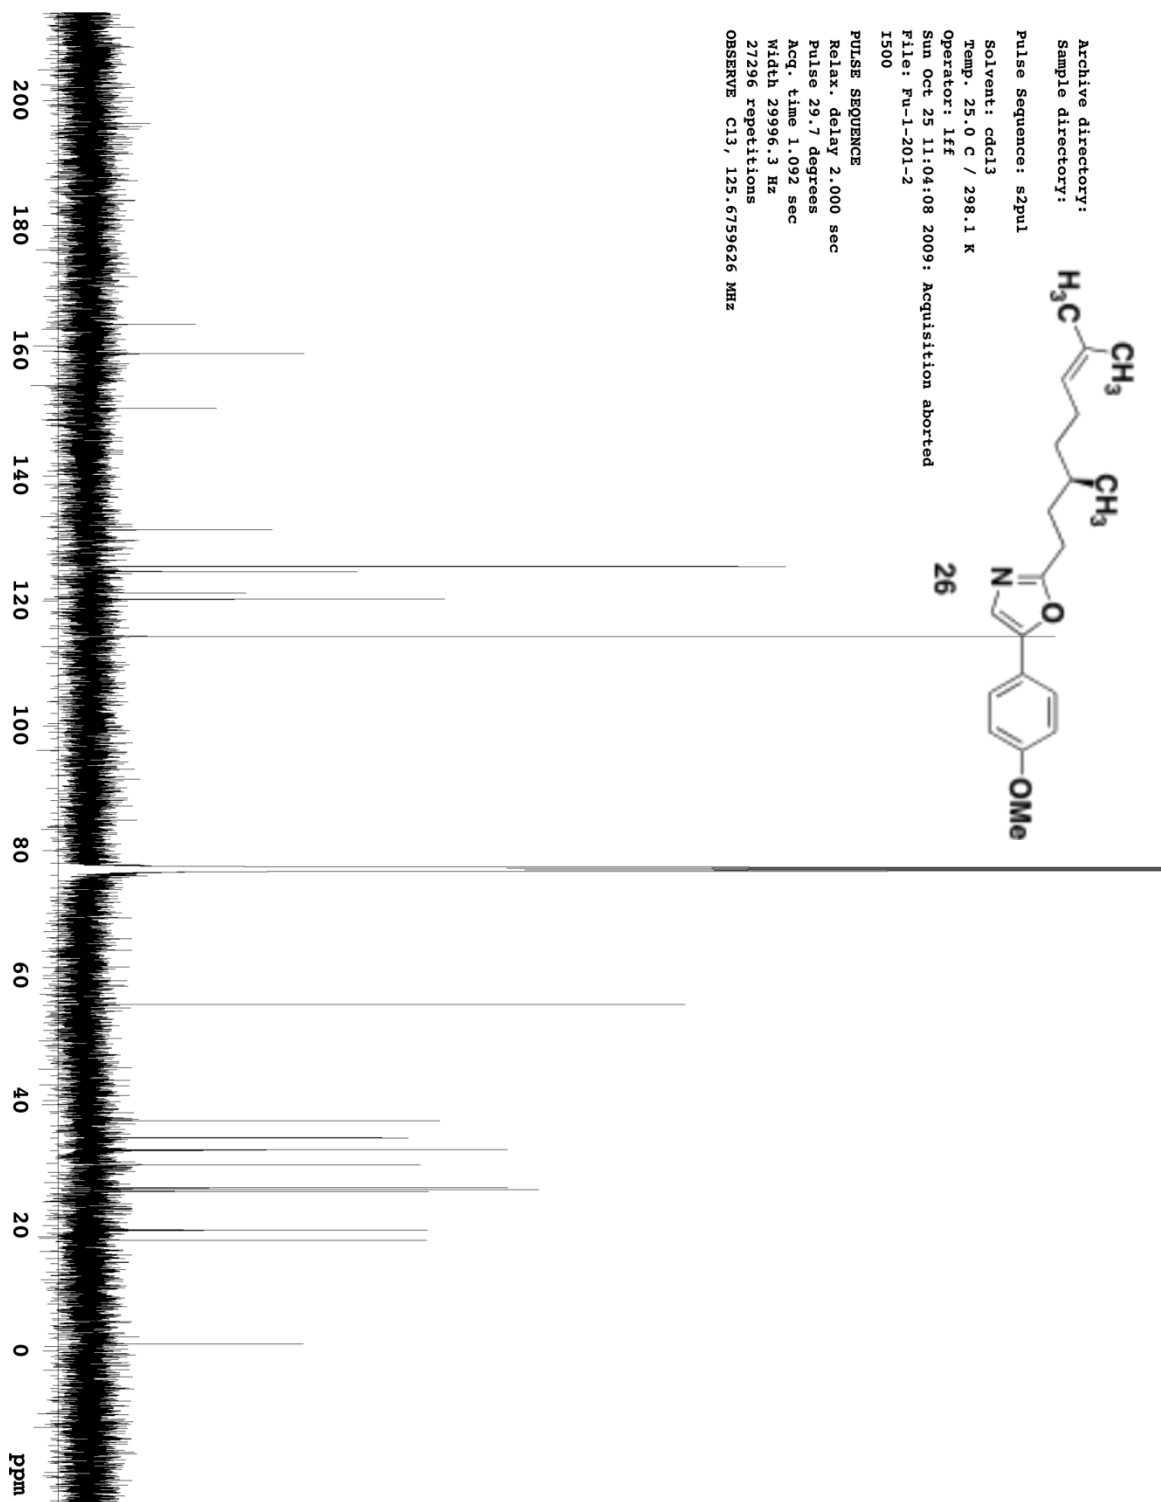

STANDARD PROTON PARAMETERS

Archive directory:  
Sample directory:  
Pulse Sequence: szpul  
File: Fu-1-202-1  
Date: Nov 3 2009  
1500  
PULSE SEQUENCE: standard  
OBSERVE H1

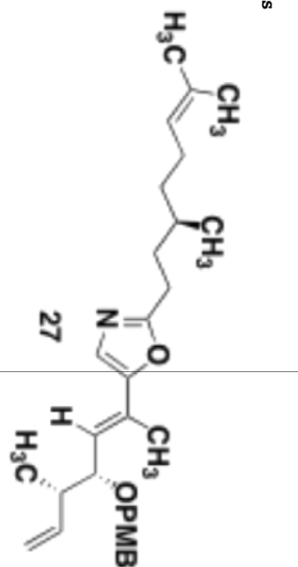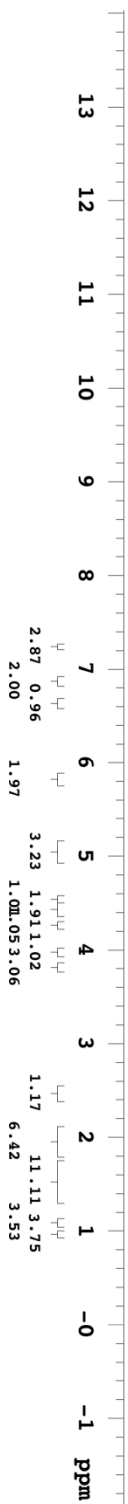

## STANDARD CARBON PARAMETERS

Archive directory:  
Sample directory:

Pulse Sequence: szpul

User: 1-14-87

File: Fu-1-202-22

Date: Nov 3 2009

1500

PULSE SEQUENCE: standard  
OBSERVE C13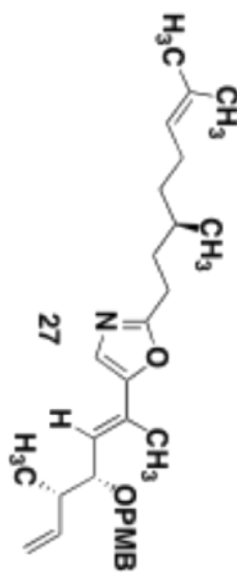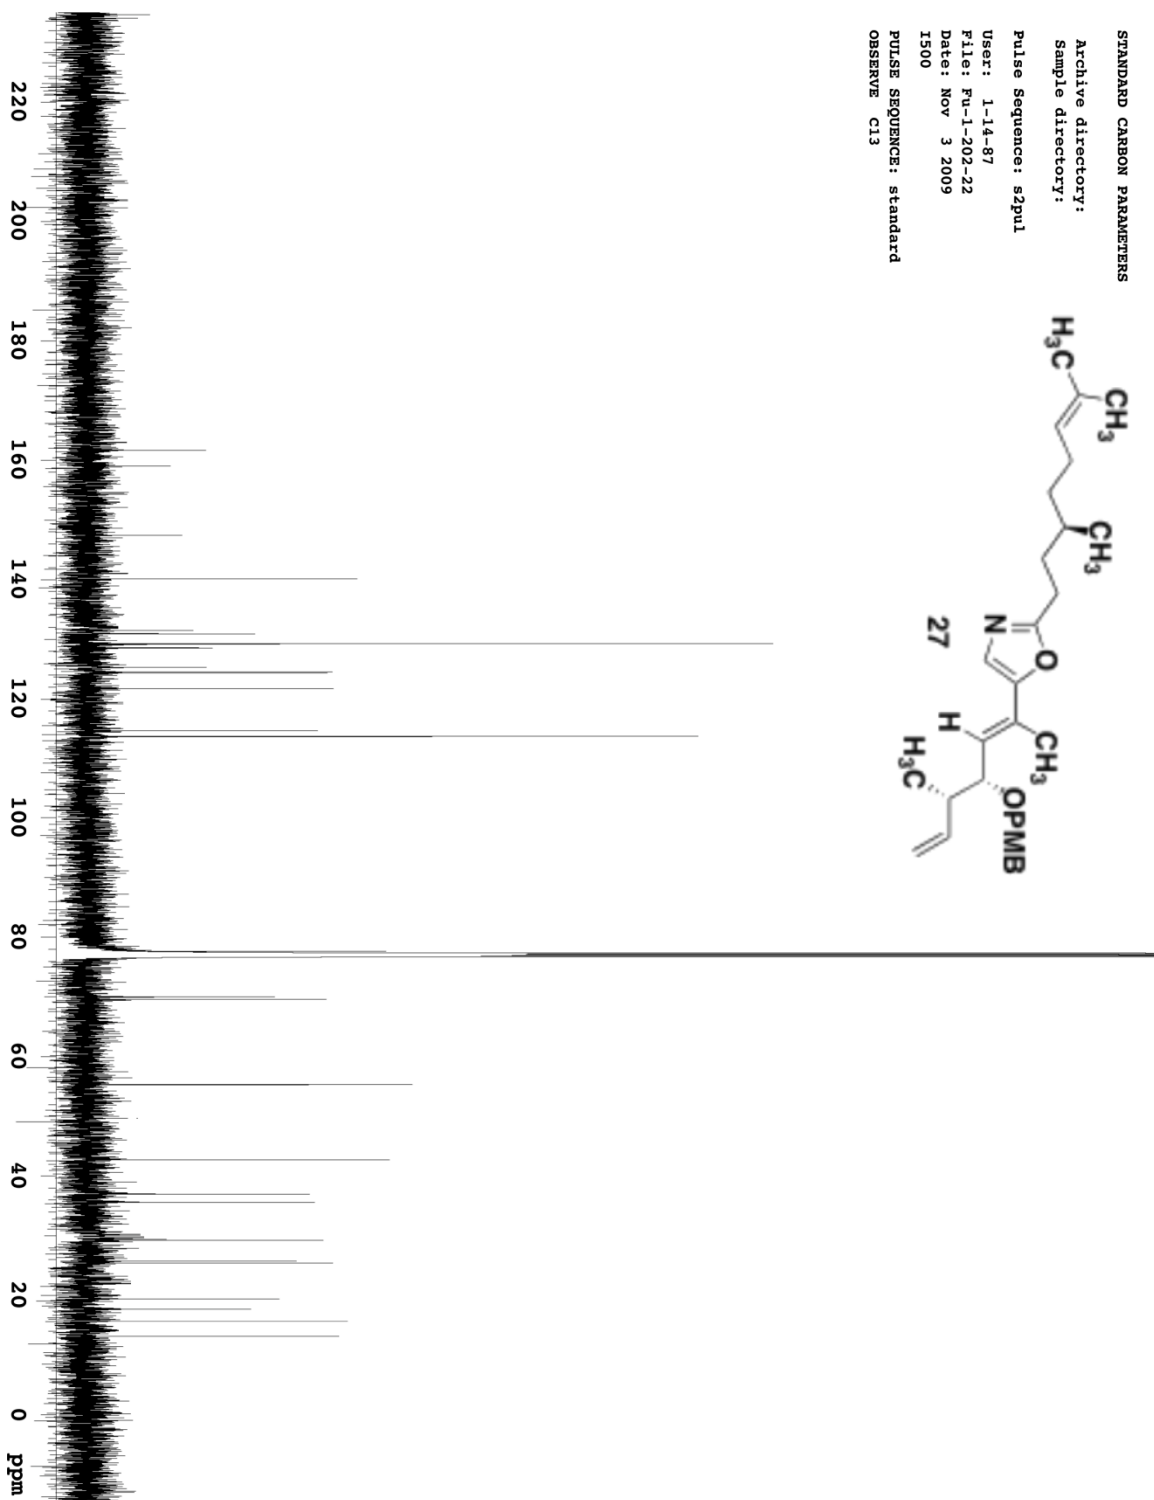

## STANDARD PROTON PARAMETERS

Archive directory:

Sample directory:

Pulse Sequence: s2pul

File: Fu-2-21-11

Date: Dec 2 2009

1500

PULSE SEQUENCE: standard

OBSERVE H1

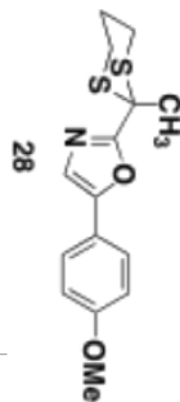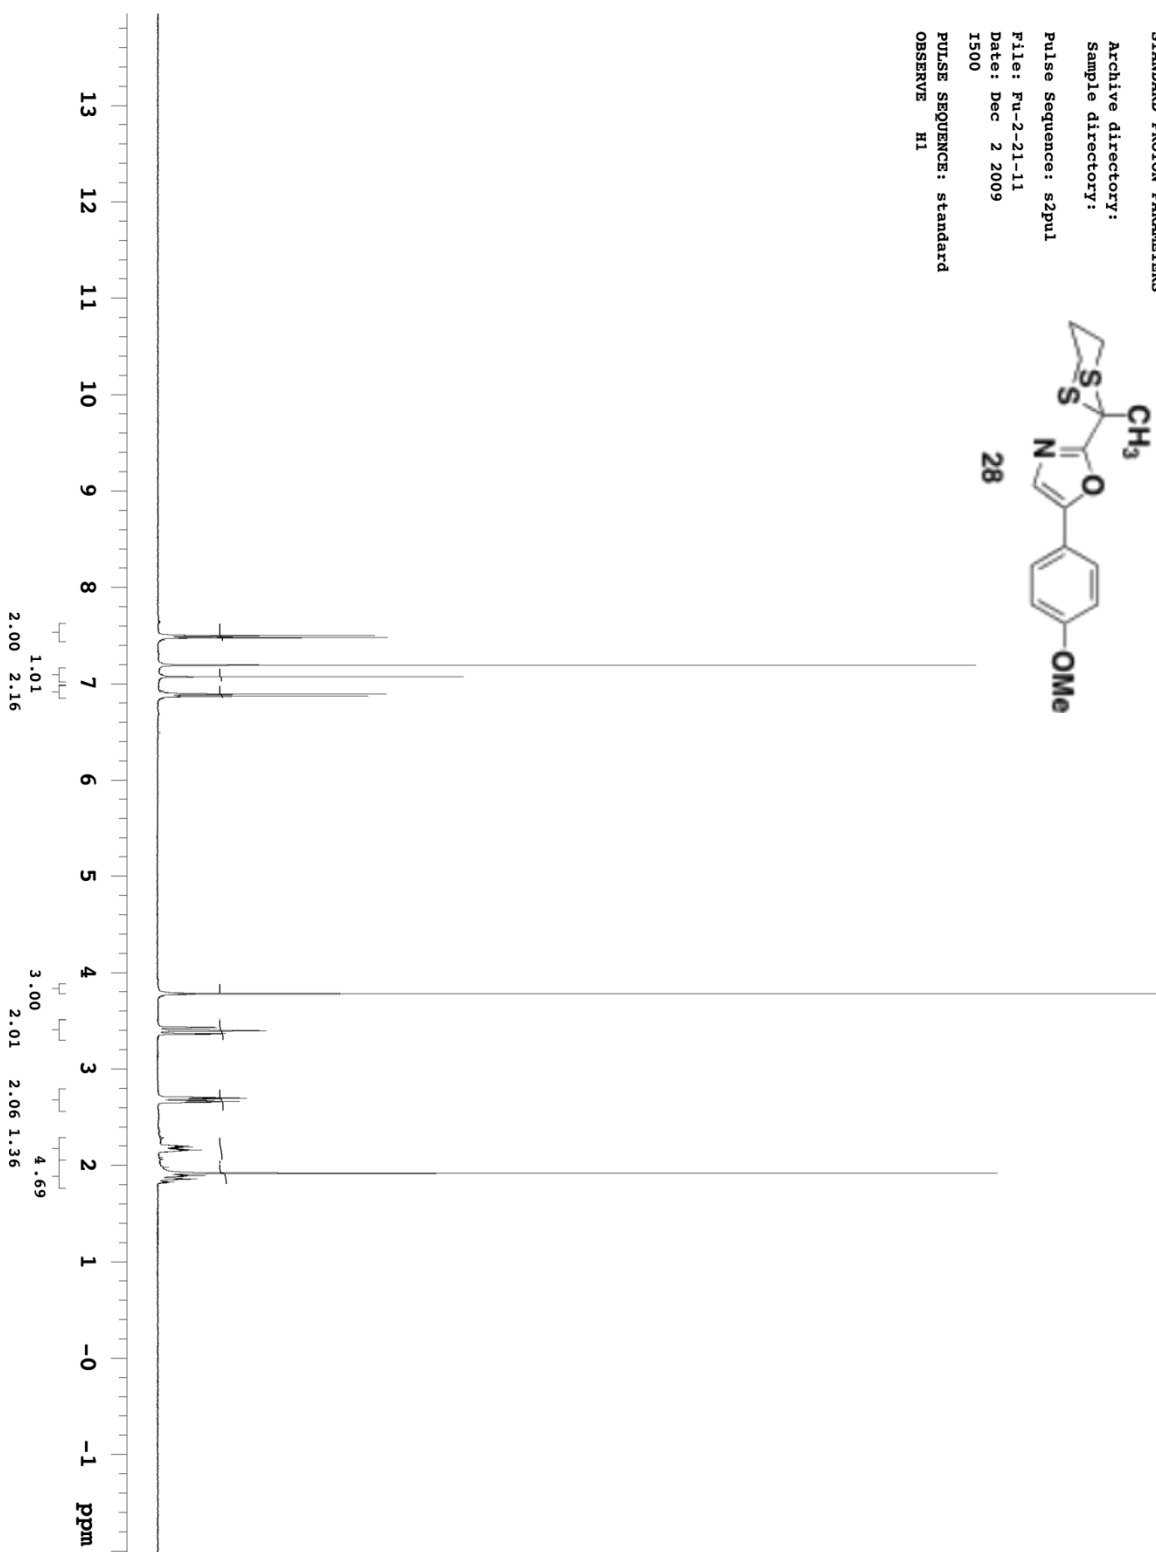

## STANDARD CARBON PARAMETERS

Archive directory:  
Sample directory:

Pulse Sequence: szpul

User: 1-14-87

File: Fu-2-21-2

Date: Dec 2 2009

1500

PULSE SEQUENCE: standard

OBSERVE C13

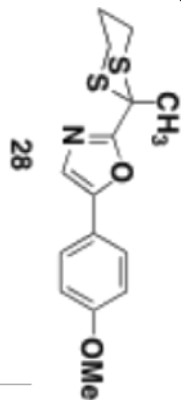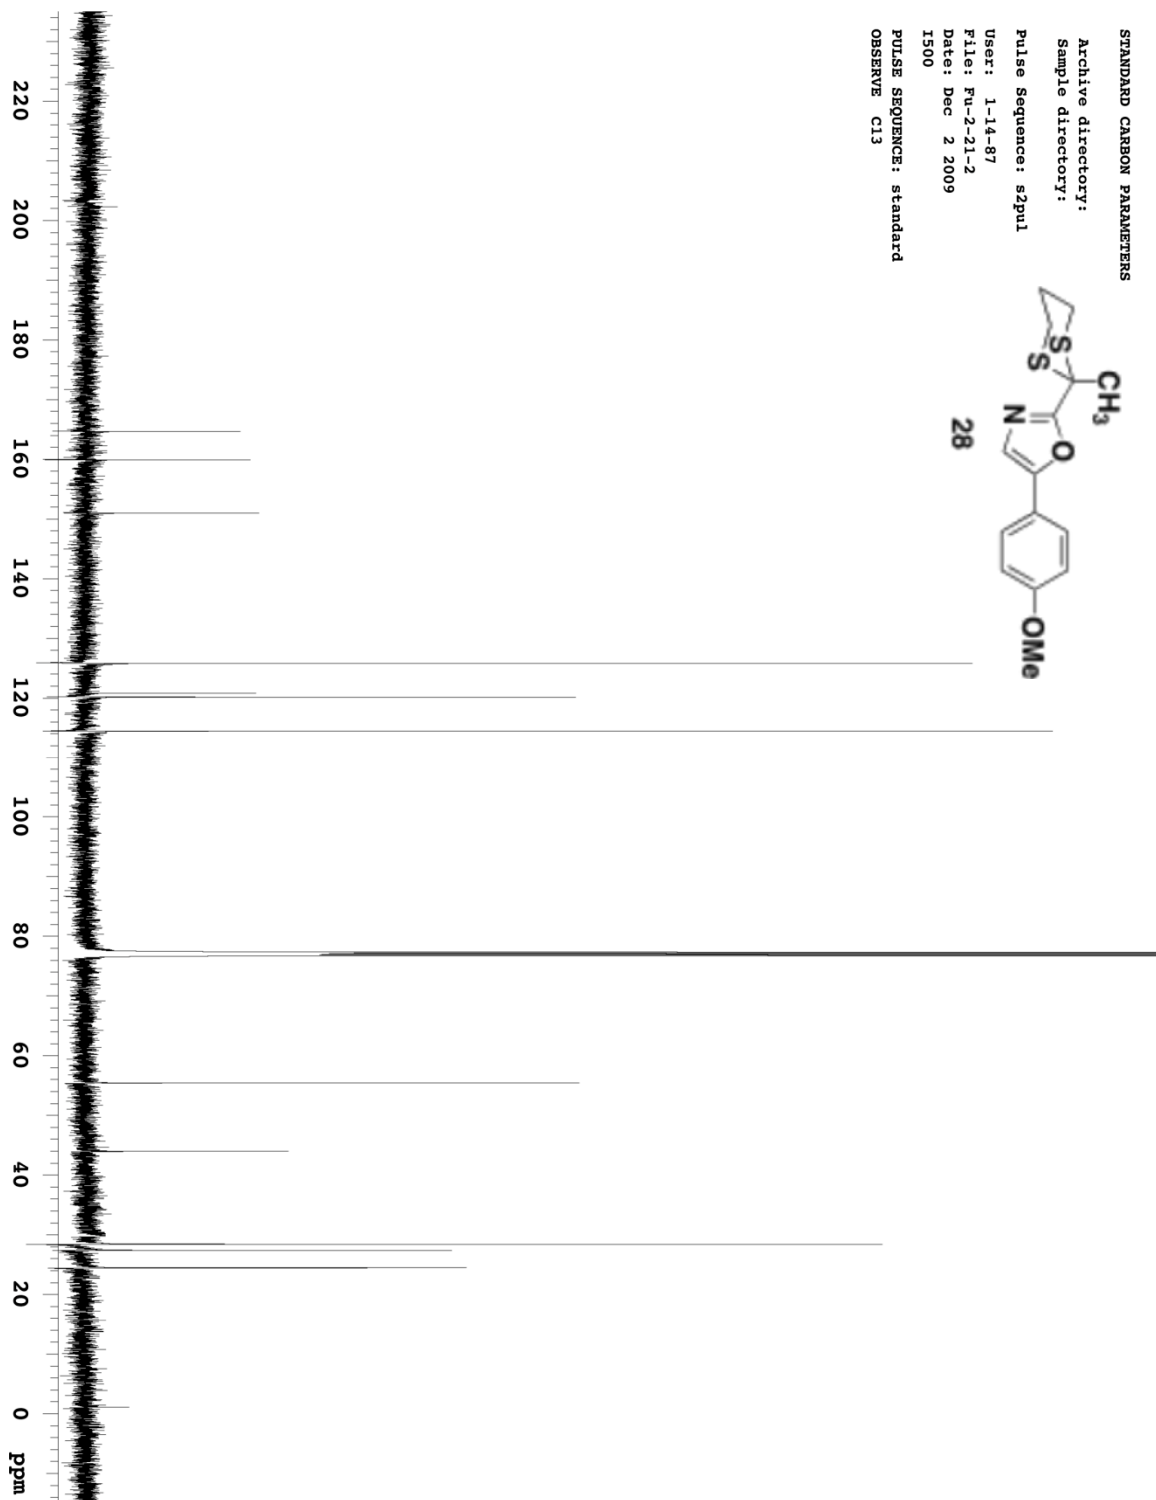

Supplement: NIHMS171983-supplement-1_si_001.pdf [file NIHMS171983-supplement-1_si_001.pdf]
